# Supplementary material for: Rhodium-catalyzed sequential B(3)-, B(4)-, and B(5)-trifunctionalization of o-carboranes with three different substituents
Source: Royal Society of Chemistry journal article supplement (doi:10.1039/d1cc05936j), 2021-12-08
Supplement: d1cc05936j1.pdf [file d1cc05936j1.pdf]

## *Electronic Supplementary Information*

### **Rhodium-catalyzed sequential B(3)–, B(4)–, and B(5)- trifunctionalization of *o*-carboranes with three different substituents**

Biao Cheng,<sup>†</sup> Yu Chen,<sup>†</sup> Peng Zhou, and Zuowei Xie\*

*Department of Chemistry and State Key Laboratory of Synthetic Chemistry, The Chinese  
University of Hong Kong, Shatin, New Territories, Hong Kong, China*

E-mail: [zxie@cuhk.edu.hk](mailto:zxie@cuhk.edu.hk)

#### **Table of Contents**

|                               |     |
|-------------------------------|-----|
| General Information           | S2  |
| Experimental Section          | S2  |
| Preliminary Mechanistic Study | S17 |
| References                    | S19 |
| NMR Spectra                   | S20 |

## General Information.

All reactions were carried out in flame-dried glassware under an atmosphere of dry argon with the exclusion of air and moisture using standard Schlenk techniques or in a drybox. All organic solvents were dried by standard procedures prior to use.  $^1\text{H}$ ,  $^{13}\text{C}$ , and  $^{11}\text{B}$  NMR spectra were recorded on Bruker DPX 400/500 spectrometer at 400/500, 100/125, and 128/160 MHz, respectively.  $^1\text{H}$  NMR chemical shifts were referenced to tetramethylsilane signal (0.00 ppm) or the residual solvent resonances of the deuterated solvents.  $^{13}\text{C}$  NMR chemical shifts were referenced to the residual solvent resonances of the deuterated solvents.  $^{11}\text{B}$  NMR chemical shifts were referenced to external  $\text{BF}_3\cdot\text{OEt}_2$  (0.00 ppm). High Resolution Mass Spectra (HRMS) were obtained on a Thermo Q Exactive™ Focus Hybrid Quadrupole-Orbitrap™ Mass Spectrometer. GC-MS analyses were performed on Agilent GC-MS 6890N. Melting points were measured using a Nikon Polarizing Microscope ECLIPSE 50i POL equipped with an INTEC HCS302 heating stage without calibration. Carboranyl carboxylic acid (**1**), 1-COOH-2-Me-4-[(Ph)C=CH(Ph)]-*o*-C<sub>2</sub>B<sub>10</sub>H<sub>9</sub>, and 1,4-[COOC(Ph)=C(Ph)]-2-Me-*o*-C<sub>2</sub>B<sub>10</sub>H<sub>9</sub> were prepared according to the literature method.<sup>1,2</sup> All other chemicals were purchased from either Aldrich or Acros Chemical Co. and used as received unless otherwise specified.

## Experimental Section.

### Preparation of B(3,4,5)-trifunctionalized carboranes (**4**). A representative procedure.

A PhCF<sub>3</sub> (10 mL) suspension of 1-COOH-2-CH<sub>3</sub>-*o*-C<sub>2</sub>B<sub>10</sub>H<sub>10</sub> (**1**; 20.2 mg, 0.10 mmol), diphenylacetylene (**2a**; 53.4 mg, 0.30 mmol), Cu(OPiv)<sub>2</sub> (**3a**; 79.8 mg, 0.30 mmol), [Cp\**Rh*Cl<sub>2</sub>]<sub>2</sub> (3.1 mg, 0.005 mmol), AgSbF<sub>6</sub> (6.9 mg, 0.02 mmol) and Li<sub>2</sub>CO<sub>3</sub> (44.4 mg, 0.6 mmol) in a closed Schlenk flask was heated at 160 °C (bath temperature) for 2 h. After removal of the solvent, the residue was then subjected to column chromatography on silica gel (230-400 mesh) using *n*-hexane and ethyl acetate (100/1 in V/V) as an eluent to give **4a**.

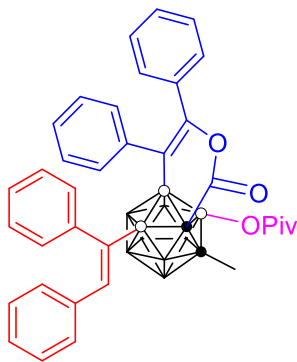

**4a**: 46.0 mg, 70% yield. Colorless crystals. Mp: 171–173 °C.  $^1\text{H}$  NMR (400 MHz,  $\text{CDCl}_3$ ):  $\delta$  7.32 (m, 3H), 7.19 (m, 4H), 7.13 (m, 6H), 7.03 (m, 3H), 6.95 (m, 2H) (aryl CH), 6.85 (s, 1H) (alkenyl CH), 6.80 (m, 2H) (aryl CH), 2.18 (s, 3H) (cage  $\text{CH}_3$ ), 1.14 (s, 9H) ( $^t\text{Bu}$ ).  $^{13}\text{C}\{^1\text{H}\}$  NMR (100 MHz,  $\text{CDCl}_3$ ):  $\delta$  175.8, 153.4 ( $\text{C}=\text{O}$ ), 151.9, 141.2, 140.8, 138.2, 137.0, 132.7, 129.8, 129.6, 129.3, 129.2, 129.1, 128.8, 128.5, 128.0, 127.9, 127.4, 127.1, 127.0 (aryl & alkenyl C), 76.1, 67.4 (cage C), 39.9, 27.2 ( $^t\text{Bu}$ ), 21.0 (cage  $\text{CH}_3$ ).  $^{11}\text{B}\{^1\text{H}\}$  NMR (128 MHz,  $\text{CDCl}_3$ ):  $\delta$  -3.81 (1B), -6.00 (2B), -7.09 (2B), -14.17 (5B). HRMS (ESI)  $m/z$ :  $[\text{M}+\text{Na}]^+$  Calcd for  $\text{C}_{37}\text{H}_{40}\text{B}_{10}\text{O}_4\text{Na}$  679.3840; Found 679.3821.

Single crystals of **4a** were grown from slow evaporation of *n*-hexane solution at room temperature over 3 days. The data were collected on a Bruker AXS Kappa ApexII Duo Diffractometer.

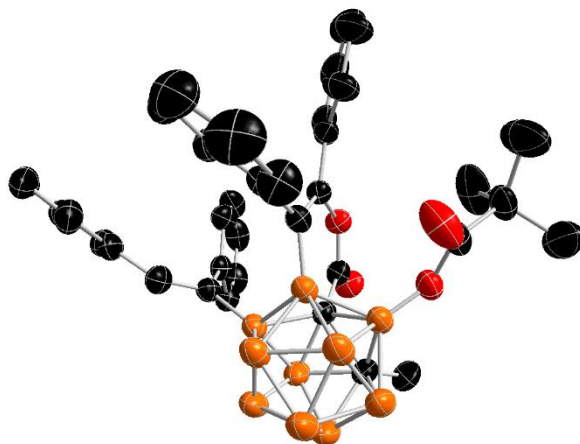

**Figure S1.** Molecular Structure of **4a**. The thermal ellipsoids are drawn at the 40% probability level.

**Table S1.** Crystal data and structure refinement for **4a**.

|                   |                                                     |
|-------------------|-----------------------------------------------------|
| Empirical formula | $\text{C}_{37}\text{H}_{40}\text{B}_{10}\text{O}_4$ |
| Formula weight    | 656.79                                              |
| Temperature       | 300(2) K                                            |
| Wavelength        | 0.71073 Å                                           |
| Crystal system    | Triclinic                                           |

|                                   |                                             |                             |
|-----------------------------------|---------------------------------------------|-----------------------------|
| Space group                       | P-1                                         |                             |
| Unit cell dimensions              | a = 10.417(8) Å                             | $\alpha = 82.25(2)^\circ$ . |
|                                   | b = 13.107(9) Å                             | $\beta = 69.77(2)^\circ$ .  |
|                                   | c = 14.452(10) Å                            | $\gamma = 86.78(2)^\circ$ . |
| Volume                            | 1834(2) Å <sup>3</sup>                      |                             |
| Z                                 | 2                                           |                             |
| Density (calculated)              | 1.189 Mg/m <sup>3</sup>                     |                             |
| Absorption coefficient            | 0.070 mm <sup>-1</sup>                      |                             |
| F(000)                            | 688                                         |                             |
| Crystal size                      | 0.400 x 0.300 x 0.200 mm <sup>3</sup>       |                             |
| Theta range for data collection   | 2.310 to 25.249°.                           |                             |
| Index ranges                      | -12<=h<=12, -15<=k<=15, -17<=l<=17          |                             |
| Reflections collected             | 49399                                       |                             |
| Independent reflections           | 6610 [R(int) = 0.0579]                      |                             |
| Completeness to theta = 25.242°   | 99.2 %                                      |                             |
| Absorption correction             | Semi-empirical from equivalents             |                             |
| Max. and min. transmission        | 0.7456 and 0.6839                           |                             |
| Refinement method                 | Full-matrix least-squares on F <sup>2</sup> |                             |
| Data / restraints / parameters    | 6610 / 0 / 461                              |                             |
| Goodness-of-fit on F <sup>2</sup> | 1.053                                       |                             |
| Final R indices [I>2sigma(I)]     | R1 = 0.0701, wR2 = 0.1757                   |                             |
| R indices (all data)              | R1 = 0.1093, wR2 = 0.2055                   |                             |
| Extinction coefficient            | 0.091(6)                                    |                             |
| Largest diff. peak and hole       | 0.576 and -0.621 e.Å <sup>-3</sup>          |                             |

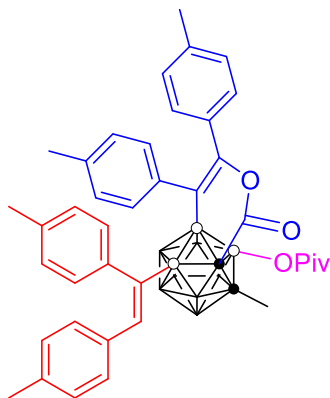

**4b**: 51.3 mg, 72% yield. Pale yellow solid. Mp: 123–125 °C.

The crude product was purified by column chromatography on silica gel (230-400 mesh) using *n*-hexane and ethyl acetate (100/1 in V/V) as eluent. <sup>1</sup>H NMR (400 MHz, CDCl<sub>3</sub>):  $\delta$  7.12 (d, *J* = 8.0 Hz, 2H), 7.03 (d, *J* = 8.0 Hz, 2H), 6.98 (m, 4H), 6.91 (d, *J* = 8.0 Hz, 2H), 6.84 (m, 4H) (aryl CH), 6.78 (s, 1H)

(alkenyl CH), 6.69 (d, *J* = 8.0 Hz, 2H) (aryl CH), 2.39 (s, 3H), 2.30 (s, 3H), 2.24 (s, 3H), 2.19 (s, 3H), 2.16 (s, 3H) (cage CH<sub>3</sub> & aryl CH<sub>3</sub>), 1.13 (s, 9H) ('Bu). <sup>13</sup>C {<sup>1</sup>H} NMR (125

MHz, CDCl<sub>3</sub>):  $\delta$  175.8, 153.6 (C=O), 151.8, 140.9, 138.9, 138.0, 137.2, 136.5, 136.4, 135.4, 134.4, 130.0, 129.7, 129.6, 129.4, 129.3, 129.2, 129.1, 128.6, 128.5 (aryl & alkenyl C), 75.9, 67.4 (cage C), 39.9, 27.2 (<sup>t</sup>Bu), 21.5, 21.4, 21.3, 21.2, 21.0 (CH<sub>3</sub>). <sup>11</sup>B{<sup>1</sup>H} NMR (160 MHz, CDCl<sub>3</sub>):  $\delta$  -3.55 (1B), -6.65 (4B), -13.85. HRMS (ESI) *m/z*: [M+Na]<sup>+</sup> Calcd for C<sub>41</sub>H<sub>48</sub>B<sub>10</sub>O<sub>4</sub>Na 736.4442; Found 736.4421.

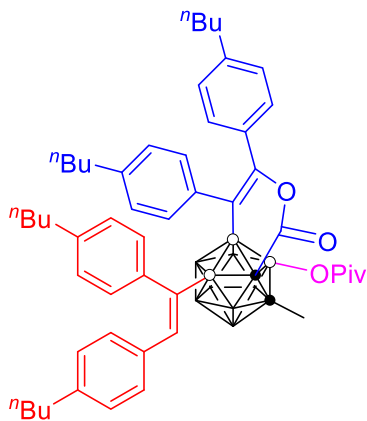

**4c:** 65.2 mg, 74% yield. Colorless oil. The crude product was purified by column chromatography on silica gel (230-400 mesh) using *n*-hexane and ethyl acetate (100/1 in V/V) as eluent. <sup>1</sup>H NMR (400 MHz, CDCl<sub>3</sub>):  $\delta$  7.12 (d, *J* = 8.0 Hz, 2H), 7.03 (dd, *J* = 8.0, 8.0 Hz, 4H), 6.96 (d, *J* = 8.0 Hz, 2H), 6.91 (d, *J* = 8.0 Hz, 2H), 6.84 (d, *J* = 8.0 Hz, 2H), 6.79 (m, 3H), 6.69 (d, *J* = 8.0 Hz, 2H) (aryl & alkenyl CH), 2.60 (m, 4H), 2.47 (m, 4H) (<sup>n</sup>Bu), 2.18 (s, 3H) (cage CH<sub>3</sub>), 1.62 (m, 4H), 1.50 (m, 4H), 1.38 (m, 4H), 1.30 (m, 4H) (<sup>n</sup>Bu), 1.15 (s, 9H) (<sup>t</sup>Bu), 0.98 (t, *J* = 7.4 Hz, 3H), 0.93 (t, *J* = 7.4 Hz, 3H), 0.89 (t, *J* = 7.4 Hz, 3H), 0.86 (t, *J* = 7.4 Hz, 3H). <sup>13</sup>C{<sup>1</sup>H} NMR (125 MHz, CD<sub>2</sub>Cl<sub>2</sub>):  $\delta$  175.9, 153.8 (C=O), 152.3, 144.5, 142.7, 142.0, 141.9, 141.0, 138.6, 135.8, 134.8, 130.5, 129.9, 129.8, 129.7, 129.3, 128.9, 128.7, 128.2, 128.1 (aryl & alkenyl C), 76.6, 68.0 (cage C), 40.1 (<sup>t</sup>Bu), 35.8, 35.7, 35.6, 35.5, 34.3, 33.8, 33.7, 33.6 (<sup>n</sup>Bu), 27.2 (<sup>t</sup>Bu), 22.9, 22.8, 22.7, 22.6 (<sup>n</sup>Bu), 21.2 (cage CH<sub>3</sub>), 14.3, 14.2, 14.1, 14.0 (<sup>n</sup>Bu). <sup>11</sup>B{<sup>1</sup>H} NMR (128 MHz, CDCl<sub>3</sub>):  $\delta$  -4.00 (1B), -6.40 (4B), -14.34 (5B). HRMS (ESI) *m/z*: [M+Na]<sup>+</sup> Calcd for C<sub>53</sub>H<sub>72</sub>B<sub>10</sub>O<sub>4</sub>Na 904.6327; Found 904.6320.

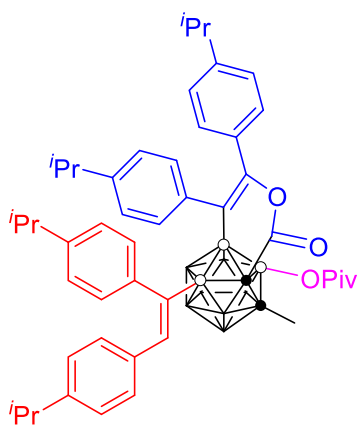

**4d:** 61.9 mg, 75% yield. Pale yellow solid. Mp: 160–162 °C.

The crude product was purified by column chromatography on silica gel (230-400 mesh) using *n*-hexane and ethyl acetate (100/1 in V/V) as eluent. <sup>1</sup>H NMR (400 MHz, CDCl<sub>3</sub>): δ 7.17 (d, *J* = 8.0 Hz, 2H), 7.06 (dd, *J* = 8.0, 8.0 Hz, 4H), 6.99 (dd, *J* = 8.0, 8.0 Hz, 4H), 6.90 (d, *J* = 8.0 Hz, 2H) (aryl *CH*), 6.82 (s, 1H) (alkenyl *CH*), 6.74 (dd, *J* = 8.0, 8.0

Hz, 4H) (aryl *CH*), 2.83 (m, 4H) (*i*Pr), 2.21 (s, 3H) (cage *CH*<sub>3</sub>), 1.32 (d, *J* = 7.4 Hz, 6H), 1.22 (d, *J* = 7.4 Hz, 6H) (*i*Pr), 1.19 (s, 9H) (*t*Bu), 1.18 (d, *J* = 7.4 Hz, 6H), 1.15 (d, *J* = 7.4 Hz, 6H) (*i*Pr). <sup>13</sup>C{<sup>1</sup>H} NMR (100 MHz, CDCl<sub>3</sub>): δ 175.8, 153.7 (C=O), 151.7, 149.6, 148.1, 147.6, 147.3, 140.4, 138.6, 135.5, 134.8, 130.3, 129.9, 129.6, 129.5, 129.1, 126.7, 126.4, 126.0, 125.8 (aryl & alkenyl C), 76.0, 67.7 (cage C), 39.9 (*t*Bu), 34.0, 33.9, 33.8, 33.7 (*i*Pr), 27.3 (*t*Bu), 24.3, 24.0, 23.9, 23.8 (*i*Pr), 21.0 (cage *CH*<sub>3</sub>). <sup>11</sup>B{<sup>1</sup>H} NMR (128 MHz, CDCl<sub>3</sub>): δ -3.76 (1B), -6.42 (4B), -14.05 (5B). HRMS (ESI) *m/z*: [M+Na]<sup>+</sup> Calcd for C<sub>49</sub>H<sub>64</sub>B<sub>10</sub>O<sub>4</sub>Na 848.5698; Found 848.5676.

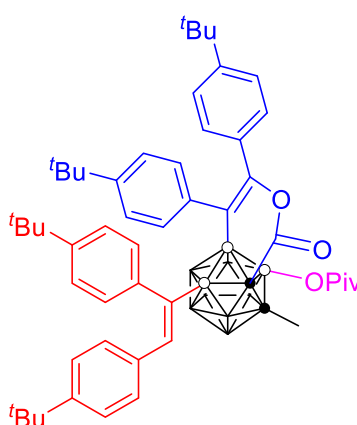

**4e:** 65.2 mg, 74% yield. Pale yellow solid. Mp: 138–140 °C.

The crude product was purified by column chromatography on silica gel (230-400 mesh) using *n*-hexane and ethyl acetate (100/1 in V/V) as eluent. <sup>1</sup>H NMR (400 MHz, CDCl<sub>3</sub>): δ 7.37 (d, *J* = 8.0 Hz, 1H), 7.29 (d, *J* = 8.0 Hz, 2H), 7.10 (m, 3H), 7.05 (m, 5H) (aryl *CH*), 6.81 (s, 1H) (alkenyl *CH*), 6.75 (m, 3H), 6.68 (m, 2H) (aryl *CH*), 2.20 (s, 3H)

(cage *CH*<sub>3</sub>), 1.35 (s, 9H), 1.27 (s, 9H), 1.22 (s, 9H), 1.19 (s, 9H), 1.18 (s, 9H) (*t*Bu). <sup>13</sup>C{<sup>1</sup>H} NMR (125 MHz, CD<sub>2</sub>Cl<sub>2</sub>): δ 177.4, 155.4 (C=O), 154.0, 153.6, 152.4, 151.8, 151.6, 141.9,

140.0, 136.9, 136.1, 131.8, 131.2, 131.1, 130.9, 130.6, 127.3, 127.0, 126.7, 126.6 (aryl & alkenyl C), 78.2, 69.7 (cage C), 41.6, 36.4, 36.3, 36.2, 36.1, 33.2, 32.9, 32.8, 32.7, 28.8 (tBu), 22.8 (cage CH<sub>3</sub>). <sup>11</sup>B{<sup>1</sup>H} NMR (128 MHz, CDCl<sub>3</sub>): δ -2.99 (1B), -5.36 (4B), -13.26 (5B). HRMS (ESI) *m/z*: [M+Na]<sup>+</sup> Calcd for C<sub>53</sub>H<sub>72</sub>B<sub>10</sub>O<sub>4</sub>Na 904.6327; Found 904.6315.

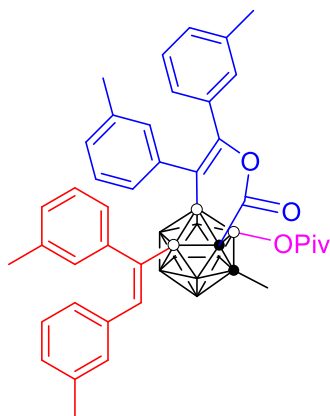

**4f**: 47.0 mg, 66% yield. Pale yellow solid. Mp: 127–129 °C.

The crude product was purified by column chromatography on silica gel (230-400 mesh) using *n*-hexane and ethyl acetate (100/1 in V/V) as eluent. <sup>1</sup>H NMR (400 MHz, CD<sub>2</sub>Cl<sub>2</sub>): δ 7.16 (m, 2H), 7.00 (m, 4H), 6.86 (m, 7H), 6.69 (m, 2H), 6.53 (m, 2H) (aryl & alkenyl CH), 2.27 (s, 3H), 2.20 (s, 3H), 2.17 (s,

3H), 2.16 (s, 3H), 2.10 (s, 3H) (cage CH<sub>3</sub> & aryl CH<sub>3</sub>), 1.18 (s, 9H) (tBu). <sup>13</sup>C{<sup>1</sup>H} NMR (125 MHz, CD<sub>2</sub>Cl<sub>2</sub>): δ 175.9, 153.8 (C=O), 152.3, 141.2, 140.9, 138.5, 138.4, 138.2, 137.9, 137.8, 137.2, 133.0, 131.0, 130.8, 130.6, 130.2, 130.0, 128.7, 128.4, 128.0, 127.9, 127.8, 127.7, 127.4, 127.1, 126.9, 126.8, 125.7 (aryl & alkenyl C), 76.6, 67.9 (cage C), 40.1, 27.2 (tBu), 21.6, 21.5, 21.4, 21.3, 21.2 (CH<sub>3</sub>). <sup>11</sup>B{<sup>1</sup>H} NMR (128 MHz, CDCl<sub>3</sub>): δ -3.38 (1B), -6.04 (4B), -13.64 (5B). HRMS (ESI) *m/z*: [M+Na]<sup>+</sup> Calcd for C<sub>41</sub>H<sub>48</sub>B<sub>10</sub>O<sub>4</sub>Na 736.4442; Found 736.4422.

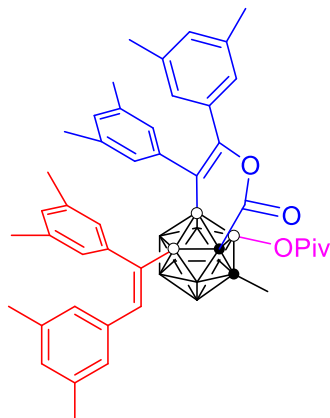

**4g**: 41.5 mg, 54% yield. Colorless crystals. Mp: 160–162 °C.

The crude product was purified by column chromatography on silica gel (230-400 mesh) using *n*-hexane and ethyl acetate (100/1 in V/V) as eluent. <sup>1</sup>H NMR (400 MHz, CDCl<sub>3</sub>): δ 6.94 (s, 1H), 6.78 (s, 2H), 6.75 (m, 4H), 6.66 (m, 2H), 6.44 (s, 2H), 6.32 (s, 2H) (aryl & alkenyl CH), 2.28 (s, 3H), 2.23 (s, 3H),

2.20 (s, 3H), 2.12 (s, 6H), 2.08 (s, 6H), 2.05 (s, 6H) (cage & aryl CH<sub>3</sub>), 1.18 (s, 9H) (tBu).

$^{13}\text{C}\{^1\text{H}\}$  NMR (125 MHz,  $\text{CD}_2\text{Cl}_2$ ):  $\delta$  177.3, 155.5 (C=O), 153.6, 142.7, 141.8, 139.8, 139.7, 139.3, 138.9, 138.6, 134.3, 132.3, 130.8, 130.1, 129.6, 129.4, 129.2, 128.9, 128.8, 128.6 (aryl & alkenyl C), 78.0, 69.5 (cage C), 41.5, 31.6, 28.7, 22.9, 22.8, 22.7, 22.6 (tBu & aryl & cage  $\text{CH}_3$ ).  $^{11}\text{B}\{^1\text{H}\}$  NMR (128 MHz,  $\text{CDCl}_3$ ):  $\delta$  -3.37 (1B), -5.62 (4B), -13.38 (5B). HRMS (ESI)  $m/z$ :  $[\text{M}+\text{Na}]^+$  Calcd for  $\text{C}_{45}\text{H}_{56}\text{B}_{10}\text{O}_4\text{Na}$  792.5070; Found 792.5053.

Single crystals of **4g** were grown from slow evaporation of *n*-hexane solution at room temperature over 3 days. The data were collected on a Bruker AXS Kappa ApexII Duo Diffractometer.

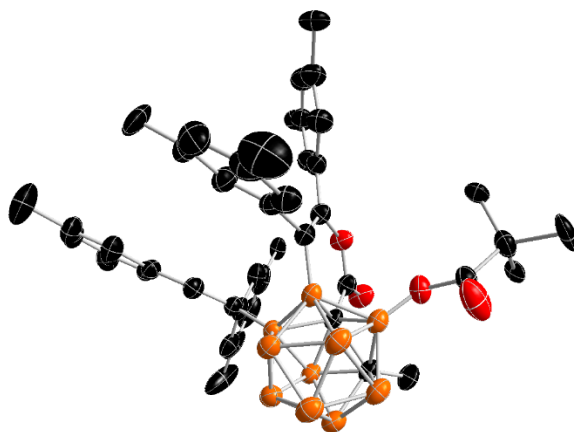

**Figure S2.** Molecular Structure of **4g**. The thermal ellipsoids are drawn at the 50% probability level.

**Table S2.** Crystal data and structure refinement for **4g**.

|                        |                                                                |                              |
|------------------------|----------------------------------------------------------------|------------------------------|
| Empirical formula      | C <sub>45</sub> H <sub>56</sub> B <sub>10</sub> O <sub>4</sub> |                              |
| Formula weight         | 768.99                                                         |                              |
| Temperature            | 296(2) K                                                       |                              |
| Wavelength             | 0.71073 Å                                                      |                              |
| Crystal system         | Monoclinic                                                     |                              |
| Space group            | C2/c                                                           |                              |
| Unit cell dimensions   | a = 26.398(2) Å                                                | $\alpha = 90^\circ$ .        |
|                        | b = 12.3769(8) Å                                               | $\beta = 104.828(6)^\circ$ . |
|                        | c = 28.5896(18) Å                                              | $\gamma = 90^\circ$ .        |
| Volume                 | 9029.9(11) Å <sup>3</sup>                                      |                              |
| Z                      | 8                                                              |                              |
| Density (calculated)   | 1.131 Mg/m <sup>3</sup>                                        |                              |
| Absorption coefficient | 0.066 mm <sup>-1</sup>                                         |                              |



|                                   |                                             |
|-----------------------------------|---------------------------------------------|
| F(000)                            | 3264                                        |
| Crystal size                      | 0.500 x 0.400 x 0.300 mm <sup>3</sup>       |
| Theta range for data collection   | 1.474 to 25.250°.                           |
| Index ranges                      | -31<=h<=31, -14<=k<=14, -34<=l<=33          |
| Reflections collected             | 67963                                       |
| Independent reflections           | 8192 [R(int) = 0.0518]                      |
| Completeness to theta = 25.242°   | 100.0 %                                     |
| Absorption correction             | multi-scan                                  |
| Max. and min. transmission        | 0.7456 and 0.6867                           |
| Refinement method                 | Full-matrix least-squares on F <sup>2</sup> |
| Data / restraints / parameters    | 8192 / 0 / 544                              |
| Goodness-of-fit on F <sup>2</sup> | 1.035                                       |
| Final R indices [I>2sigma(I)]     | R1 = 0.0542, wR2 = 0.1487                   |
| R indices (all data)              | R1 = 0.0705, wR2 = 0.1617                   |
| Extinction coefficient            | n/a                                         |
| Largest diff. peak and hole       | 0.429 and -0.288 e.Å <sup>-3</sup>          |

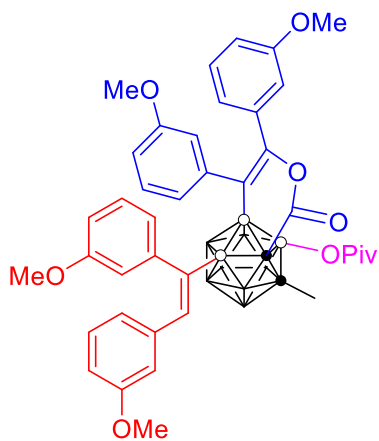

**4h**: 32.6 mg, 42% yield. Colorless oil. The crude product was purified by column chromatography on silica gel (230-400 mesh) using *n*-hexane and ethyl acetate (20/1 in V/V) as eluent. <sup>1</sup>H NMR (400 MHz, CDCl<sub>3</sub>): δ 7.25 (d, *J* = 8.0 Hz, 1H), 7.10 (m, 2H), 7.01 (d, *J* = 8.0 Hz, 1H), 6.86 (m, 3H), 6.76 (m, 3H), 6.72 (s, 1H), 6.69 (s, 2H), 6.65 (d, *J* = 8.0 Hz, 1H), 6.60 (d, *J* = 8.0 Hz, 1H), 6.53 (d, *J* = 8.0 Hz, 1H), 6.39 (s, 1H) (aryl & alkenyl *CH*), 3.73 (s, 3H), 3.65 (s, 3H), 3.50 (s, 3H), 3.47 (s, 3H) (OCH<sub>3</sub>), 2.21 (s, 3H) (cage CH<sub>3</sub>), 1.18 (s, 9H) (<sup>*t*</sup>Bu). <sup>13</sup>C {<sup>1</sup>H} NMR (125 MHz, CDCl<sub>3</sub>): δ 175.7 (C=O), 160.0, 159.7, 159.0, 158.9 (aryl C), 153.4 (C=O), 151.9, 142.4, 141.1, 139.6, 138.1, 133.9, 129.9, 129.5, 129.0, 128.9, 122.8, 122.2, 121.8, 121.5, 115.9, 114.7, 114.6, 114.5, 114.4, 113.7, 113.5, 112.7 (aryl & alkenyl C), 76.2, 67.3 (cage C), 55.4, 55.3, 55.1, 54.9 (OCH<sub>3</sub>), 39.9, 27.2 (<sup>*t*</sup>Bu), 21.0 (cage CH<sub>3</sub>). <sup>11</sup>B {<sup>1</sup>H} NMR (128 MHz, CDCl<sub>3</sub>): δ -3.55

(1B), -5.84 (4B), -14.02 (5B). HRMS (ESI)  $m/z$ :  $[M+Na]^+$  Calcd for  $C_{41}H_{48}B_{10}O_8Na$  800.4239; Found 800.4230.

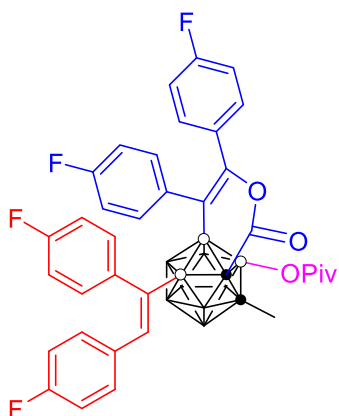

**4i**: 47.5 mg, 65% yield. White solid. Mp: 195–197 °C. The crude product was purified by column chromatography on silica gel (230-400 mesh) using *n*-hexane and ethyl acetate (100/1 in V/V) as eluent.  $^1H$  NMR (500 MHz,  $CDCl_3$ ):  $\delta$  7.11-7.06 (m, 2H), 7.03 (d,  $J = 7.0$  Hz, 4H), 6.94-6.81 (m, 6H), 6.79-6.70 (m, 5H) (aryl & alkenyl CH), 2.20 (s, 3H) (cage  $CH_3$ ), 1.13 (s, 9H) ( $t$ Bu).  $^{13}C\{^1H\}$  NMR (125 MHz,  $CDCl_3$ ):  $\delta$  175.5 ( $C=O$ ), 162.7 (d,  $^1J_{C-F} = 250$  Hz), 162.0 (d,  $^1J_{C-F} = 245$  Hz), 161.9 (d,  $^1J_{C-F} = 246$  Hz), 161.8 (d,  $^1J_{C-F} = 247$  Hz) (aryl C), 153.0 ( $C=O$ ), 150.9, 140.3 (alkenyl C), 136.1 (d,  $^4J_{C-F} = 3.4$  Hz), 133.6 (d,  $^4J_{C-F} = 3.4$  Hz), 132.6 (d,  $^4J_{C-F} = 3.3$  Hz), 131.3 (d,  $^3J_{C-F} = 8.5$  Hz), 131.2 (d,  $^3J_{C-F} = 7.8$  Hz), 131.1 (d,  $^3J_{C-F} = 7.6$  Hz), 130.6 (d,  $^3J_{C-F} = 6.8$  Hz), 128.3 (d,  $^4J_{C-F} = 3.5$  Hz), 115.8 (d,  $^2J_{C-F} = 18.5$  Hz), 115.6 (d,  $^2J_{C-F} = 18.8$  Hz), 115.2 (d,  $^2J_{C-F} = 21.6$  Hz), 115.0 (d,  $^2J_{C-F} = 21.3$  Hz) (aryl C), 76.1, 67.2 (cage C), 39.8, 27.0 ( $t$ Bu), 20.8 (cage  $CH_3$ ).  $^{11}B\{^1H\}$  NMR (160 MHz,  $CDCl_3$ ):  $\delta$  -3.53 (1B), -5.35 (2B), -6.94 (2B), -13.87 (5B). HRMS (APCI)  $m/z$ :  $[M]^-$  Calcd for  $C_{37}H_{36}B_{10}F_4O_4$  728.3576; Found 728.3553.

Single crystals of **4i** were grown from slow evaporation of *n*-hexane solution at room temperature over 3 days. The data were collected on a Bruker AXS Kappa ApexII Duo Diffractometer.

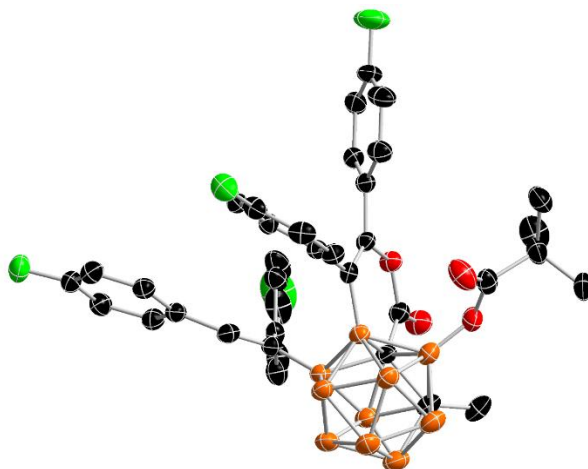

**Figure S3.** Molecular Structure of **4i**. The thermal ellipsoids are drawn at the 40% probability level.

**Table S3.** Crystal data and structure refinement for **4i**.

|                                 |                                                                               |                 |
|---------------------------------|-------------------------------------------------------------------------------|-----------------|
| Empirical formula               | C <sub>37</sub> H <sub>36</sub> B <sub>10</sub> F <sub>4</sub> O <sub>4</sub> |                 |
| Formula weight                  | 728.76                                                                        |                 |
| Temperature                     | 173(2) K                                                                      |                 |
| Wavelength                      | 0.71073 Å                                                                     |                 |
| Crystal system                  | Monoclinic                                                                    |                 |
| Space group                     | Cc                                                                            |                 |
| Unit cell dimensions            | a = 10.3780(8) Å                                                              | α = 90°.        |
|                                 | b = 21.2751(15) Å                                                             | β = 93.702(2)°. |
|                                 | c = 17.0225(12) Å                                                             | γ = 90°.        |
| Volume                          | 3750.6(5) Å <sup>3</sup>                                                      |                 |
| Z                               | 4                                                                             |                 |
| Density (calculated)            | 1.291 Mg/m <sup>3</sup>                                                       |                 |
| Absorption coefficient          | 0.091 mm <sup>-1</sup>                                                        |                 |
| F(000)                          | 1504                                                                          |                 |
| Crystal size                    | 0.400 x 0.300 x 0.200 mm <sup>3</sup>                                         |                 |
| Theta range for data collection | 2.187 to 25.249°.                                                             |                 |
| Index ranges                    | -12 ≤ h ≤ 12, -25 ≤ k ≤ 25, -20 ≤ l ≤ 20                                      |                 |
| Reflections collected           | 43605                                                                         |                 |
| Independent reflections         | 6811 [R(int) = 0.1017]                                                        |                 |
| Completeness to theta = 25.242° | 100.0 %                                                                       |                 |
| Absorption correction           | multi-scan                                                                    |                 |
| Max. and min. transmission      | 0.7456 and 0.6723                                                             |                 |
| Refinement method               | Full-matrix least-squares on F <sup>2</sup>                                   |                 |

|                                   |                                    |
|-----------------------------------|------------------------------------|
| Data / restraints / parameters    | 6811 / 7 / 525                     |
| Goodness-of-fit on F <sup>2</sup> | 1.049                              |
| Final R indices [I > 2σ(I)]       | R1 = 0.0431, wR2 = 0.0949          |
| R indices (all data)              | R1 = 0.0694, wR2 = 0.1114          |
| Absolute structure parameter      | -0.5(3)                            |
| Extinction coefficient            | 0.0043(5)                          |
| Largest diff. peak and hole       | 0.164 and -0.162 e.Å <sup>-3</sup> |

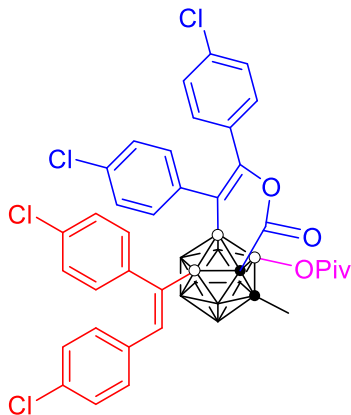

**4j**: 43.2 mg, 54% yield. Colorless oil. The crude product was purified by column chromatography on silica gel (230-400 mesh) using *n*-hexane and ethyl acetate (100/1 in V/V) as eluent. <sup>1</sup>H NMR (500 MHz, CDCl<sub>3</sub>): δ 7.30 (d, *J* = 7.5 Hz, 2H), 7.20-7.12 (m, 4H), 7.07-6.95 (m, 6H), 6.81-6.75 (m, 3H), 6.68 (d, *J* = 8.5 Hz, 2H) (aryl & alkenyl *CH*), 2.20 (s, 3H) (cage *CH*<sub>3</sub>), 1.13 (s, 9H) (*t*Bu). <sup>13</sup>C{<sup>1</sup>H} NMR (125 MHz, CDCl<sub>3</sub>): δ 175.5, 152.9 (C=O), 150.8, 140.1 (alkenyl C), 138.6, 136.0, 135.5, 134.7, 133.5, 133.4, 133.3, 130.8, 130.7, 130.5, 130.5, 130.4, 129.0, 128.9, 128.5, 128.3 (aryl C), 76.2, 67.2 (cage C), 39.8, 27.0 (*t*Bu), 20.8 (cage *CH*<sub>3</sub>). <sup>11</sup>B{<sup>1</sup>H} NMR (160 MHz, CDCl<sub>3</sub>): δ -3.42 (1B), -5.35 (1B), -7.07 (3B), -13.89 (5B). HRMS (APCI) *m/z*: [*M*]<sup>-</sup> Calcd for C<sub>37</sub>H<sub>36</sub>B<sub>10</sub>Cl<sub>4</sub>O<sub>4</sub> 794.2363; Found 794.2333.

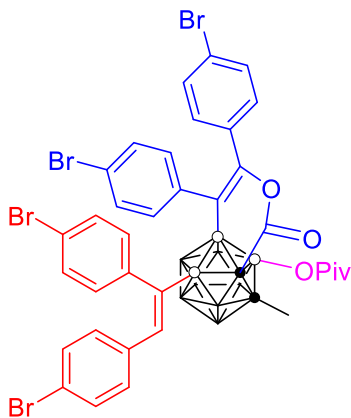

**4k**: 49.3 mg, 51% yield. Colorless oil. The crude product was purified by column chromatography on silica gel (230-400 mesh) using *n*-hexane and ethyl acetate (100/1 in V/V) as eluent. <sup>1</sup>H NMR (500 MHz, CDCl<sub>3</sub>): δ 7.44 (d, *J* = 7.5 Hz, 2H), 7.35-7.28 (m, 4H), 7.20 (d, *J* = 7.5 Hz, 2H), 6.96-6.88 (m, 4H), 6.76-6.67 (m, 3H), 6.62 (d, *J* = 8.0 Hz, 2H) (aryl & alkenyl *CH*), 2.20 (s, 3H) (cage *CH*<sub>3</sub>), 1.13 (s, 9H) (*t*Bu). <sup>13</sup>C{<sup>1</sup>H} NMR (125 MHz, CDCl<sub>3</sub>):

$\delta$  175.5, 152.9 (C=O), 150.8, 140.1 (alkenyl C), 139.1, 136.4, 135.0, 132.0, 131.9, 131.4, 131.3, 131.0, 130.9, 130.8, 130.6, 123.9, 121.8, 121.6, 121.4 (aryl C), 76.2, 67.2 (cage C), 39.8, 27.0 (tBu), 20.8 (cage CH<sub>3</sub>). <sup>11</sup>B{<sup>1</sup>H} NMR (160 MHz, CDCl<sub>3</sub>):  $\delta$  -3.42 (1B), -5.46 (1B), -7.23 (3B), -14.08 (5B). HRMS (APCI) *m/z*: [M]<sup>-</sup> Calcd for C<sub>37</sub>H<sub>36</sub>B<sub>10</sub>Br<sub>4</sub>O<sub>4</sub> 972.0331; Found 972.0311.

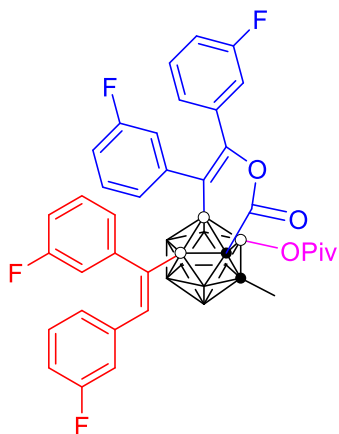

**4l**: 34.9 mg, 48% yield. White solid. Mp: 170–172 °C. The crude product was purified by column chromatography on silica gel (230-400 mesh) using *n*-hexane and ethyl acetate (100/1 in V/V) as eluent. <sup>1</sup>H NMR (500 MHz, CDCl<sub>3</sub>):  $\delta$  7.33 (dd, *J* = 8.0, 14.0 Hz, 1H), 7.18 (dd, *J* = 8.0, 14.0 Hz, 1H), 7.11 (dd, *J* = 8.0, 14.0 Hz, 1H), 7.08-7.01 (m, 2H), 6.96-6.90 (m, 2H), 6.89-6.84 (m, 3H), 6.82-6.75 (m, 3H), 6.71 (d, *J* = 7.5 Hz, 1H), 6.65-6.57 (m, 2H), 6.43 (d, *J* = 10.5 Hz, 1H) (aryl & alkenyl CH), 2.20 (s, 3H) (cage CH<sub>3</sub>), 1.14 (s, 9H) (tBu). <sup>13</sup>C{<sup>1</sup>H} NMR (125 MHz, CDCl<sub>3</sub>):  $\delta$  175.5 (C=O), 163.0 (d, <sup>1</sup>*J*<sub>C-F</sub> = 246 Hz), 162.7 (d, <sup>1</sup>*J*<sub>C-F</sub> = 245 Hz), 162.3 (d, <sup>1</sup>*J*<sub>C-F</sub> = 244 Hz), 162.1 (d, <sup>1</sup>*J*<sub>C-F</sub> = 245 Hz) (aryl C), 152.7 (C=O), 150.7 (d, <sup>4</sup>*J*<sub>C-F</sub> = 2.6 Hz) (alkenyl C), 142.1 (d, <sup>3</sup>*J*<sub>C-F</sub> = 7.3 Hz) (aryl C), 140.3 (d, <sup>4</sup>*J*<sub>C-F</sub> = 2.3 Hz) (alkenyl C), 139.6 (d, <sup>3</sup>*J*<sub>C-F</sub> = 8.0 Hz), 138.3 (d, <sup>3</sup>*J*<sub>C-F</sub> = 7.5 Hz), 133.9 (d, <sup>3</sup>*J*<sub>C-F</sub> = 8.0 Hz), 130.5 (d, <sup>3</sup>*J*<sub>C-F</sub> = 8.4 Hz), 130.2 (d, <sup>3</sup>*J*<sub>C-F</sub> = 8.5 Hz), 129.6 (d, <sup>3</sup>*J*<sub>C-F</sub> = 8.1 Hz), 129.4 (d, <sup>3</sup>*J*<sub>C-F</sub> = 8.3 Hz), 125.4 (d, <sup>4</sup>*J*<sub>C-F</sub> = 2.8 Hz), 125.2 (d, <sup>4</sup>*J*<sub>C-F</sub> = 2.8 Hz), 125.1 (d, <sup>4</sup>*J*<sub>C-F</sub> = 2.8 Hz), 124.7, 116.6 (d, <sup>2</sup>*J*<sub>C-F</sub> = 21.0 Hz), 116.3 (d, <sup>2</sup>*J*<sub>C-F</sub> = 22.0 Hz), 116.1 (d, <sup>2</sup>*J*<sub>C-F</sub> = 24.9 Hz), 115.9 (d, <sup>2</sup>*J*<sub>C-F</sub> = 22.4 Hz), 114.6 (d, <sup>2</sup>*J*<sub>C-F</sub> = 21.1 Hz), 114.5 (d, <sup>2</sup>*J*<sub>C-F</sub> = 22.9 Hz), 114.4 (d, <sup>2</sup>*J*<sub>C-F</sub> = 22.8 Hz), 76.2, 67.1 (cage C), 39.8, 27.0 (tBu), 20.8 (cage CH<sub>3</sub>). <sup>11</sup>B{<sup>1</sup>H} NMR (160 MHz, CDCl<sub>3</sub>):  $\delta$  -3.41 (1B), -5.34 (1B), -6.97 (3B), -13.75 (5B). HRMS (APCI) *m/z*: [M]<sup>-</sup> Calcd for C<sub>37</sub>H<sub>36</sub>B<sub>10</sub>F<sub>4</sub>O<sub>4</sub> 728.3576; Found 728.3546.

Single crystals of **4I** were grown from slow evaporation of *n*-hexane solution at room temperature over 3 days. The data were collected on a Bruker AXS Kappa ApexII Duo Diffractometer.

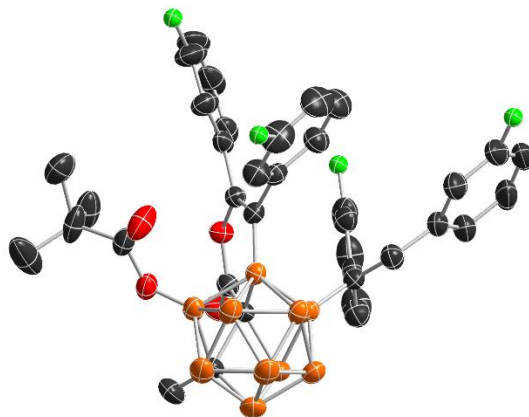

**Figure S4.** Molecular Structure of **4I**. The thermal ellipsoids are drawn at the 40% probability level.

**Table S4.** Crystal data and structure refinement for **4I**.

|                                 |                                                                               |                  |
|---------------------------------|-------------------------------------------------------------------------------|------------------|
| Empirical formula               | C <sub>37</sub> H <sub>36</sub> B <sub>10</sub> F <sub>4</sub> O <sub>4</sub> |                  |
| Formula weight                  | 728.76                                                                        |                  |
| Temperature                     | 296(2) K                                                                      |                  |
| Wavelength                      | 0.71073 Å                                                                     |                  |
| Crystal system                  | Triclinic                                                                     |                  |
| Space group                     | P-1                                                                           |                  |
| Unit cell dimensions            | a = 10.4650(12) Å                                                             | α = 96.643(4)°.  |
|                                 | b = 13.5333(16) Å                                                             | β = 111.103(4)°. |
|                                 | c = 14.4641(17) Å                                                             | γ = 93.586(4)°.  |
| Volume                          | 1886.2(4) Å <sup>3</sup>                                                      |                  |
| Z                               | 2                                                                             |                  |
| Density (calculated)            | 1.283 Mg/m <sup>3</sup>                                                       |                  |
| Absorption coefficient          | 0.090 mm <sup>-1</sup>                                                        |                  |
| F(000)                          | 752                                                                           |                  |
| Crystal size                    | 0.400 x 0.300 x 0.200 mm <sup>3</sup>                                         |                  |
| Theta range for data collection | 2.452 to 25.248°.                                                             |                  |
| Index ranges                    | -12 ≤ h ≤ 12, -16 ≤ k ≤ 16, -17 ≤ l ≤ 17                                      |                  |
| Reflections collected           | 50988                                                                         |                  |
| Independent reflections         | 6808 [R(int) = 0.1097]                                                        |                  |
| Completeness to theta = 25.242° | 99.6 %                                                                        |                  |
| Absorption correction           | multi-scan                                                                    |                  |

|                                   |                                             |
|-----------------------------------|---------------------------------------------|
| Max. and min. transmission        | 0.7456 and 0.6989                           |
| Refinement method                 | Full-matrix least-squares on F <sup>2</sup> |
| Data / restraints / parameters    | 6808 / 24 / 554                             |
| Goodness-of-fit on F <sup>2</sup> | 1.044                                       |
| Final R indices [I > 2σ(I)]       | R1 = 0.0685, wR2 = 0.1857                   |
| R indices (all data)              | R1 = 0.0840, wR2 = 0.2034                   |
| Extinction coefficient            | 0.069(7)                                    |
| Largest diff. peak and hole       | 0.755 and -0.333 e.Å <sup>-3</sup>          |

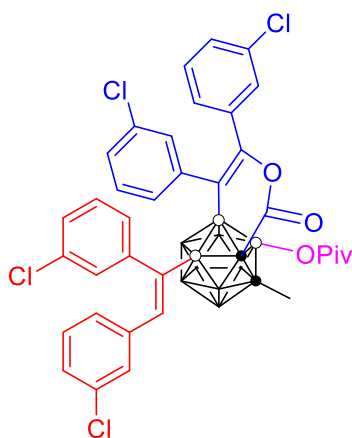

**4m**: 38.8 mg, 49% yield. Colorless oil. The crude product was purified by column chromatography on silica gel (230-400 mesh) using *n*-hexane and ethyl acetate (100/1 in V/V) as eluent. <sup>1</sup>H NMR (500 MHz, CDCl<sub>3</sub>): δ 7.39-7.28 (m, 2H), 7.24-7.12 (m, 4H), 7.09-7.02 (m, 3H), 7.01-6.95 (m, 2H), 6.92 (d, *J* = 8.0 Hz, 1H), 6.84-6.75 (m, 3H), 6.69 (s, 1H), 6.63 (d, *J* = 8.0 Hz, 1H) (aryl & alkenyl CH), 2.21 (s, 3H) (cage CH<sub>3</sub>), 1.15 (s, 9H) (<sup>t</sup>Bu). <sup>13</sup>C{<sup>1</sup>H} NMR (125 MHz, CDCl<sub>3</sub>): δ 175.4, 152.7 (C=O), 150.6, 141.7 (alkenyl C), 140.0, 139.1, 137.7, 134.7, 134.4, 134.2, 133.9, 133.4, 130.1, 129.9, 129.7, 129.6, 129.2, 129.1, 129.0, 128.7, 127.9, 127.8, 127.7, 127.6, 127.6, 127.5, 127.3 (aryl C), 76.2, 67.2 (cage C), 39.8, 27.0 (<sup>t</sup>Bu), 20.8 (cage CH<sub>3</sub>). <sup>11</sup>B{<sup>1</sup>H} NMR (160 MHz, CDCl<sub>3</sub>): δ -3.42 (1B), -5.30 (1B), -6.97 (3B), -13.58 (5B). HRMS (APCI) *m/z*: [M]<sup>+</sup> Calcd for C<sub>37</sub>H<sub>36</sub>B<sub>10</sub>Cl<sub>4</sub>O<sub>4</sub> 794.2363; Found 794.2334.

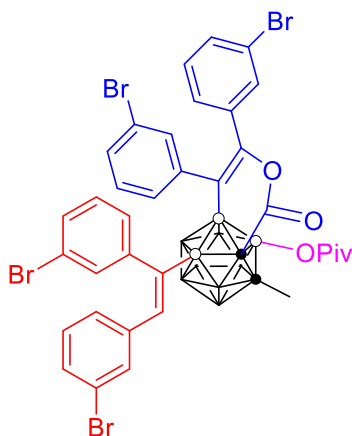

**4n**: 44.6 mg, 46% yield. Colorless oil. The crude product was purified by column chromatography on silica gel (230-400 mesh) using *n*-hexane and ethyl acetate (100/1 in V/V) as eluent.  $^1\text{H}$  NMR (500 MHz,  $\text{CDCl}_3$ ):  $\delta$  7.51 (d,  $J = 7.5$  Hz, 1H), 7.40-7.33 (m, 3H), 7.25-7.17 (m, 3H), 7.11-6.90 (m, 6H), 6.84-6.74 (m, 3H), 6.68 (d,  $J = 7.5$  Hz, 1H) (aryl & alkenyl CH), 2.22 (s, 3H) (cage  $\text{CH}_3$ ), 1.16 (s, 9H) ( $^t\text{Bu}$ ).

$^{13}\text{C}\{^1\text{H}\}$  NMR (125 MHz,  $\text{CDCl}_3$ ):  $\delta$  175.4, 152.7 ( $\text{C}=\text{O}$ ), 150.5, 142.0 (alkenyl C), 139.8, 139.3, 138.0, 133.6, 132.7, 132.6, 131.9, 131.8, 131.5, 130.7, 130.5, 130.3, 130.2, 129.5, 129.4, 128.3, 128.0, 127.9, 127.8, 122.9, 122.6, 122.2, 122.1 (aryl C), 76.3, 67.3 (cage C), 39.8, 27.0 ( $^t\text{Bu}$ ), 20.8 (cage  $\text{CH}_3$ ).  $^{11}\text{B}\{^1\text{H}\}$  NMR (160 MHz,  $\text{CDCl}_3$ ):  $\delta$  -3.44 (1B), -5.41 (1B), -7.23 (3B), -13.87 (5B). HRMS (APCI)  $m/z$ :  $[\text{M}]^-$  Calcd for  $\text{C}_{37}\text{H}_{36}\text{B}_{10}\text{Br}_4\text{O}_4$  972.0331; Found 972.0295.

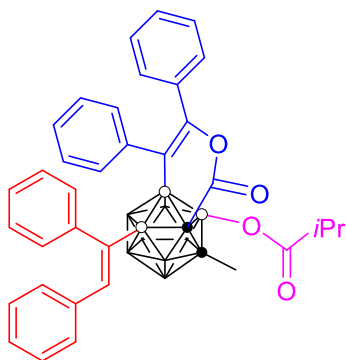

**4o**: 29.2 mg, 45% yield. White solid. Mp: 208–209 °C. The crude product was purified by column chromatography on silica gel (230-400 mesh) using *n*-hexane and ethyl acetate (100/1 in V/V) as eluent.  $^1\text{H}$  NMR (500 MHz,  $\text{CDCl}_3$ ):  $\delta$  7.36-7.29 (m, 3H), 7.20-7.09 (m, 10H), 7.07-7.00 (m, 3H), 6.96-6.90 (m, 2H) (aryl CH), 6.85 (s, 1H) (alkenyl CH), 6.81-6.76

(m, 2H) (aryl CH), 2.60-2.50 (m, 1H) ( $^i\text{Pr}$ ), 2.17 (s, 3H) (cage  $\text{CH}_3$ ), 1.13 (d,  $J = 7.0$  Hz, 3H), 1.08 (d,  $J = 7.0$  Hz, 3H) ( $^i\text{Pr}$ ).  $^{13}\text{C}\{^1\text{H}\}$  NMR (125 MHz,  $\text{CDCl}_3$ ):  $\delta$  173.9, 153.2 ( $\text{C}=\text{O}$ ), 151.8, 141.0, 140.7, 138.0, 136.8, 132.6, 129.7, 129.6, 129.4, 129.0, 128.9, 128.6, 128.3, 127.8, 127.3, 127.0, 126.9 (aryl & alkenyl C), 75.8, 67.3 (cage C), 35.2 ( $^i\text{Pr}$ ), 20.8 (cage  $\text{CH}_3$ ), 18.9, 18.7 ( $^i\text{Pr}$ ).  $^{11}\text{B}\{^1\text{H}\}$  NMR (160 MHz,  $\text{CDCl}_3$ ):  $\delta$  -3.68 (1B), -5.60 (1B), -



6.87 (3B), -13.97 (5B). HRMS (ESI)  $m/z$ :  $[M]^-$  Calcd for  $C_{36}H_{38}B_{10}O_4$  642.3796; Found 642.3782.

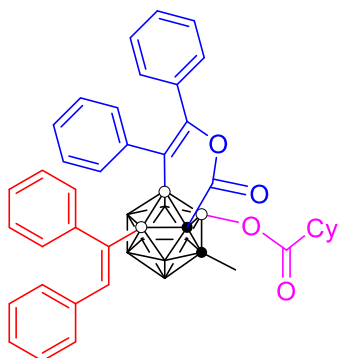

**4p**: 21.0 mg, 31% yield. Colorless oil. The crude product was purified by column chromatography on silica gel (230-400 mesh) using *n*-hexane and ethyl acetate (100/1 in V/V) as eluent.  $^1H$  NMR (500 MHz,  $CDCl_3$ ):  $\delta$  7.36-7.28 (m, 3H), 7.21-7.09 (m, 10H), 7.08-7.01 (m, 3H), 6.93-6.84 (m, 3H), 6.82-6.77 (m, 2H) (aryl & alkenyl *CH*), 2.33-2.25 (m, 1H) (Cy), 2.17 (s, 3H) (cage  $CH_3$ ), 1.91-1.80 (m, 2H), 1.70-1.60 (m, 2H), 1.42-1.02 (m, 6H) (Cy).  $^{13}C$   $\{^1H\}$  NMR (125 MHz,  $CDCl_3$ ):  $\delta$  172.9, 153.3 ( $C=O$ ), 151.8, 140.9, 140.7, 137.9, 136.8, 132.6, 129.7, 129.6, 129.4, 129.1, 128.9, 128.6, 128.3, 127.8, 127.7, 127.3, 127.0, 126.9 (aryl & alkenyl *C*), 75.8, 67.4 (cage *C*), 44.1, 29.0, 28.8, 25.4, 25.2, 25.1 (Cy), 20.8 (cage  $CH_3$ ).  $^{11}B$   $\{^1H\}$  NMR (160 MHz,  $CDCl_3$ ):  $\delta$  -3.71 (1B), -5.61 (1B), -7.02 (3B), -12.40 (1B), -14.11 (4B). HRMS (ESI)  $m/z$ :  $[M]^-$  Calcd for  $C_{39}H_{42}B_{10}O_4$  682.4110; Found 682.4098.

### Preliminary mechanistic study

#### Production distributions at different reaction times

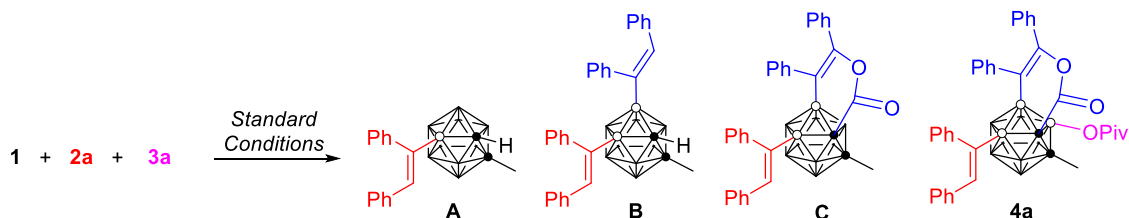

Each Schlenk flask was charged with a  $PhCF_3$  (5 mL) suspension of 1-COOH-2- $CH_3$ -*o*- $C_{2}B_{10}H_{10}$  (**1**; 10.1 mg, 0.05 mmol), diphenylacetylene (**2a**; 26.7 mg, 0.15 mmol),  $Cu(OPiv)_2$  (**3a**; 39.9 mg, 0.15 mmol),  $[Cp^*RhCl_2]_2$  (1.5 mg, 0.0025 mmol),  $AgSbF_6$  (3.4 mg, 0.01 mmol) and  $Li_2CO_3$  (22.2 mg, 0.3 mmol). The mixture was then heated at 160 °C (bath temperature) for 10 min, 15 min, 30 min, 45 min, and 60 min, respectively. After

cooling to room temperature, the reaction mixture was quenched with diluted hydrochloric acid. The organic portion was analyzed by GC-MS.

| time   | <b>1</b> (%) | <b>A</b> (%) | <b>B</b> (%) | <b>C</b> (%) | <b>4a</b> (%) |
|--------|--------------|--------------|--------------|--------------|---------------|
| 10 min | 89           | 1            | 2            | 2            | 6             |
| 15 min | 79           | 2            | 2            | 2            | 15            |
| 30 min | 4            | 2            | 4            | 6            | 84            |
| 45 min | 0            | 3            | 6            | 4            | 87            |
| 60 min | 0            | 3            | 3            | 6            | 88            |

### Control experiments

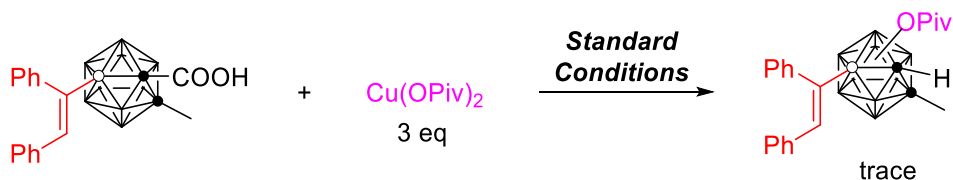

A PhCF<sub>3</sub> (5 mL) suspension of 1-COOH-2-Me-4-[(Ph)C=CH(Ph)]-*o*-C<sub>2</sub>B<sub>10</sub>H<sub>9</sub> (19.0 mg, 0.05 mmol), Cu(OPiv)<sub>2</sub> (39.9 mg, 0.15 mmol), [Cp\**Rh*Cl<sub>2</sub>]<sub>2</sub> (1.5 mg, 0.0025 mmol), AgSbF<sub>6</sub> (3.4 mg, 0.01 mmol) and Li<sub>2</sub>CO<sub>3</sub> (22.2 mg, 0.3 mmol) in a closed Schlenk flask was heated at 160 °C (bath temperature) for 2 h. After cooling to room temperature, the reaction mixture was analyzed by GC-MS. Only a trace amount of the expected acyloxylated species was observed.

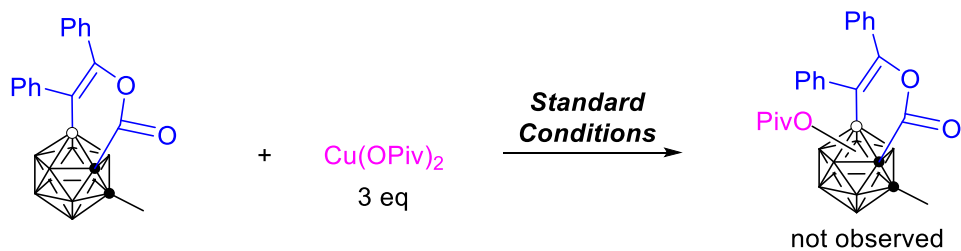

A PhCF<sub>3</sub> (5 mL) suspension of *o*-carborane-fused isocoumarin (18.9 mg, 0.05 mmol), Cu(OPiv)<sub>2</sub> (39.9 mg, 0.15 mmol), [Cp\**Rh*Cl<sub>2</sub>]<sub>2</sub> (1.5 mg, 0.0025 mmol), AgSbF<sub>6</sub> (3.4 mg, 0.01 mmol) and Li<sub>2</sub>CO<sub>3</sub> (22.2 mg, 0.3 mmol) in a closed Schlenk flask was heated at 160 °C (bath temperature) for 2 h. After cooling to room temperature, the reaction mixture was analyzed by GC-MS. No acyloxylated species was observed.

**X-ray Structure Determination.** X-ray data of **4a**, **4g**, **4i** and **4l** were collected on a Bruker SMART 1000 CCD diffractometer using Mo-K $\alpha$  radiation. An empirical absorption correction was applied using the SADABS program.<sup>3</sup> All structures were solved by direct methods and subsequent Fourier difference techniques and refined anisotropically for all non-hydrogen atoms by full-matrix least squares calculations on  $F^2$  using the SHELXTL program package.<sup>4</sup> All hydrogen atoms were geometrically fixed using the riding model.

CCDC (**4a**: 2087978, **4g**: 2087980, **4i**: 2087981 and **4l**: 2087983) contain the supplementary crystallographic data for this paper. These data can be obtained free of charge from The Cambridge Crystallographic Data Centre via [www.ccdc.cam.ac.uk/data\\_request/cif](http://www.ccdc.cam.ac.uk/data_request/cif).

## References

1. Y. Quan and Z. Xie, *J. Am. Chem. Soc.*, 2014, **136**, 15513–15516.
2. B. Cheng, Y. Chen and Z. Xie, *J. Org. Chem.* 2021, **86**, 12412-12418.
3. G. M. Sheldrick, *SADABS: Program for Empirical Absorption Correction of Area Detector Data*. (University of Göttingen: Germany, 1996).
4. G. M. Sheldrick, *SHELXTL 5.10 for Windows NT: Structure Determination Software Programs*. (Bruker Analytical X-ray Systems, Inc., Madison, Wisconsin, USA, 1997).

7.130  
7.123  
7.116  
7.112  
7.093  
7.043  
7.039  
7.030  
7.026  
7.016  
6.965  
6.960  
6.951  
6.941  
6.854  
6.799  
6.789  
6.780

— 2.183

— 1.567

— 1.142

Current Data Parameters  
NAME CY-H-A-80p  
EXPNO 1  
PROCNO 1

F2 - Acquisition Parameters  
Date\_ 20170108  
Time 12.54 h  
INSTRUM spect  
PROBHD z824601\_0021 (  
PULPROG zg30  
TD 65536  
SOLVENT CDC13  
NS 8  
DS 2  
SWH 8012.820 Hz  
FIDRES 0.122266 Hz  
AQ 4.0894465 sec  
RG 203  
DW 62.400 usec  
DE 6.50 usec  
TE 295.5 K  
D1 1.00000000 sec  
TD0 1  
SF01 400.1324708 MHz  
NUC1 1H  
P1 15.00 usec  
PLW1 8.31000042 W

F2 - Processing parameters  
SI 65536  
SF 400.1300098 MHz  
WDW EM  
SSB 0  
LB 0.30 Hz  
GB 0  
PC 1.00

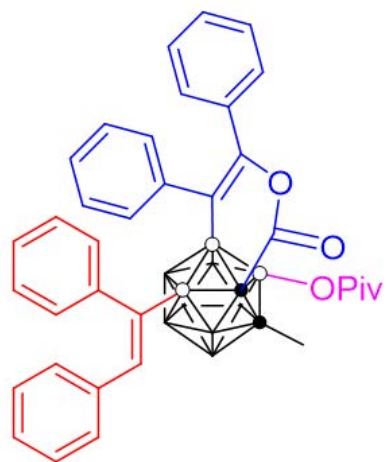

4a

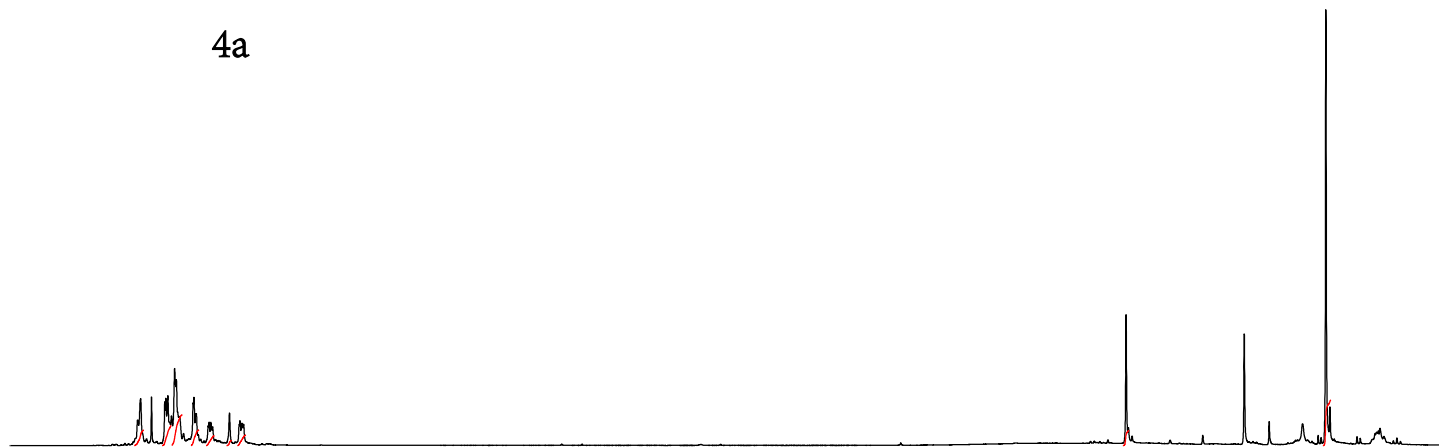

7.5 7.0 6.5 6.0 5.5 5.0 4.5 4.0 3.5 3.0 2.5 2.0 1.5 ppm

3.03  
4.03  
6.03  
3.09  
1.95  
1.00  
2.06

3.00

8.82

175.77  
 153.43  
 151.88  
 141.14  
 140.82  
 138.17  
 136.98  
 132.70  
 129.79  
 129.57  
 129.22  
 129.07  
 128.76  
 128.52  
 127.97  
 127.96  
 127.91  
 127.41  
 127.13  
 127.04

77.47  
 77.15  
 76.83  
 76.10  
 67.38

39.91

27.18

20.98

CY-C-A-81p

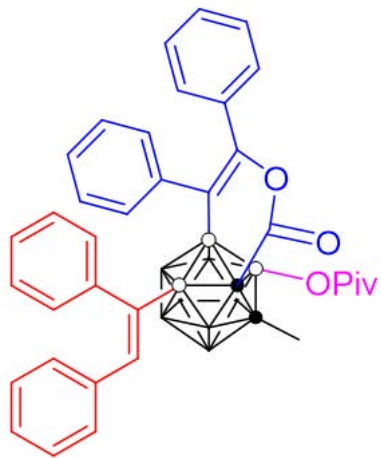

Current Data Parameters  
 NAME CY-C-A-81P  
 EXPNO 1  
 PROCNO 1

F2 - Acquisition Parameters  
 Date\_ 20170108  
 Time 10.09 h  
 INSTRUM spect  
 PROBHD Z108618\_0257 (  
 PULPROG zgpg30  
 TD 65536  
 SOLVENT CDC13  
 NS 3072  
 DS 4  
 SWH 40760.871 Hz  
 FIDRES 0.621962 Hz  
 AQ 0.8039083 sec  
 RG 161  
 DW 12.267 usec  
 DE 6.50 usec  
 TE 294.9 K  
 D1 2.0000000 sec  
 D11 0.03000000 sec  
 TD0 1  
 SFO1 100.6479773 MHz  
 NUC1 13C  
 P1 9.50 usec  
 PLW1 55.3400015 W  
 SFO2 400.2316009 MHz  
 NUC2 1H  
 CPDPRG[2] waltz16  
 PCPD2 90.00 usec  
 PLW2 13.56000042 W  
 PLW12 0.27428001 W  
 PLW13 0.13796000 W

F2 - Processing parameters  
 SI 32768  
 SF 100.6379021 MHz  
 WDW EM  
 SSB 0  
 LB 1.00 Hz  
 GB 0  
 PC 1.40

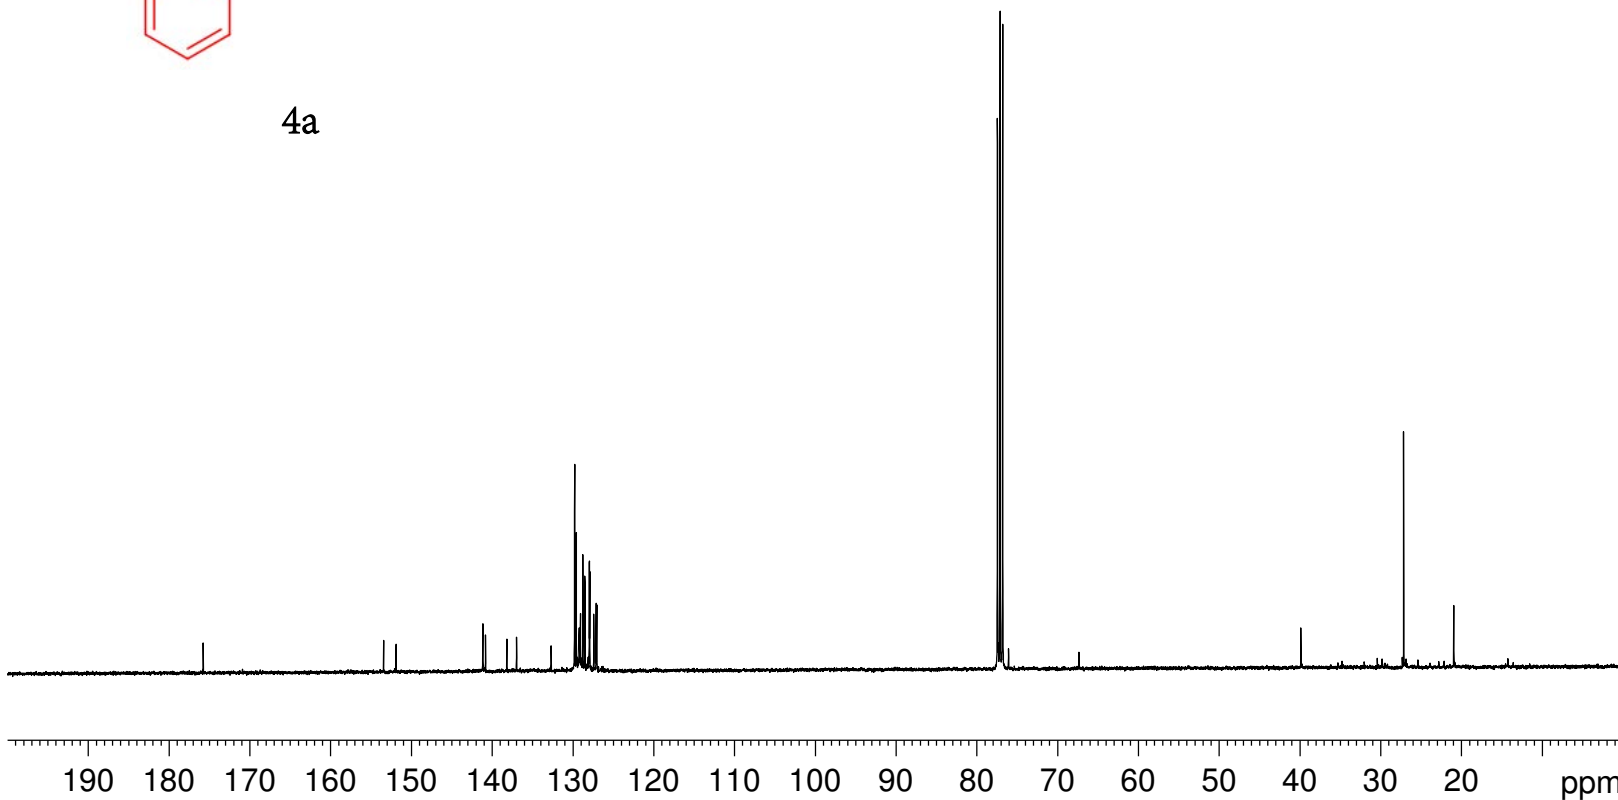

# $^{11}\text{B}\{^1\text{H}\}$ NMR

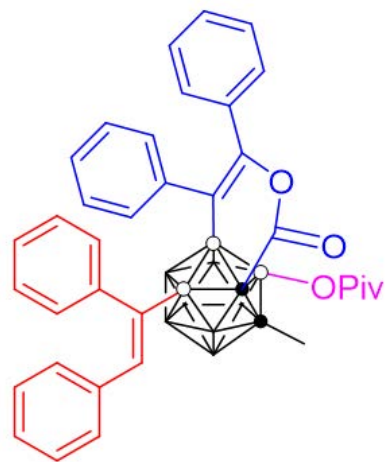

4a

— -3.81  
— -6.00  
— -7.09  
— -14.17

CY-B-A-81p

Current Data Parameters  
NAME CY-B-A-81p  
EXPNO 1  
PROCNO 1

F2 - Acquisition Parameters  
Date\_ 20170228  
Time 18.44 h  
INSTRUM spect  
PROBHD Z108618\_0257 (  
PULPROG zgdc  
TD 65536  
SOLVENT CDCl3  
NS 64  
DS 4  
SWH 24038.461 Hz  
FIDRES 0.366798 Hz  
AQ 1.3631488 sec  
RG 406  
DW 20.800 usec  
DE 6.50 usec  
TE 295.6 K  
D1 2.00000000 sec  
D11 0.03000000 sec  
TD0 1  
SFO1 128.4096890 MHz  
NUC1  $^{11}\text{B}$   
P1 7.50 usec  
PLW1 55.09999847 W  
SFO2 400.2316009 MHz  
NUC2  $^1\text{H}$   
CPDPRG[2] waltz16  
PCPD2 90.00 usec  
PLW2 13.56000042 W  
PLW12 0.27428001 W

F2 - Processing parameters  
SI 32768  
SF 128.4097615 MHz  
WDW EM  
SSB 0  
LB 1.00 Hz  
GB 0  
PC 1.40

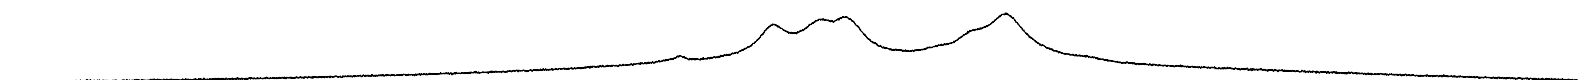

1.12  
1.98  
1.94  
5.00

25 20 15 10 5 0 -5 -10 -15 -20 -25 -30 -35 ppm

# $^{11}\text{B}$ NMR

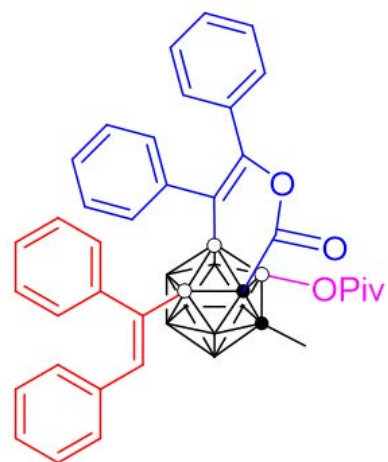

4a

— -3.65  
— -6.36  
— -13.33

CY-B-A-81p-(C)

Current Data Parameters  
NAME CY-B-A-81p-(C)  
EXPNO 1  
PROCNO 1

F2 - Acquisition Parameters  
Date\_ 20170228  
Time 18.50 h  
INSTRUM spect  
PROBHD Z108618\_0257 (  
PULPROG zg  
TD 65536  
SOLVENT CDCl3  
NS 88  
DS 2  
SWH 24038.461 Hz  
FIDRES 0.366798 Hz  
AQ 1.3631488 sec  
RG 362  
DW 20.800 usec  
DE 6.50 usec  
TE 294.7 K  
D1 2.00000000 sec  
TD0 1  
SFO1 128.4096890 MHz  
NUC1 11B  
P1 7.50 usec  
PLW1 55.09999847 W

F2 - Processing parameters  
SI 32768  
SF 128.4097430 MHz  
WDW EM  
SSB 0  
LB 1.00 Hz  
GB 0  
PC 1.40

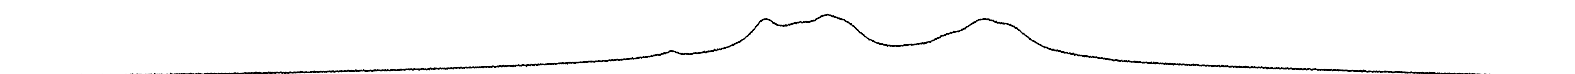

25 20 15 10 5 0 -5 -10 -15 -20 -25 -30 -35 ppm

7.043  
7.022  
6.994  
6.989  
6.974  
6.968  
6.922  
6.902  
6.852  
6.839  
6.832  
6.819  
6.779  
6.701  
6.680

2.389  
2.303  
2.239  
2.190  
2.157  
1.568  
1.128

Current Data Parameters  
NAME CY-H-A-96p  
EXPNO 1  
PROCNO 1

F2 - Acquisition Parameters  
Date\_ 20170318  
Time 9.50 h  
INSTRUM spect  
PROBHD z824601\_0021 (  
PULPROG zg30  
TD 65536  
SOLVENT CDC13  
NS 16  
DS 2  
SWH 8012.820 Hz  
FIDRES 0.122266 Hz  
AQ 4.0894465 sec  
RG 203  
DW 62.400 usec  
DE 6.50 usec  
TE 295.4 K  
D1 1.00000000 sec  
TD0 1  
SFO1 400.1324708 MHz  
NUC1 1H  
P1 15.00 usec  
PLW1 8.31000042 W

F2 - Processing parameters  
SI 65536  
SF 400.1300099 MHz  
WDW EM  
SSB 0  
LB 0.30 Hz  
GB 0  
PC 1.00

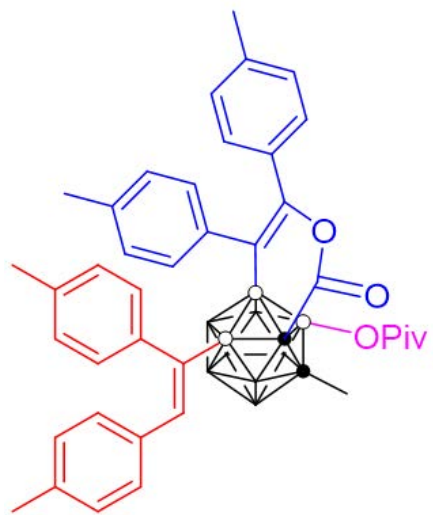

4b

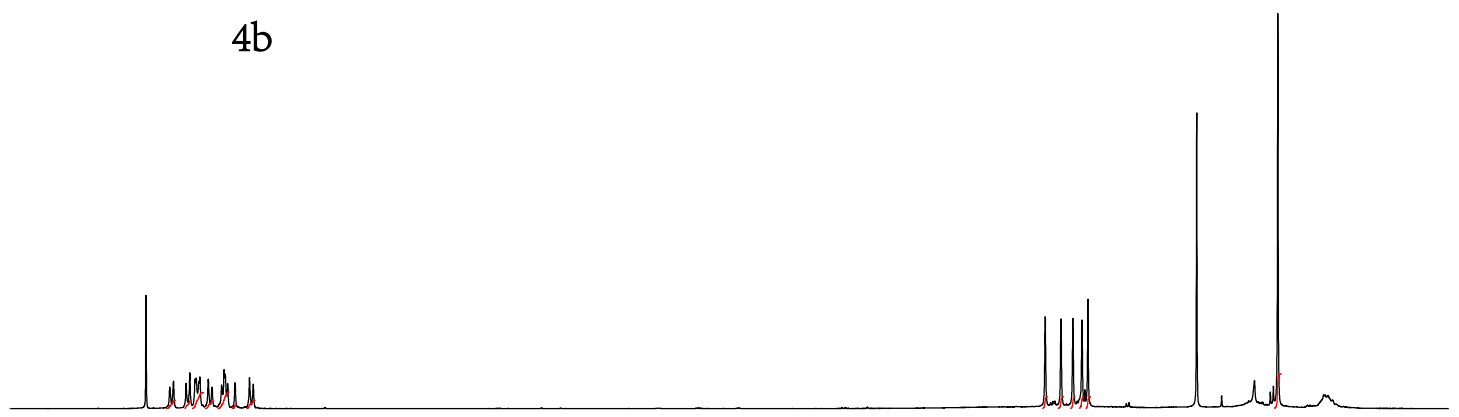

7.5 7.0 6.5 6.0 5.5 5.0 4.5 4.0 3.5 3.0 2.5 2.0 1.5 1.0 ppm

2.05  
2.05  
3.97  
2.04  
4.09  
1.00  
2.03

2.99  
3.02  
2.96  
3.03  
2.94

8.60



CY-C-A-96Rh-4-Me

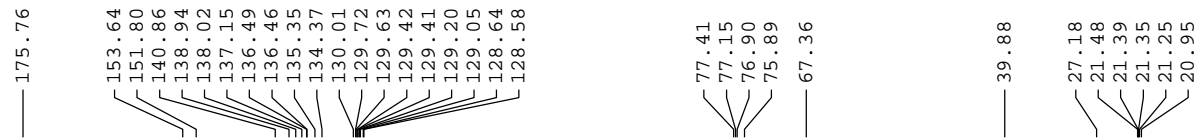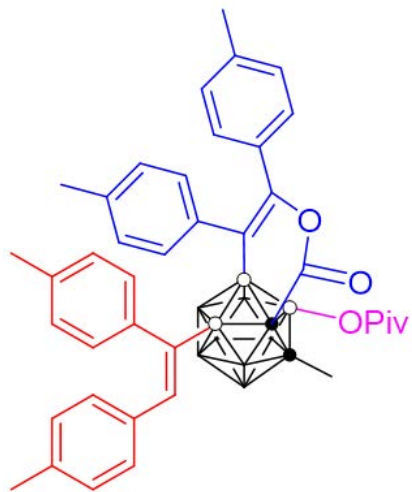

4b

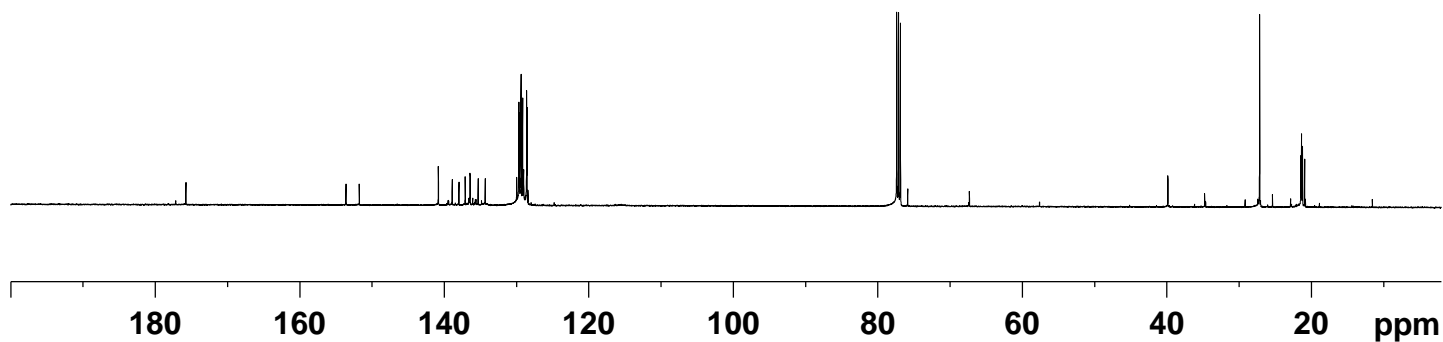

Current Data Parameters  
 NAME CY-C-A-96Rh-4-Me  
 EXPNO 1  
 PROCNO 1

F2 - Acquisition Parameters

Date\_ 20200609  
 Time 2.05 h  
 INSTRUM spect  
 PROBHD Z119470\_0283 (  
 PULPROG zgpg30  
 TD 65536  
 SOLVENT CDCl3  
 NS 4000  
 DS 4  
 SWH 29761.904 Hz  
 FIDRES 0.908261 Hz  
 AQ 1.1010048 sec  
 RG 206.72  
 DW 16.800 usec  
 DE 6.50 usec  
 TE 295.1 K  
 D1 2.0000000 sec  
 D11 0.0300000 sec  
 TD0 1  
 SFO1 125.7703643 MHz  
 NUC1 13C  
 P1 9.75 usec  
 PLW1 94.0000000 W  
 SFO2 500.1320005 MHz  
 NUC2 1H  
 CPDPRG[2] waltz16  
 PCPD2 80.00 usec  
 PLW2 25.0000000 W  
 PLW12 0.39063001 W  
 PLW13 0.19648001 W

F2 - Processing parameters

SI 32768  
 SF 125.7577781 MHz  
 WDW EM  
 SSB 0  
 LB 1.00 Hz  
 GB 0  
 PC 1.40

# $^{11}\text{B}\{^1\text{H}\}$ NMR

CY-B-A-96Rh-4-Me

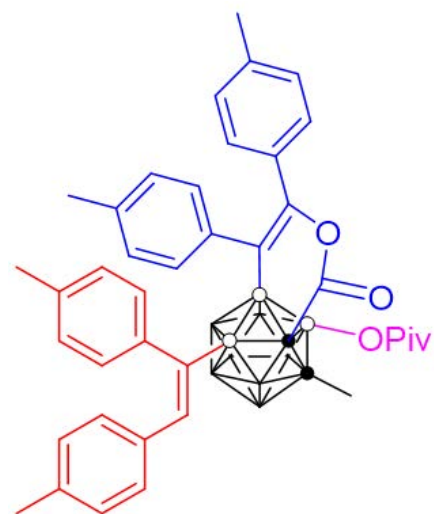

4b

— -3.55  
— -6.65  
— -13.85

Current Data Parameters  
NAME CY-B-A-96Rh-4-Me  
EXPNO 1  
PROCNO 1

F2 - Acquisition Parameters  
Date\_ 20200609  
Time 2.11 h  
INSTRUM spect  
PROBHD Z119470\_0283 (  
PULPROG zgpg30  
TD 32768  
SOLVENT CDCl3  
NS 160  
DS 4  
SWH 24038.461 Hz  
FIDRES 1.467191 Hz  
AQ 0.6815744 sec  
RG 206.72  
DW 20.800 usec  
DE 6.50 usec  
TE 295.1 K  
D1 1.00000000 sec  
D11 0.03000000 sec  
TD0 1  
SFO1 160.4615790 MHz  
NUC1  $^{11}\text{B}$   
P1 16.00 usec  
PLW1 50.00000000 W  
SFO2 500.1320005 MHz  
NUC2  $^1\text{H}$   
CPDPRG[2] waltz16  
PCPD2 80.00 usec  
PLW2 25.00000000 W  
PLW12 0.39063001 W  
PLW13 0.19648001 W

F2 - Processing parameters  
SI 16384  
SF 160.4615999 MHz  
WDW EM  
SSB 0  
LB 1.00 Hz  
GB 0  
PC 1.40

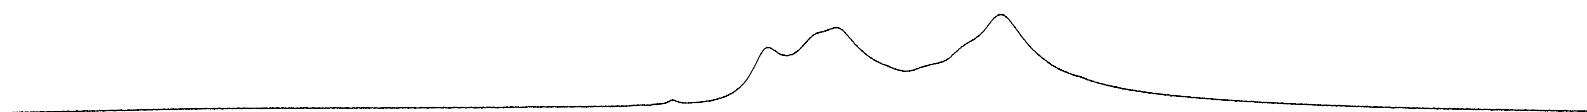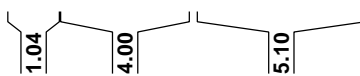

25 20 15 10 5 0 -5 -10 -15 -20 -25 -30 -35 ppm

# $^{11}\text{B}$ NMR

CY-B-A-96Rh-4-Me-(C)

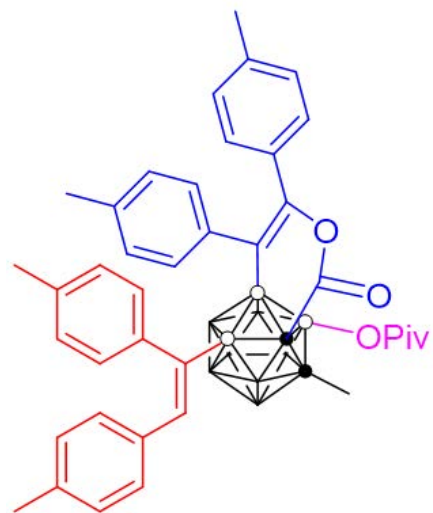

4b

— -3.52  
— -6.22  
— -13.62

Current Data Parameters  
NAME CY-B-A-96Rh-4-Me-(C)  
EXPNO 1  
PROCNO 1

F2 - Acquisition Parameters  
Date\_ 20200609  
Time 2.20 h  
INSTRUM spect  
PROBHD Z119470\_0283 (  
PULPROG zg  
TD 32768  
SOLVENT CDCl3  
NS 320  
DS 4  
SWH 24038.461 Hz  
FIDRES 1.467191 Hz  
AQ 0.6815744 sec  
RG 206.72  
DW 20.800 usec  
DE 6.50 usec  
TE 295.1 K  
D1 1.00000000 sec  
TD0 1  
SFO1 160.4615792 MHz  
NUC1  $^{11}\text{B}$   
P1 16.00 usec  
PLW1 50.00000000 W

F2 - Processing parameters  
SI 16384  
SF 160.4615997 MHz  
WDW EM  
SSB 0  
LB 1.00 Hz  
GB 0  
PC 1.40

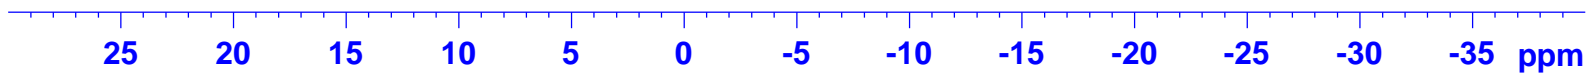

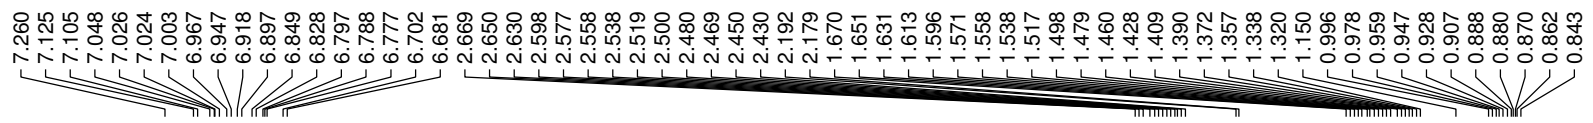

CY-H-A-116p-p

Current Data Parameters  
 NAME CY-H-A-116p-p  
 EXPNO 1  
 PROCNO 1

F2 - Acquisition Parameters  
 Date\_ 20170825  
 Time 21.14 h  
 INSTRUM spect  
 PROBHD Z108618\_0257 (  
 PULPROG zg30  
 TD 65536  
 SOLVENT CDCl3  
 NS 12  
 DS 2  
 SWH 8012.820 Hz  
 FIDRES 0.122266 Hz  
 AQ 4.0894465 sec  
 RG 50.8  
 DW 62.400 usec  
 DE 6.50 usec  
 TE 294.7 K  
 D1 1.00000000 sec  
 TD0 1  
 SFO1 400.2324714 MHz  
 NUC1 1H  
 P1 12.80 usec  
 PLW1 13.56000042 W

F2 - Processing parameters  
 SI 65536  
 SF 400.2300103 MHz  
 WDW EM  
 SSB 0  
 LB 0.30 Hz  
 GB 0  
 PC 1.00

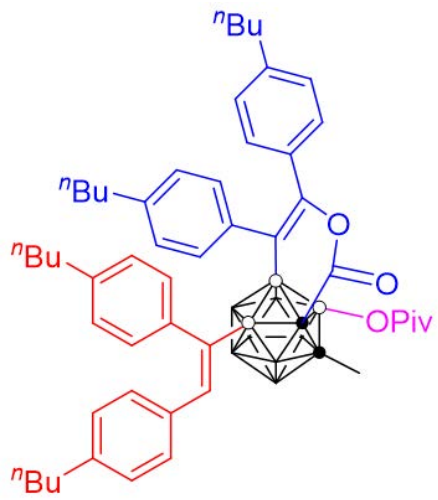

4c

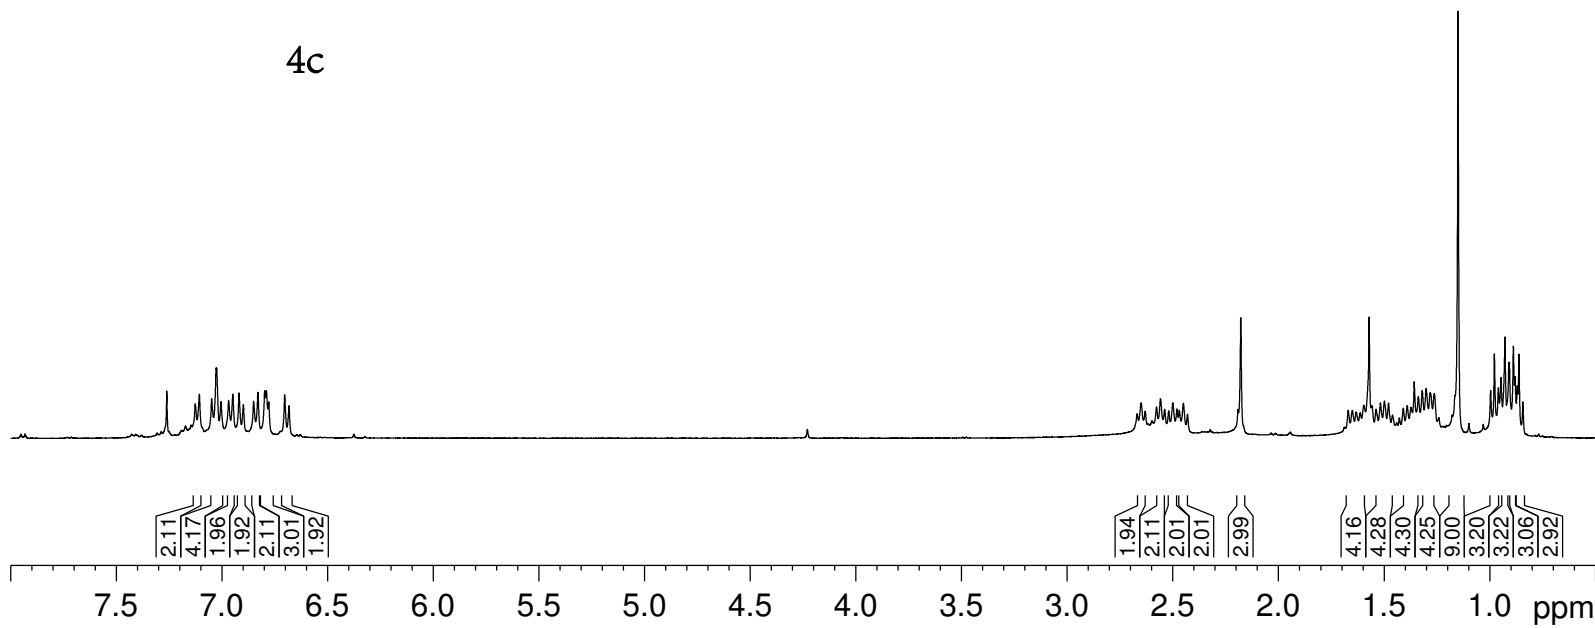

CY-C-A-116P-Rh

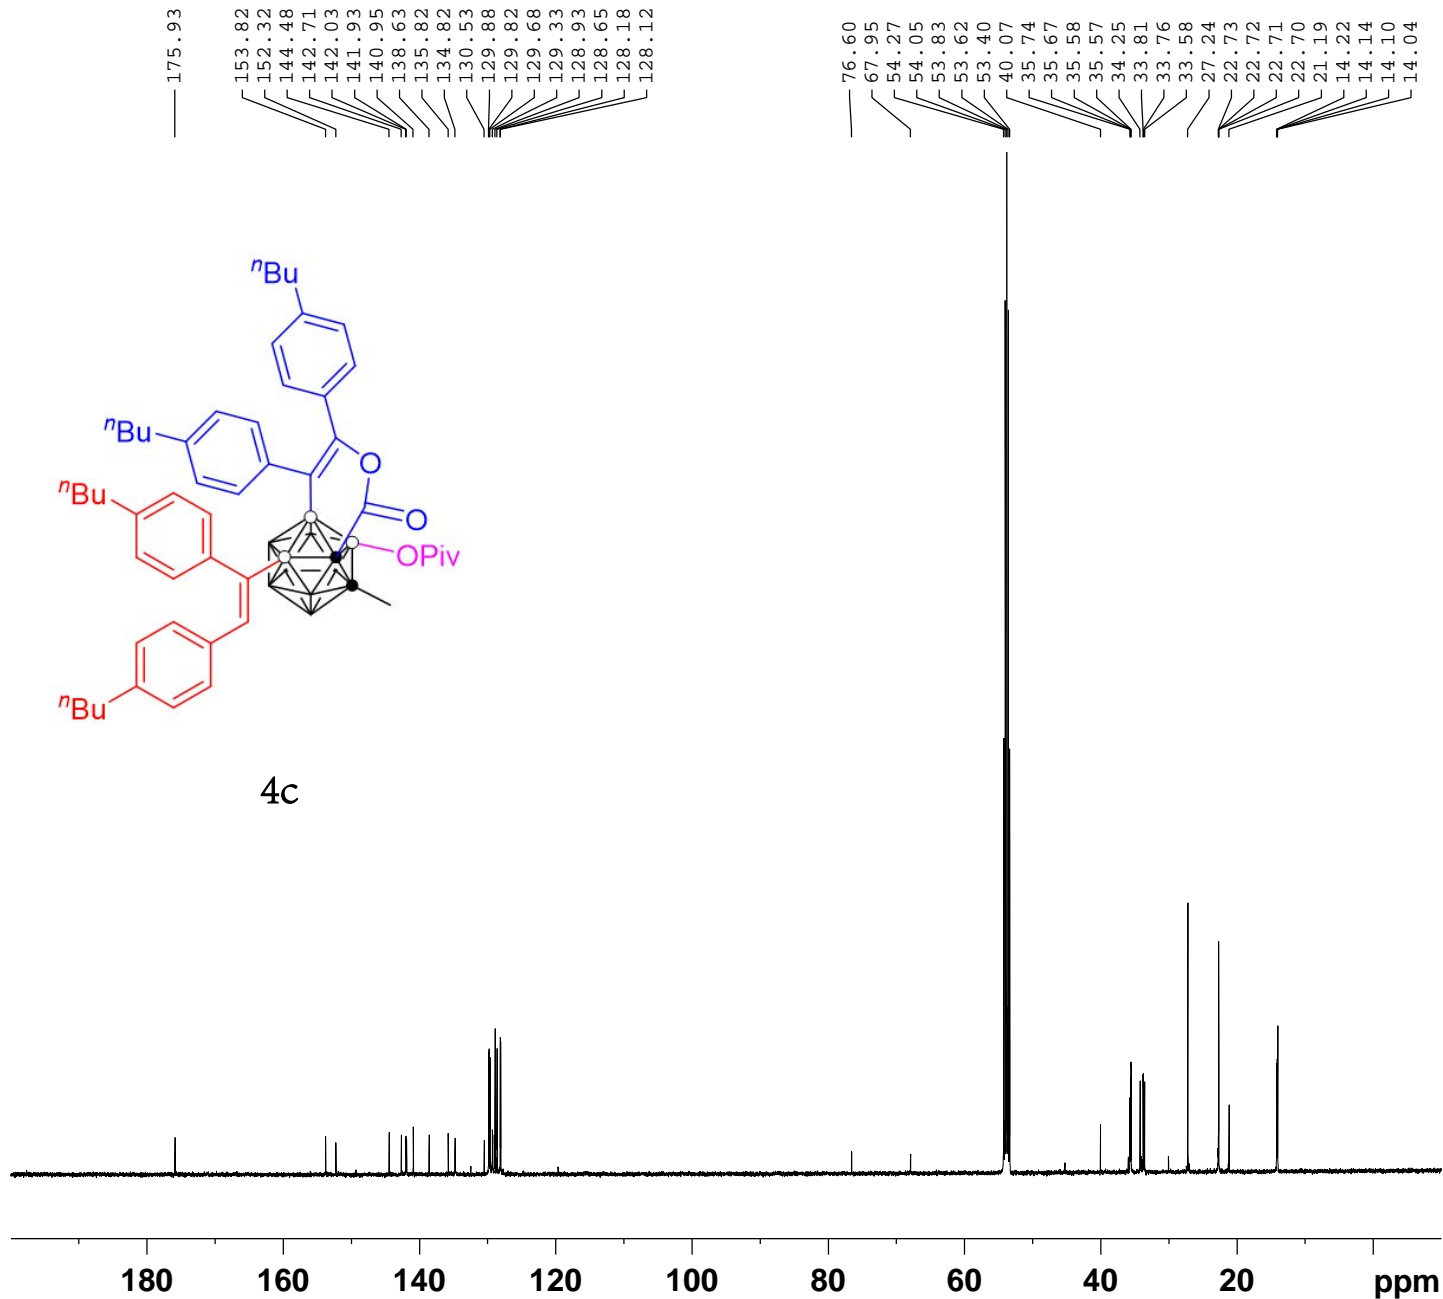

Current Data Parameters  
 NAME CY-C-A-116P-Rh  
 EXPNO 1  
 PROCNO 1

F2 - Acquisition Parameters

Date\_ 20200623  
 Time 18.30 h  
 INSTRUM spect  
 PROBHD Z119470\_0283 (  
 PULPROG zgpg30  
 TD 65536  
 SOLVENT CD2Cl2  
 NS 2100  
 DS 4  
 SWH 29761.904 Hz  
 FIDRES 0.908261 Hz  
 AQ 1.1010048 sec  
 RG 206.72  
 DW 16.800 usec  
 DE 6.50 usec  
 TE 295.1 K  
 D1 2.0000000 sec  
 D11 0.03000000 sec  
 TD0 1  
 SFO1 125.7703643 MHz  
 NUC1 13C  
 P1 9.75 usec  
 PLW1 94.0000000 W  
 SFO2 500.1320005 MHz  
 NUC2 1H  
 CPDPRG[2] waltz16  
 PCPD2 80.00 usec  
 PLW2 25.0000000 W  
 PLW12 0.39063001 W  
 PLW13 0.19648001 W

F2 - Processing parameters

SI 32768  
 SF 125.7577393 MHz  
 WDW EM  
 SSB 0  
 LB 1.00 Hz  
 GB 0  
 PC 1.40

# $^{11}\text{B}\{^1\text{H}\}$ NMR

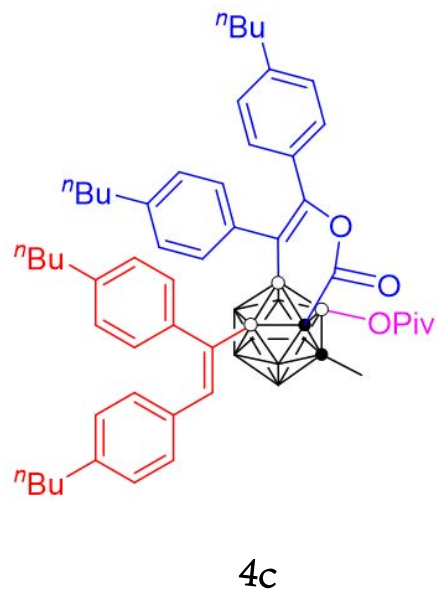

— -3.91  
— -6.40  
— -14.34

CY-B-A-116p-p

Current Data Parameters  
NAME CY-B-A-116p-p  
EXPNO 1  
PROCNO 1

F2 - Acquisition Parameters  
Date\_ 20170825  
Time 21.18 h  
INSTRUM spect  
PROBHD Z108618\_0257 (  
PULPROG zgdc  
TD 65536  
SOLVENT CDCl3  
NS 64  
DS 4  
SWH 24038.461 Hz  
FIDRES 0.366798 Hz  
AQ 1.3631488 sec  
RG 406  
DW 20.800 usec  
DE 6.50 usec  
TE 295.2 K  
D1 2.00000000 sec  
D11 0.03000000 sec  
TD0 1  
SFO1 128.4096890 MHz  
NUC1  $^{11}\text{B}$   
P1 7.50 usec  
PLW1 55.09999847 W  
SFO2 400.2316009 MHz  
NUC2  $^1\text{H}$   
CPDPRG[2] waltz16  
PCPD2 90.00 usec  
PLW2 13.56000042 W  
PLW12 0.27428001 W

F2 - Processing parameters  
SI 32768  
SF 128.4097615 MHz  
WDW EM  
SSB 0  
LB 1.00 Hz  
GB 0  
PC 1.40

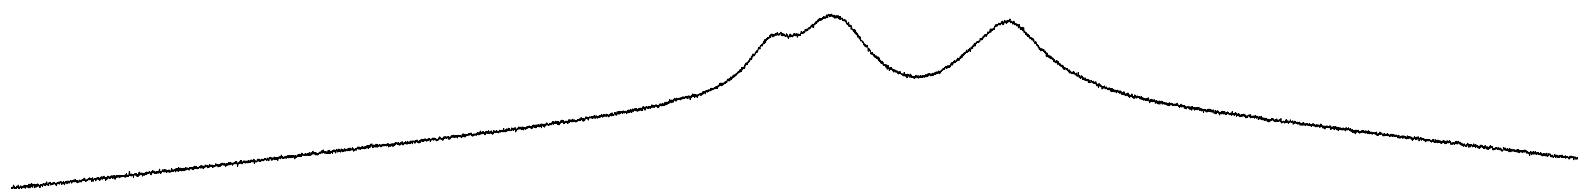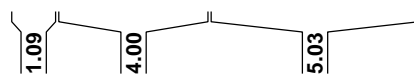

25 20 15 10 5 0 -5 -10 -15 -20 -25 -30 -35 ppm

# $^{11}\text{B}$ NMR

CY-B-A-116p-p- (C)

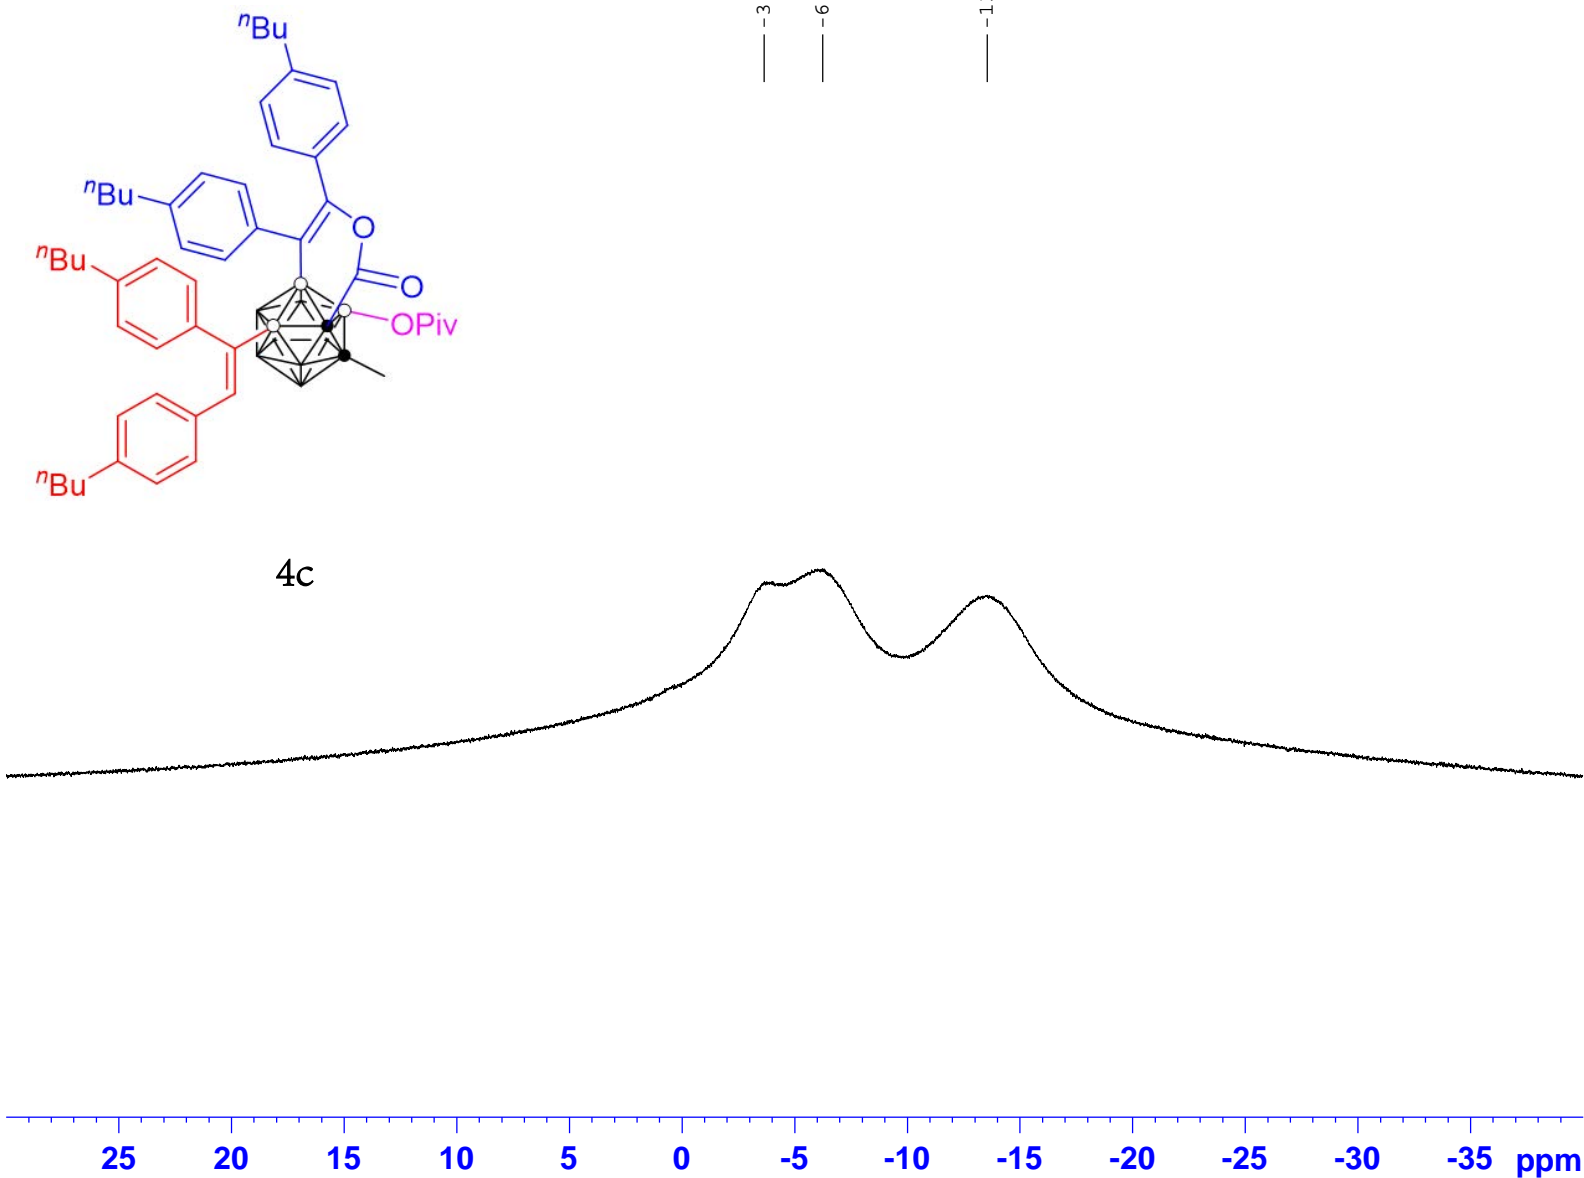

Current Data Parameters  
NAME CY-B-A-116p-p- (C)  
EXPNO 1  
PROCNO 1

F2 - Acquisition Parameters  
Date\_ 20170825  
Time 21.24 h  
INSTRUM spect  
PROBHD Z108618\_0257 (  
PULPROG zg  
TD 65536  
SOLVENT CDCl3  
NS 128  
DS 2  
SWH 24038.461 Hz  
FIDRES 0.366798 Hz  
AQ 1.3631488 sec  
RG 406  
DW 20.800 usec  
DE 6.50 usec  
TE 294.8 K  
D1 2.00000000 sec  
TD0 1  
SF01 128.4096890 MHz  
NUC1 11B  
P1 7.50 usec  
PLW1 55.09999847 W

F2 - Processing parameters  
SI 32768  
SF 128.4097430 MHz  
WDW EM  
SSB 0  
LB 1.00 Hz  
GB 0  
PC 1.40

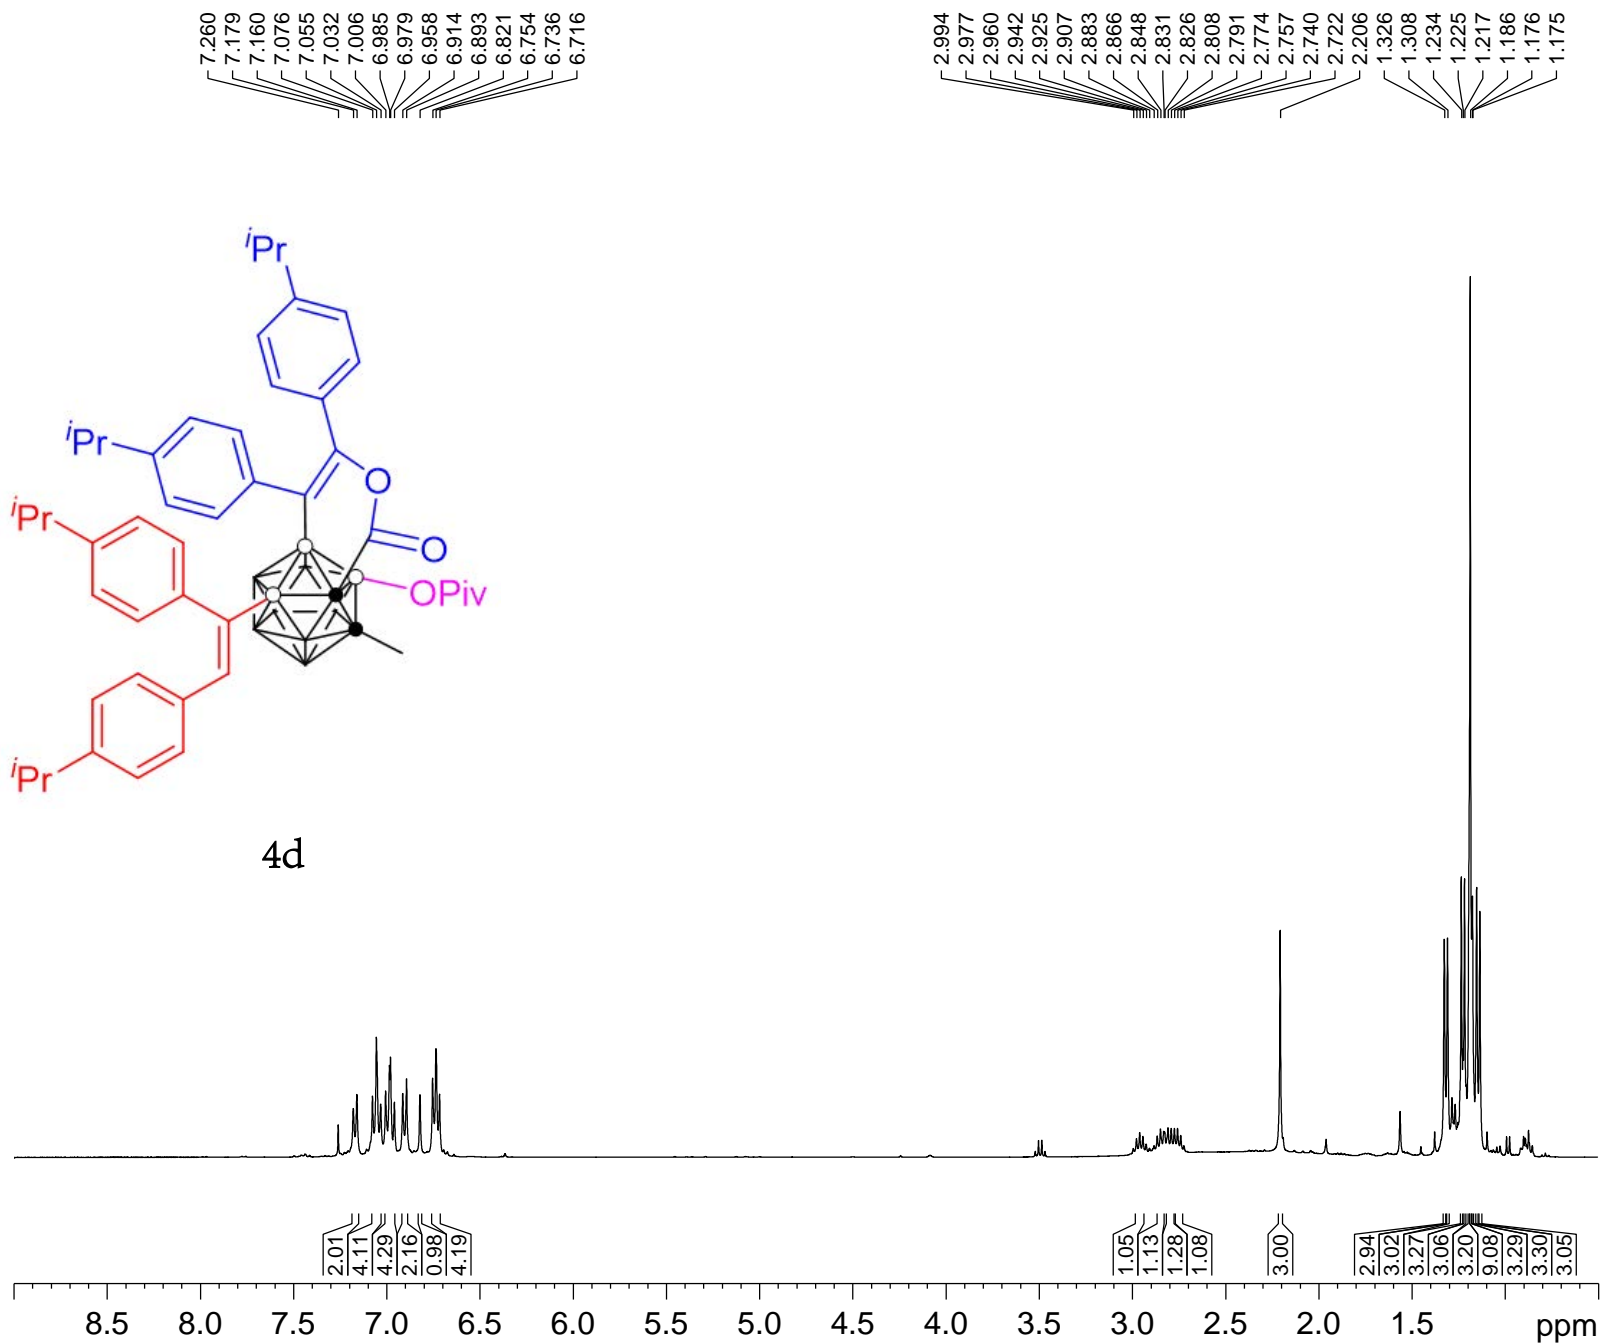

CY-H-A-91Rh

Current Data Parameters  
 NAME CY-H-A-91Rh  
 EXPNO 1  
 PROCNO 1

F2 - Acquisition Parameters  
 Date\_ 20170703  
 Time 17.11 h  
 INSTRUM spect  
 PROBHD Z108618\_0257 ( )  
 PULPROG zg30  
 TD 65536  
 SOLVENT CDCl3  
 NS 12  
 DS 2  
 SWH 8012.820 Hz  
 FIDRES 0.122266 Hz  
 AQ 4.0894465 sec  
 RG 32  
 DW 62.400 usec  
 DE 6.50 usec  
 TE 295.4 K  
 D1 1.00000000 sec  
 TD0 1  
 SFO1 400.2324714 MHz  
 NUC1 1H  
 P1 12.80 usec  
 PLW1 13.56000042 W

F2 - Processing parameters  
 SI 65536  
 SF 400.2300108 MHz  
 WDW EM  
 SSB 0  
 LB 0.30 Hz  
 GB 0  
 PC 1.00



CY-C-A-91Rh

Current Data Parameters  
NAME CY-C-A-91Rh  
EXPNO 1  
PROCNO 1

F2 - Acquisition Parameters  
Date\_ 20170703  
Time 17.23 h  
INSTRUM spect  
PROBHD z108618\_0257 (  
PULPROG zgpg30  
TD 65536  
SOLVENT CDCl3  
NS 152  
DS 4  
SWH 40760.871 Hz  
FIDRES 0.621962 Hz  
AQ 0.8039083 sec  
RG 203  
DW 12.267 usec  
DE 6.50 usec  
TE 295.6 K  
D1 2.00000000 sec  
D11 0.03000000 sec  
TD0 1  
SFO1 100.6479773 MHz  
NUC1 13C  
P1 9.50 usec  
PLW1 55.34000015 W  
SFO2 400.2316009 MHz  
NUC2 1H  
CPDPRG[2] waltz16  
PCPD2 90.00 usec  
PLW2 13.56000042 W  
PLW12 0.27428001 W  
PLW13 0.13796000 W

F2 - Processing parameters  
SI 32768  
SF 100.6379034 MHz  
WDW EM  
SSB 0  
LB 1.00 Hz  
GB 0  
PC 1.40

175.77  
153.73  
151.73  
149.60  
148.09  
147.57  
147.25  
140.41  
138.55  
135.51  
134.77  
130.30  
129.90  
129.58  
129.47  
129.06  
126.69  
126.41  
125.99  
125.82

77.47  
77.15  
76.84  
75.97  
67.65

39.89  
33.96  
33.88  
33.82  
33.74  
27.25  
24.31  
24.03  
23.87  
23.78  
21.02

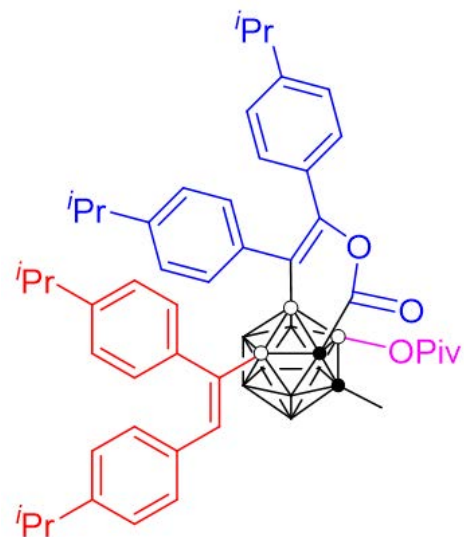

4d

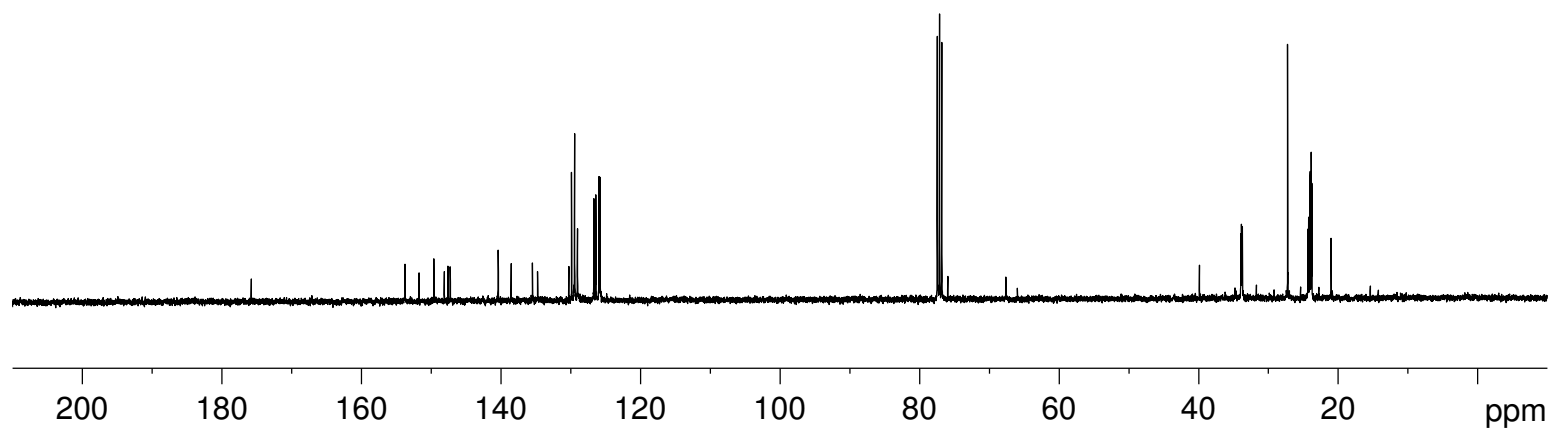

# $^{11}\text{B}\{^1\text{H}\}$ NMR

CY-B-A-91Rh-1

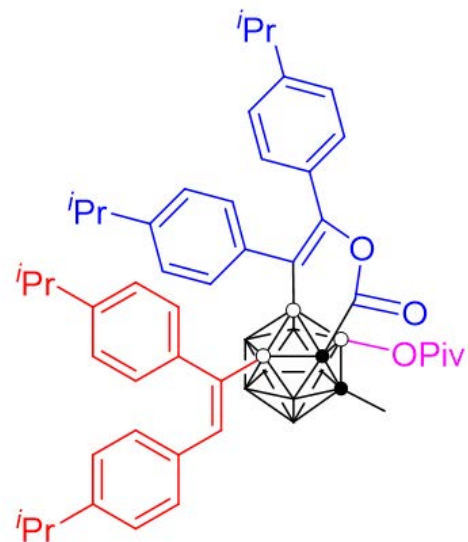

4d

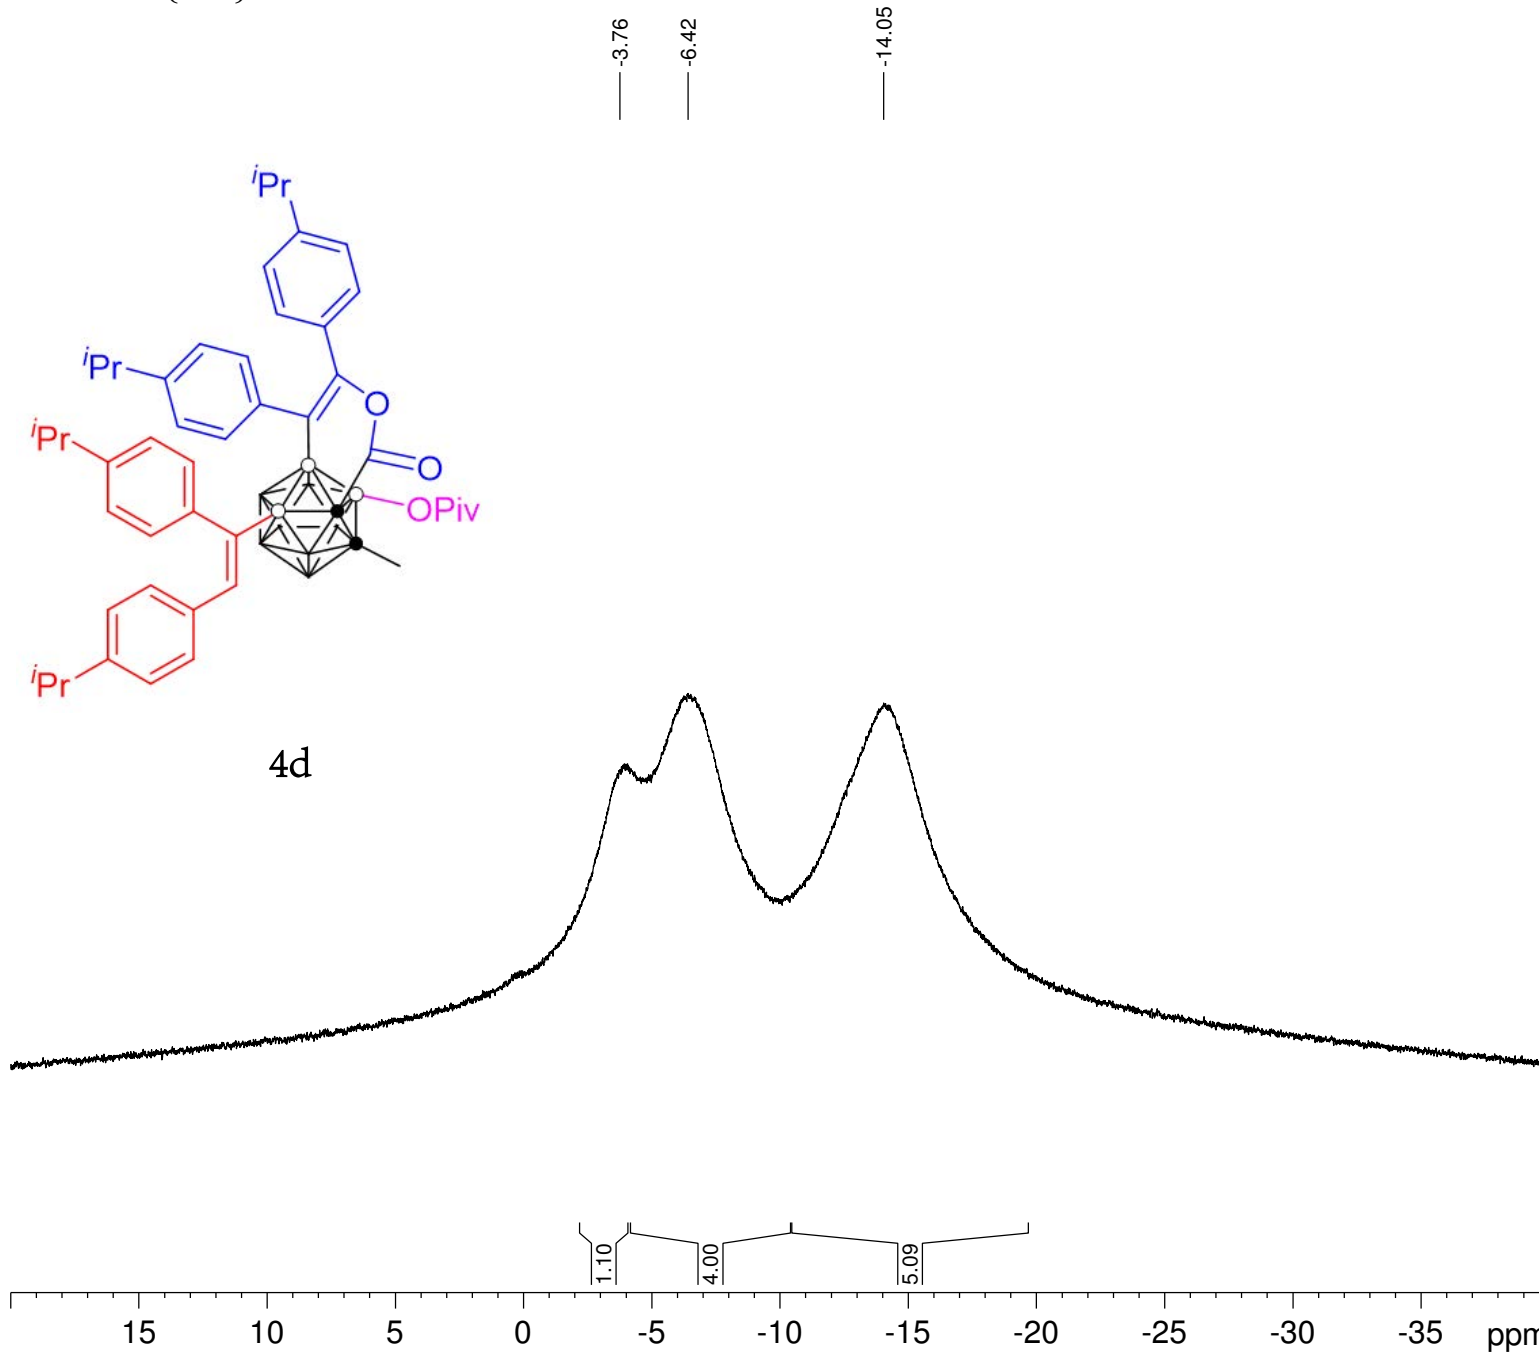

Current Data Parameters  
NAME CY-B-A-91Rh-1  
EXPNO 1  
PROCNO 1

F2 - Acquisition Parameters  
Date\_ 20170703  
Time 17.14 h  
INSTRUM spect  
PROBHD z108618\_0257 (  
PULPROG zgdc  
TD 65536  
SOLVENT CDC13  
NS 24  
DS 4  
SWH 24038.461 Hz  
FIDRES 0.366798 Hz  
AQ 1.3631488 sec  
RG 322  
DW 20.800 usec  
DE 6.50 usec  
TE 295.9 K  
D1 2.00000000 sec  
D11 0.03000000 sec  
TD0 1  
SFO1 128.4096890 MHz  
NUC1 11B  
P1 7.50 usec  
PLW1 55.09999847 W  
SFO2 400.2316009 MHz  
NUC2 1H  
CPDPRG[2] waltz16  
PCPD2 90.00 usec  
PLW2 13.56000042 W  
PLW12 0.27428001 W

F2 - Processing parameters  
SI 32768  
SF 128.4097615 MHz  
WDW EM  
SSB 0  
LB 1.00 Hz  
GB 0  
PC 1.40

# $^{11}\text{B}$ NMR

CY-B-A-91Rh-1- (C)

Current Data Parameters  
NAME CY-B-A-91Rh-1- (C)  
EXPNO 1  
PROCNO 1

F2 - Acquisition Parameters  
Date\_ 20170703  
Time 17.16 h  
INSTRUM spect  
PROBHD z108618\_0257 (   
PULPROG zg  
TD 65536  
SOLVENT CDC13  
NS 32  
DS 2  
SWH 24038.461 Hz  
FIDRES 0.366798 Hz  
AQ 1.3631488 sec  
RG 256  
DW 20.800 usec  
DE 6.50 usec  
TE 295.4 K  
D1 2.00000000 sec  
TD0 1  
SFO1 128.4096890 MHz  
NUC1  $^{11}\text{B}$   
P1 7.50 usec  
PLW1 55.09999847 W

F2 - Processing parameters  
SI 32768  
SF 128.4097430 MHz  
WDW EM  
SSB 0  
LB 1.00 Hz  
GB 0  
PC 1.40

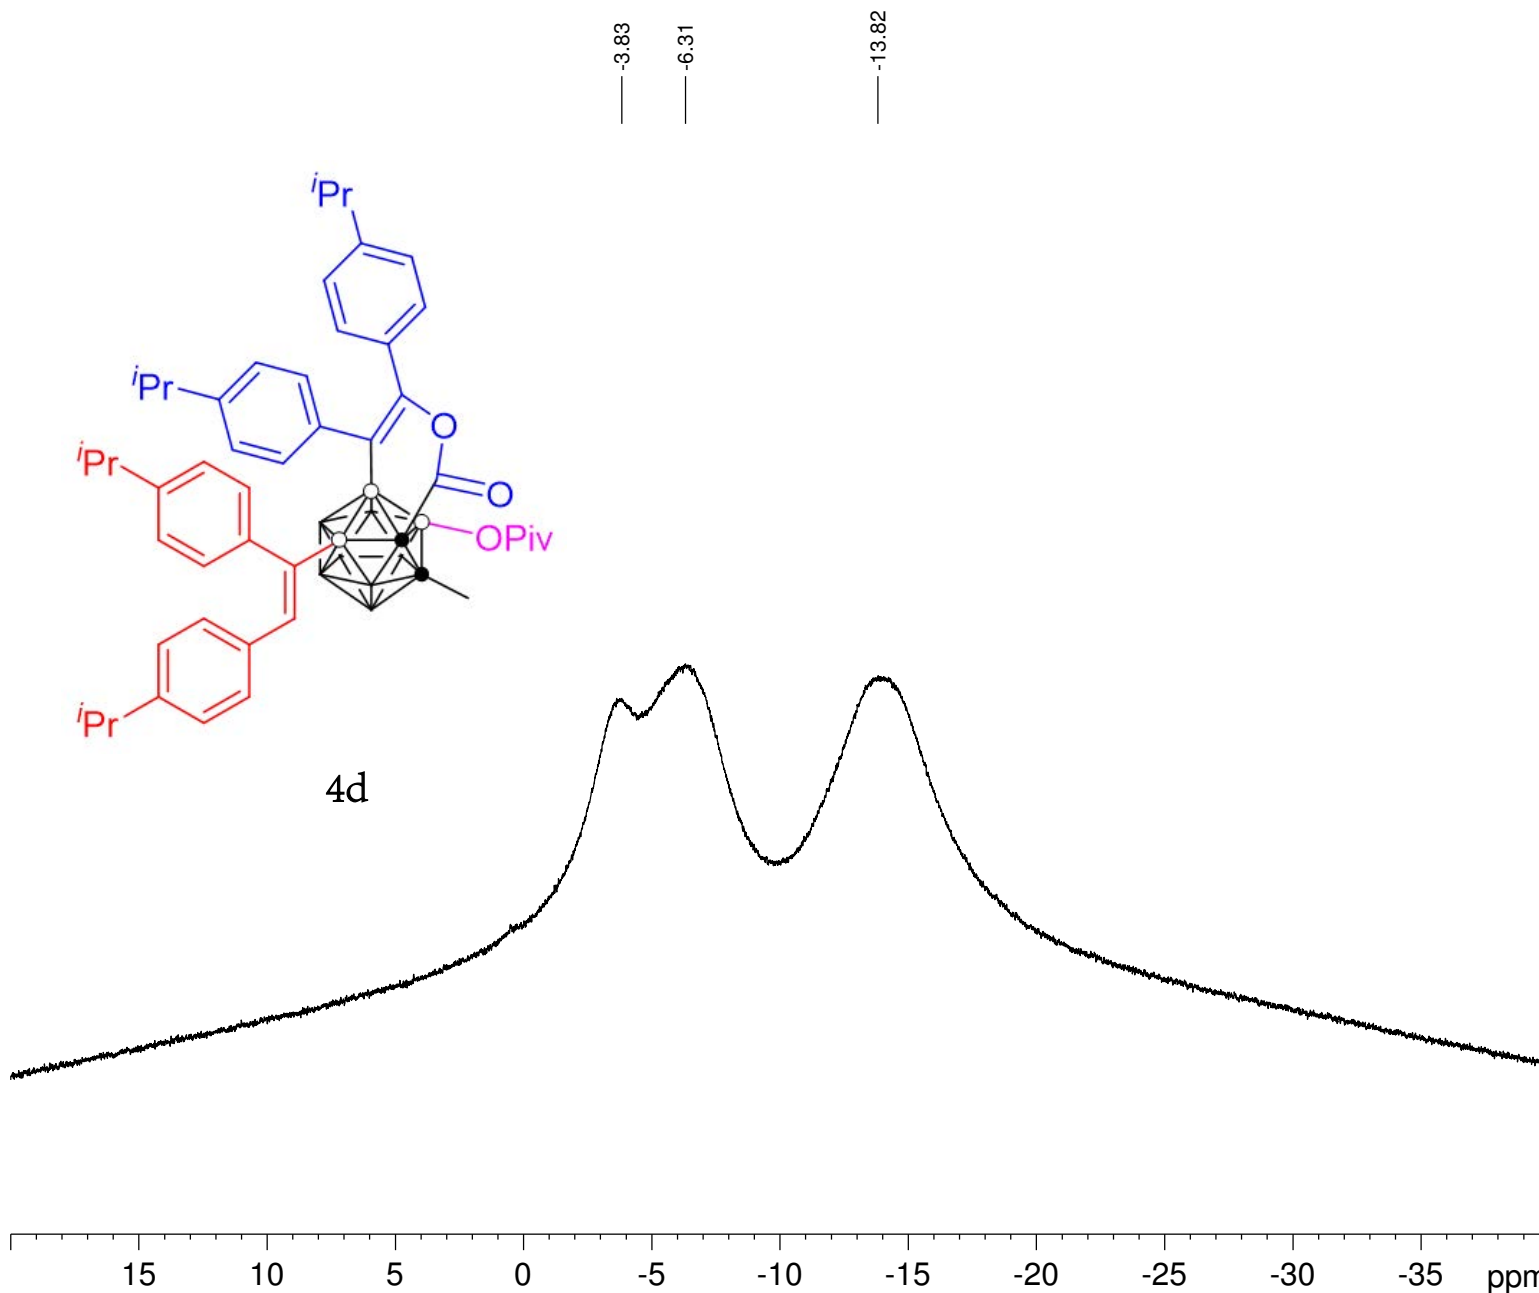

7.260  
7.129  
7.108  
7.104  
7.082  
7.070  
7.049  
7.040  
7.029  
7.019  
7.000  
6.980  
6.814  
6.783  
6.761  
6.755  
6.734  
6.694  
6.686  
6.665

2.195  
1.953  
1.563  
1.361  
1.347  
1.267  
1.231  
1.216  
1.194  
1.181

CY-H-A-95p

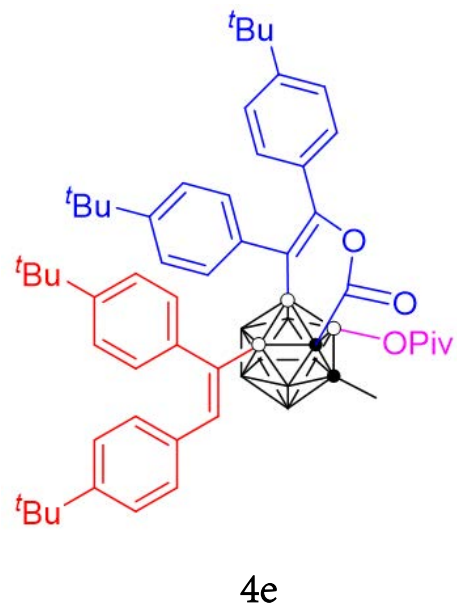

Current Data Parameters

NAME CY-H-A-95p  
EXPNO 1  
PROCNO 1

F2 - Acquisition Parameters

Date\_ 20170317  
Time 18.54 h  
INSTRUM spect  
PROBHD Z108618\_0257 (  
PULPROG zg30  
TD 65536  
SOLVENT CDCl3  
NS 12  
DS 2  
SWH 8012.820 Hz  
FIDRES 0.122266 Hz  
AQ 4.0894465 sec  
RG 71.8  
DW 62.400 usec  
DE 6.50 usec  
TE 294.6 K  
D1 1.0000000 sec  
TD0 1  
SFO1 400.2324714 MHz  
NUC1 1H  
P1 12.80 usec  
PLW1 13.56000042 W

F2 - Processing parameters

SI 65536  
SF 400.2300103 MHz  
WDW EM  
SSB 0  
LB 0.30 Hz  
GB 0  
PC 1.00

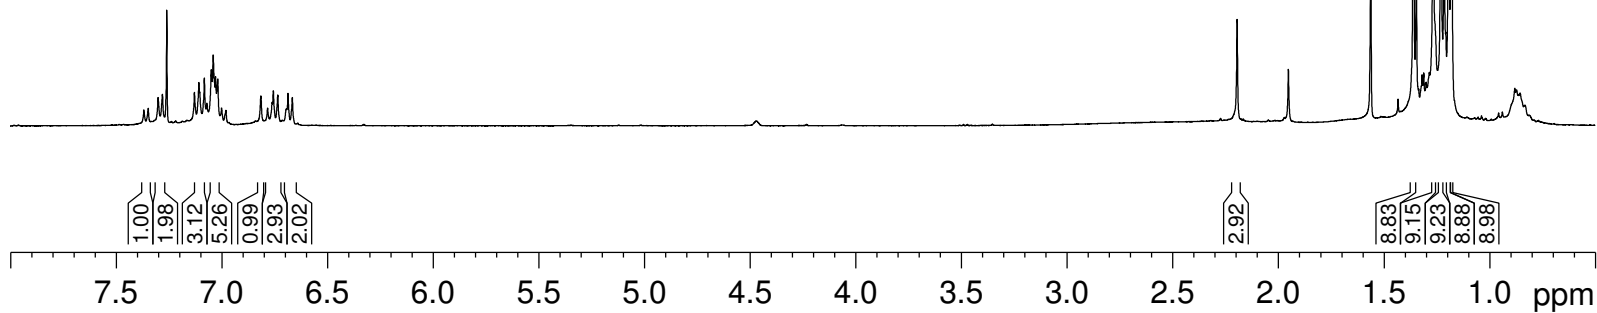

CY-C-A-95Rh-tBu

177.44  
 155.44  
 153.98  
 153.62  
 152.36  
 151.82  
 151.63  
 141.90  
 140.03  
 136.93  
 136.07  
 131.79  
 131.24  
 131.05  
 130.94  
 130.59  
 127.29  
 127.00  
 126.66  
 126.58

78.20  
 69.73  
 55.75  
 55.54  
 55.32  
 55.10  
 54.89  
 41.60  
 36.42  
 36.36  
 36.23  
 36.20  
 33.16  
 32.94  
 32.77  
 32.73  
 28.83  
 22.76

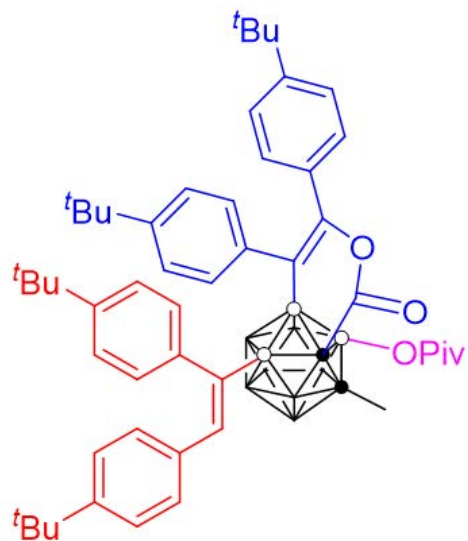

4e

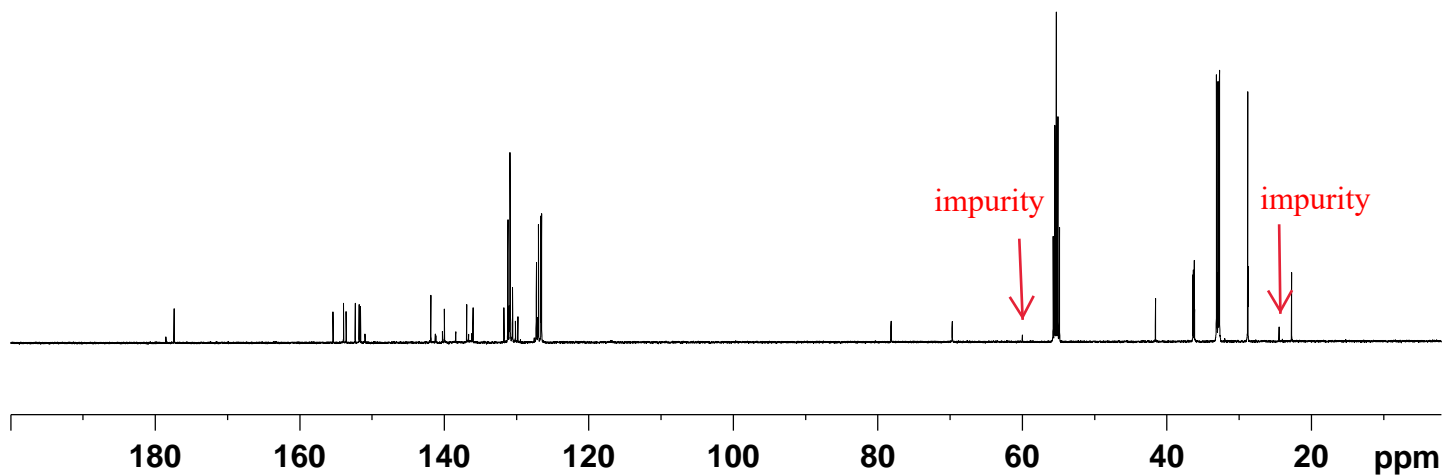

Current Data Parameters  
 NAME CY-C-A-95Rh-tBu  
 EXPNO 1  
 PROCNO 1

F2 - Acquisition Parameters

Date\_ 20200615  
 Time 23.27 h  
 INSTRUM spect  
 PROBHD Z119470\_0283 (  
 PULPROG zgpg30  
 TD 65536  
 SOLVENT CDCl3  
 NS 1024  
 DS 4  
 SWH 29761.904 Hz  
 FIDRES 0.908261 Hz  
 AQ 1.1010048 sec  
 RG 206.72  
 DW 16.800 usec  
 DE 6.50 usec  
 TE 295.2 K  
 D1 2.0000000 sec  
 D11 0.0300000 sec  
 TD0 1  
 SFO1 125.7703643 MHz  
 NUC1 13C  
 P1 9.75 usec  
 PLW1 94.0000000 W  
 SFO2 500.1320005 MHz  
 NUC2 1H  
 CPDPRG[2] waltz16  
 PCPD2 80.00 usec  
 PLW2 25.0000000 W  
 PLW12 0.39063001 W  
 PLW13 0.19648001 W

F2 - Processing parameters

SI 32768  
 SF 125.7577927 MHz  
 WDW EM  
 SSB 0  
 LB 1.00 Hz  
 GB 0  
 PC 1.40

# $^{11}\text{B}\{^1\text{H}\}$ NMR

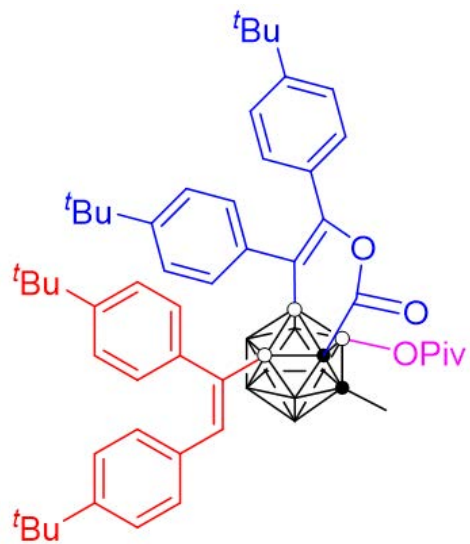

4e

— -2.99  
— -5.36  
— -13.26

CY-B-A-95Rh-1

Current Data Parameters  
NAME CY-B-A-95Rh-1  
EXPNO 1  
PROCNO 1

F2 - Acquisition Parameters  
Date\_ 20200610  
Time 18.59 h  
INSTRUM spect  
PROBHD Z108618\_0257 (  
PULPROG zgdc  
TD 65536  
SOLVENT CDCl3  
NS 57  
DS 4  
SWH 24038.461 Hz  
FIDRES 0.366798 Hz  
AQ 1.3631488 sec  
RG 406  
DW 20.800 usec  
DE 6.50 usec  
TE 295.1 K  
D1 2.00000000 sec  
D11 0.03000000 sec  
TD0 1  
SFO1 128.4096890 MHz  
NUC1  $^{11}\text{B}$   
P1 7.50 usec  
PLW1 55.09999847 W  
SFO2 400.2316009 MHz  
NUC2  $^1\text{H}$   
CPDPRG[2] waltz16  
PCPD2 90.00 usec  
PLW2 13.56000042 W  
PLW12 0.27428001 W

F2 - Processing parameters  
SI 32768  
SF 128.4097615 MHz  
WDW EM  
SSB 0  
LB 1.00 Hz  
GB 0  
PC 1.40

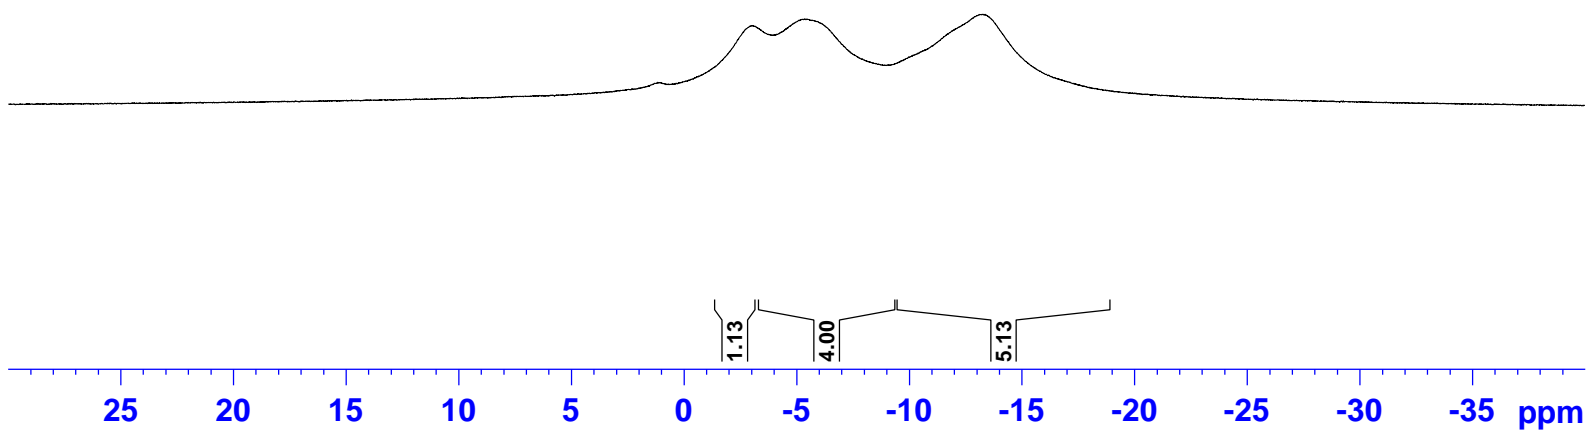

# $^{11}\text{B}$ NMR

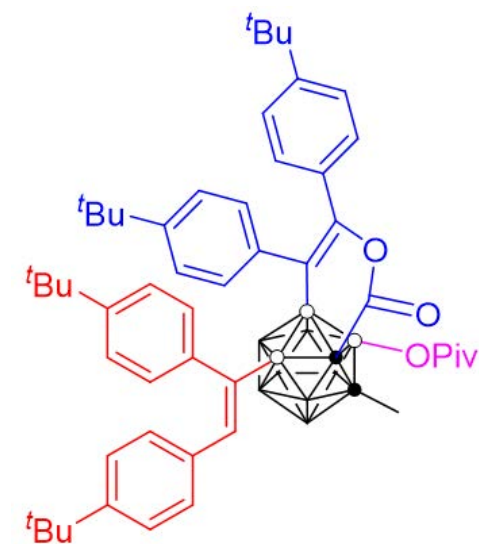

4e

— -2.92  
— -5.56  
— -12.75

CY-B-A-95Rh-1-(C)

Current Data Parameters  
NAME CY-B-A-95Rh-1-(C)  
EXPNO 1  
PROCNO 1

F2 - Acquisition Parameters  
Date\_ 20200610  
Time 19.07 h  
INSTRUM spect  
PROBHD Z108618\_0257 (  
PULPROG zg  
TD 65536  
SOLVENT CDCl3  
NS 126  
DS 2  
SWH 24038.461 Hz  
FIDRES 0.366798 Hz  
AQ 1.3631488 sec  
RG 406  
DW 20.800 usec  
DE 6.50 usec  
TE 294.5 K  
D1 2.00000000 sec  
TD0 1  
SF01 128.4096890 MHz  
NUC1 11B  
P1 7.50 usec  
PLW1 55.09999847 W

F2 - Processing parameters  
SI 32768  
SF 128.4097430 MHz  
WDW EM  
SSB 0  
LB 1.00 Hz  
GB 0  
PC 1.40

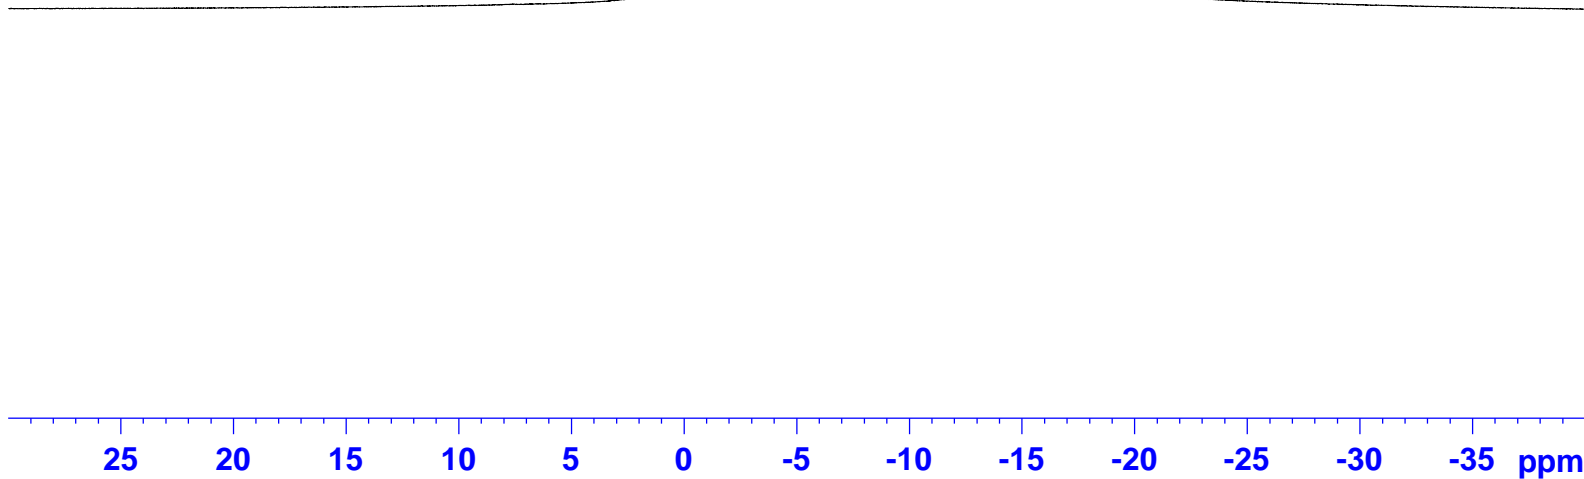

7.001  
6.983  
6.963  
6.934  
6.919  
6.893  
6.887  
6.870  
6.852  
6.837  
6.755  
6.711  
6.692  
6.663  
6.642  
6.564  
6.547  
6.519  
6.370  
5.322  
5.320  
5.318

2.267  
2.200  
2.171  
2.158  
2.100  
1.542  
1.175

Current Data Parameters  
NAME CY-H-A-97P-Rh  
EXPNO 1  
PROCNO 1

F2 - Acquisition Parameters  
Date\_ 20200624  
Time 19.04 h  
INSTRUM spect  
PROBHD Z820201\_0170 (  
PULPROG zg30  
TD 65536  
SOLVENT CD2C12  
NS 16  
DS 2  
SWH 8012.820 Hz  
FIDRES 0.244532 Hz  
AQ 4.0894465 sec  
RG 203  
DW 62.400 usec  
DE 6.50 usec  
TE 296.9 K  
D1 1.00000000 sec  
TD0 1  
SFO1 400.1324708 MHz  
NUC1 1H  
P1 6.75 usec  
PLW1 13.17700005 W

F2 - Processing parameters  
SI 65536  
SF 400.1300154 MHz  
WDW EM  
SSB 0  
LB 0.30 Hz  
GB 0  
PC 1.00

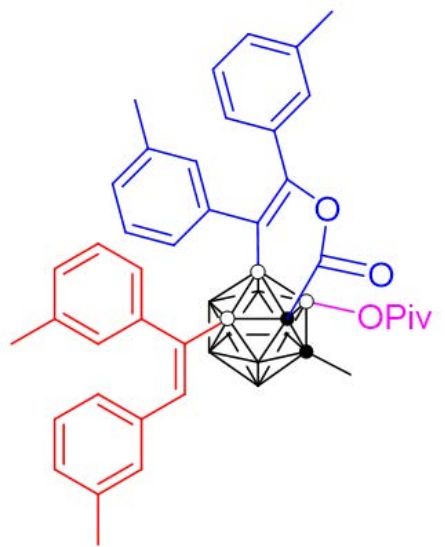

4f

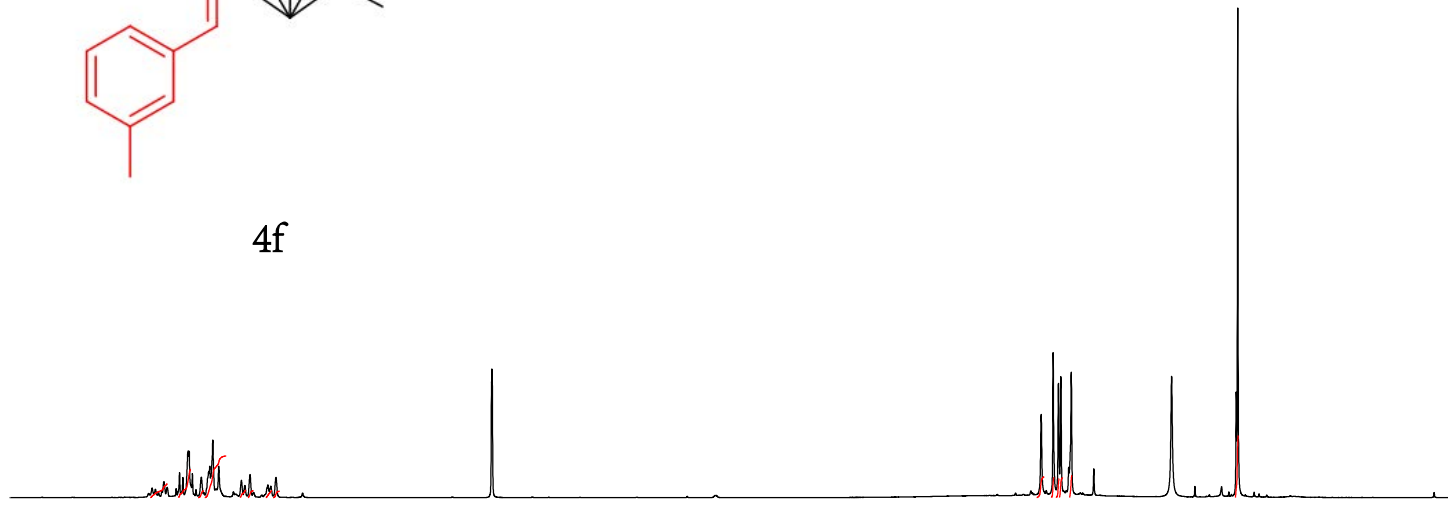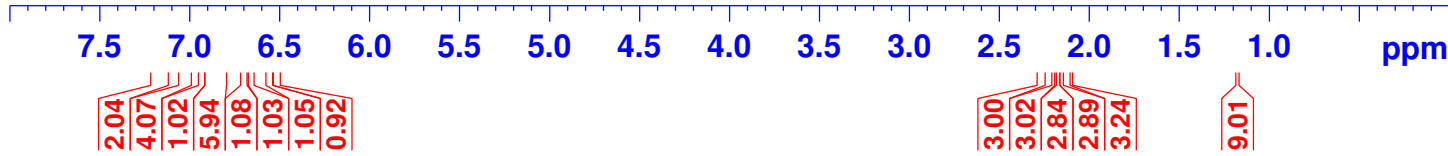



CY-C-A-97P-Rh

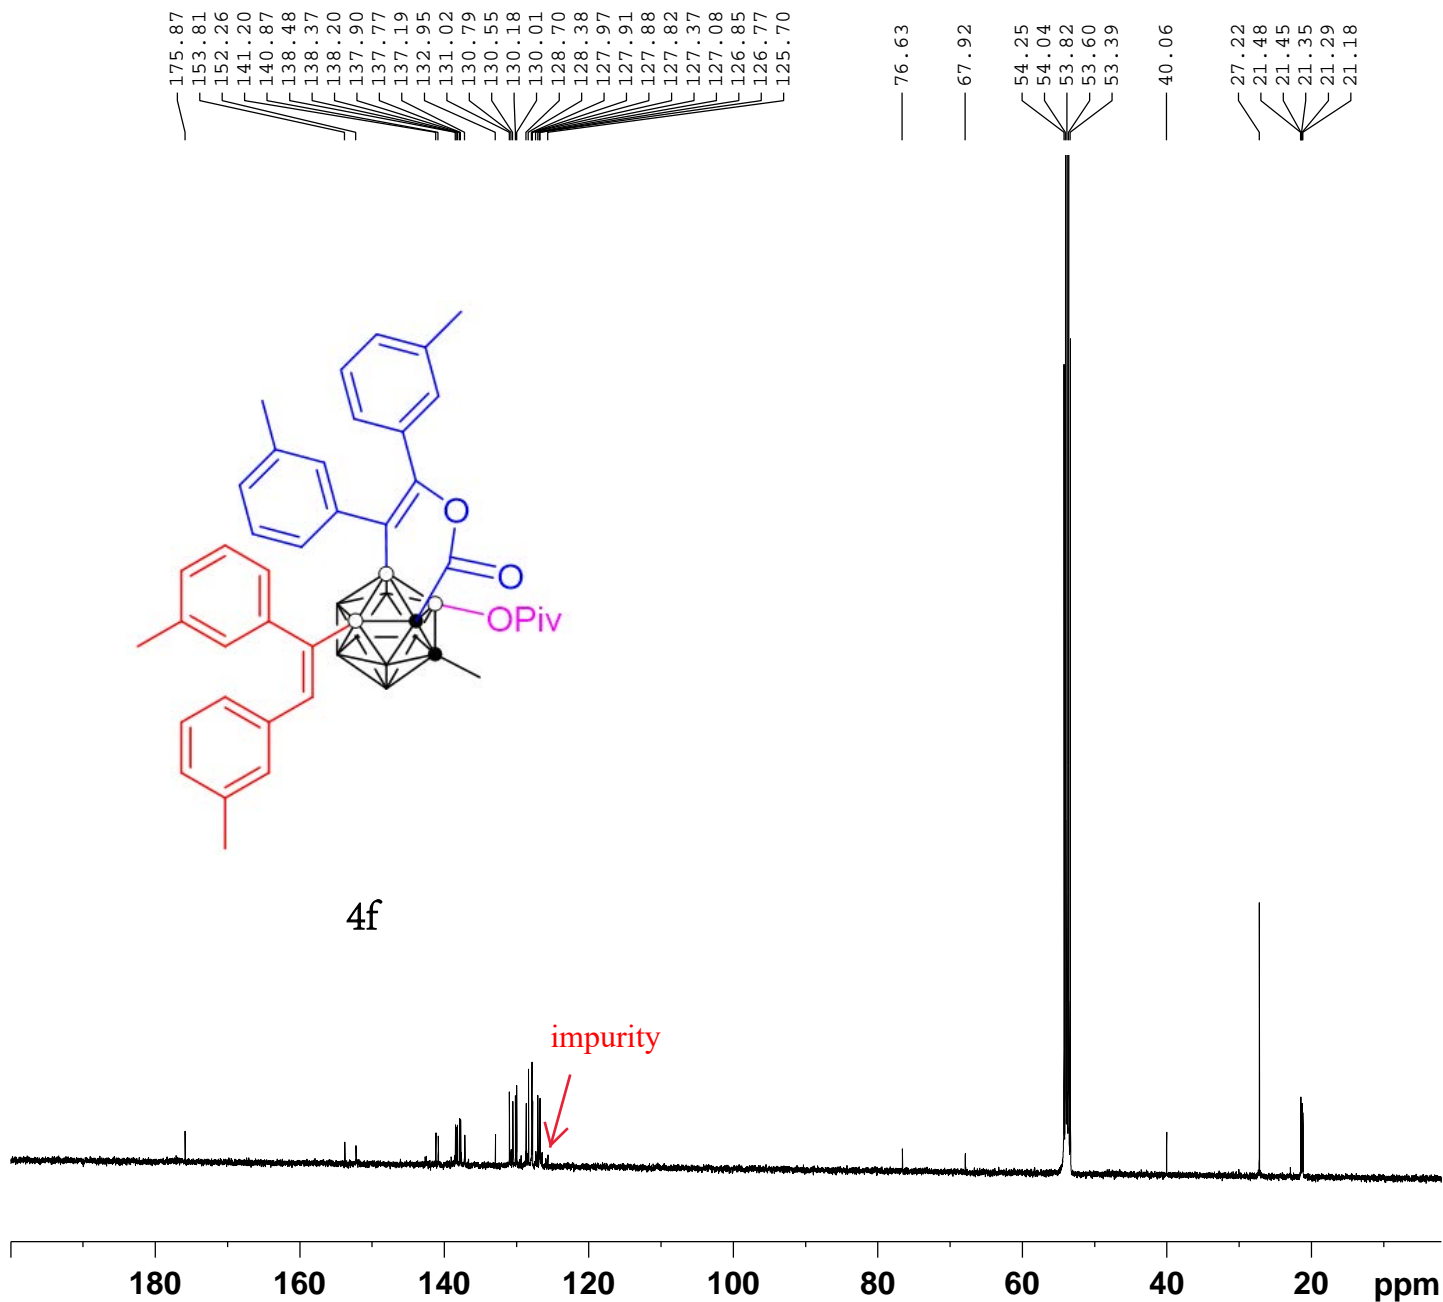

Current Data Parameters  
NAME CY-C-A-97P-Rh  
EXPNO 1  
PROCNO 1

F2 - Acquisition Parameters

Date\_ 20200630  
Time 0.22 h  
INSTRUM spect  
PROBHD Z119470\_0283 (  
PULPROG zgpg30  
TD 65536  
SOLVENT CD2Cl2  
NS 3200  
DS 4  
SWH 29761.904 Hz  
FIDRES 0.908261 Hz  
AQ 1.1010048 sec  
RG 206.72  
DW 16.800 usec  
DE 6.50 usec  
TE 295.1 K  
D1 2.0000000 sec  
D11 0.03000000 sec  
TD0 1  
SFO1 125.7703643 MHz  
NUC1 13C  
P1 9.75 usec  
PLW1 94.0000000 W  
SFO2 500.1320005 MHz  
NUC2 1H  
CPDPRG[2] waltz16  
PCPD2 80.00 usec  
PLW2 25.0000000 W  
PLW12 0.39063001 W  
PLW13 0.19648001 W

F2 - Processing parameters

SI 32768  
SF 125.7577417 MHz  
WDW EM  
SSB 0  
LB 1.00 Hz  
GB 0  
PC 1.40

# $^{11}\text{B}\{^1\text{H}\}$ NMR

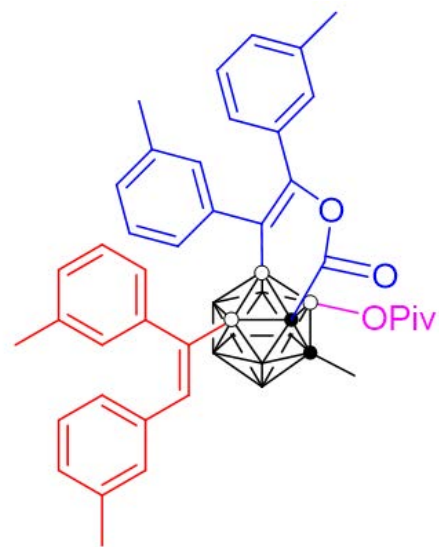

4f

— -3.38  
— -6.04  
— -13.64

CY-B-A-97Rh-1

Current Data Parameters  
NAME CY-B-A-97Rh-1  
EXPNO 1  
PROCNO 1

F2 - Acquisition Parameters  
Date\_ 20200610  
Time 18.39 h  
INSTRUM spect  
PROBHD Z108618\_0257 (  
PULPROG zgdc  
TD 65536  
SOLVENT CDCl3  
NS 35  
DS 4  
SWH 24038.461 Hz  
FIDRES 0.366798 Hz  
AQ 1.3631488 sec  
RG 406  
DW 20.800 usec  
DE 6.50 usec  
TE 294.9 K  
D1 2.00000000 sec  
D11 0.03000000 sec  
TD0 1  
SFO1 128.4096890 MHz  
NUC1  $^{11}\text{B}$   
P1 7.50 usec  
PLW1 55.09999847 W  
SFO2 400.2316009 MHz  
NUC2  $^1\text{H}$   
CPDPRG[2] waltz16  
PCPD2 90.00 usec  
PLW2 13.56000042 W  
PLW12 0.27428001 W

F2 - Processing parameters  
SI 32768  
SF 128.4097615 MHz  
WDW EM  
SSB 0  
LB 1.00 Hz  
GB 0  
PC 1.40

impurity

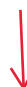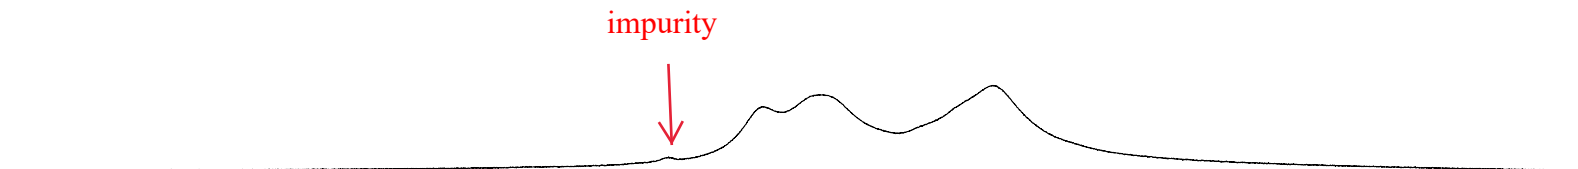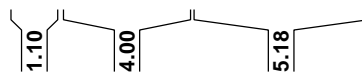

25 20 15 10 5 0 -5 -10 -15 -20 -25 -30 -35 ppm

# $^{11}\text{B}$ NMR

CY-B-A-97Rh-1-(C)

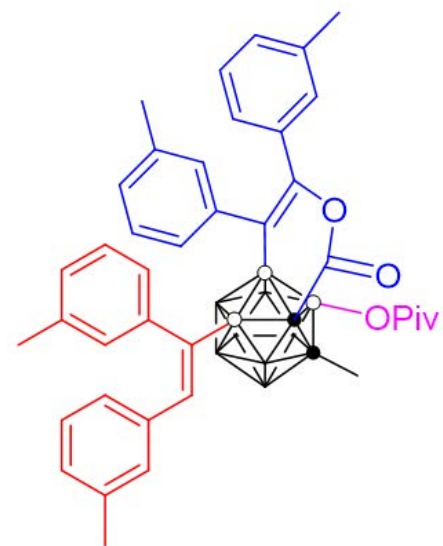

— -3.16  
— -5.80  
— -13.26

impurity

4f

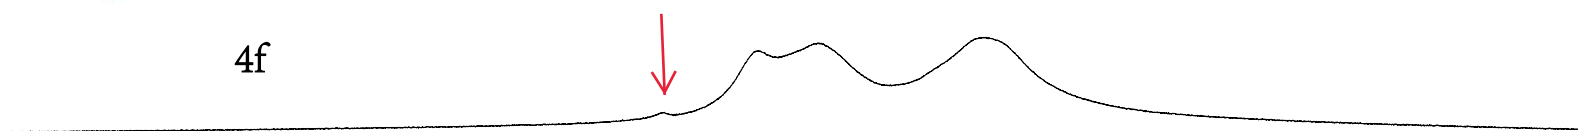

Current Data Parameters  
NAME CY-B-A-97Rh-1-(C)  
EXPNO 1  
PROCNO 1

F2 - Acquisition Parameters  
Date\_ 20200610  
Time 18.46 h  
INSTRUM spect  
PROBHD Z108618\_0257 (  
PULPROG zg  
TD 65536  
SOLVENT CDCl3  
NS 38  
DS 2  
SWH 24038.461 Hz  
FIDRES 0.366798 Hz  
AQ 1.3631488 sec  
RG 406  
DW 20.800 usec  
DE 6.50 usec  
TE 294.2 K  
D1 2.00000000 sec  
TD0 1  
SFO1 128.4096890 MHz  
NUC1 11B  
P1 7.50 usec  
PLW1 55.09999847 W

F2 - Processing parameters  
SI 32768  
SF 128.4097430 MHz  
WDW EM  
SSB 0  
LB 1.00 Hz  
GB 0  
PC 1.40

25 20 15 10 5 0 -5 -10 -15 -20 -25 -30 -35 ppm

7.261  
6.936  
6.777  
6.746  
6.730  
6.694  
6.660  
6.484  
6.444  
6.318

2.280  
2.197  
2.121  
2.081  
2.050  
1.565  
1.193  
1.183  
1.177

CY-H-A-98p-p

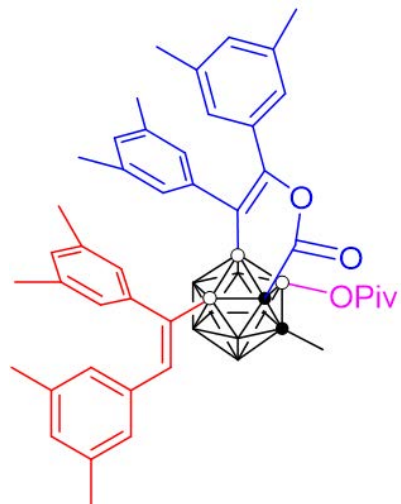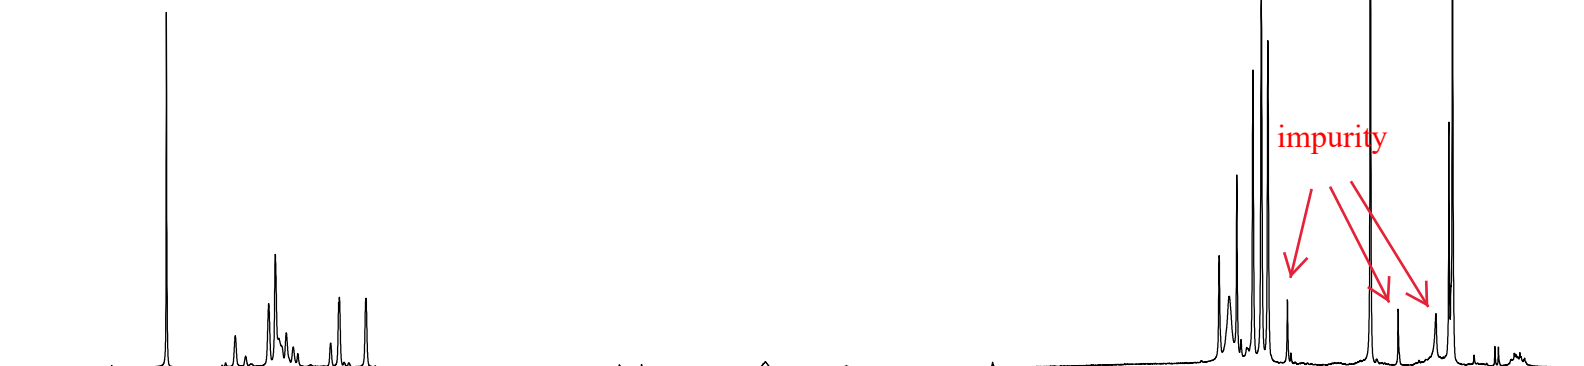

1.02  
2.07  
4.28  
2.05  
1.91  
1.87

2.48  
3.29  
3.00  
5.92  
6.48  
5.86

9.16

7.5 7.0 6.5 6.0 5.5 5.0 4.5 4.0 3.5 3.0 2.5 2.0 1.5 1.0 ppm

Current Data Parameters  
 NAME CY-H-A-98p-p  
 EXPNO 1  
 PROCNO 1  
 F2 - Acquisition Parameters  
 Date\_ 20170901  
 Time 15.09 h  
 INSTRUM spect  
 PROBHD Z108618\_0257 (  
 PULPROG zg30  
 TD 65536  
 SOLVENT CDCl3  
 NS 12  
 DS 2  
 SWH 8012.820 Hz  
 FIDRES 0.122266 Hz  
 AQ 4.0894465 sec  
 RG 181  
 DW 62.400 usec  
 DE 6.50 usec  
 TE 295.1 K  
 D1 1.00000000 sec  
 TD0 1  
 SFO1 400.2324714 MHz  
 NUC1 1H  
 P1 12.80 usec  
 PLW1 13.56000042 W

F2 - Processing parameters  
 SI 65536  
 SF 400.2300100 MHz  
 WDW EM  
 SSB 0  
 LB 0.30 Hz  
 GB 0  
 PC 1.00

CY-C-A-98Rh

177.34  
 155.52  
 153.60  
 142.69  
 141.83  
 139.75  
 139.69  
 139.34  
 138.93  
 138.57  
 134.29  
 132.28  
 130.76  
 130.07  
 129.57  
 129.43  
 129.22  
 128.92  
 128.89  
 128.57

77.96  
 69.49  
 55.74  
 55.52  
 55.31  
 55.09  
 54.88  
 41.54  
 31.56  
 28.74  
 22.85  
 22.76  
 22.70  
 22.68

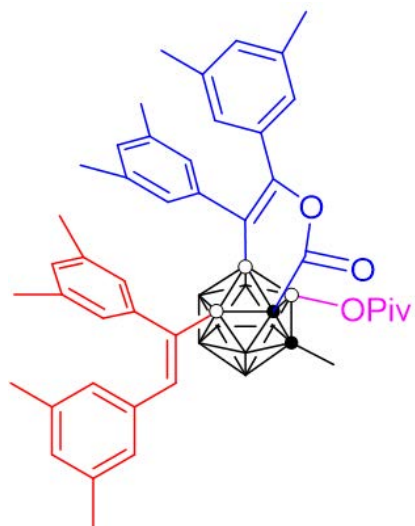

4g

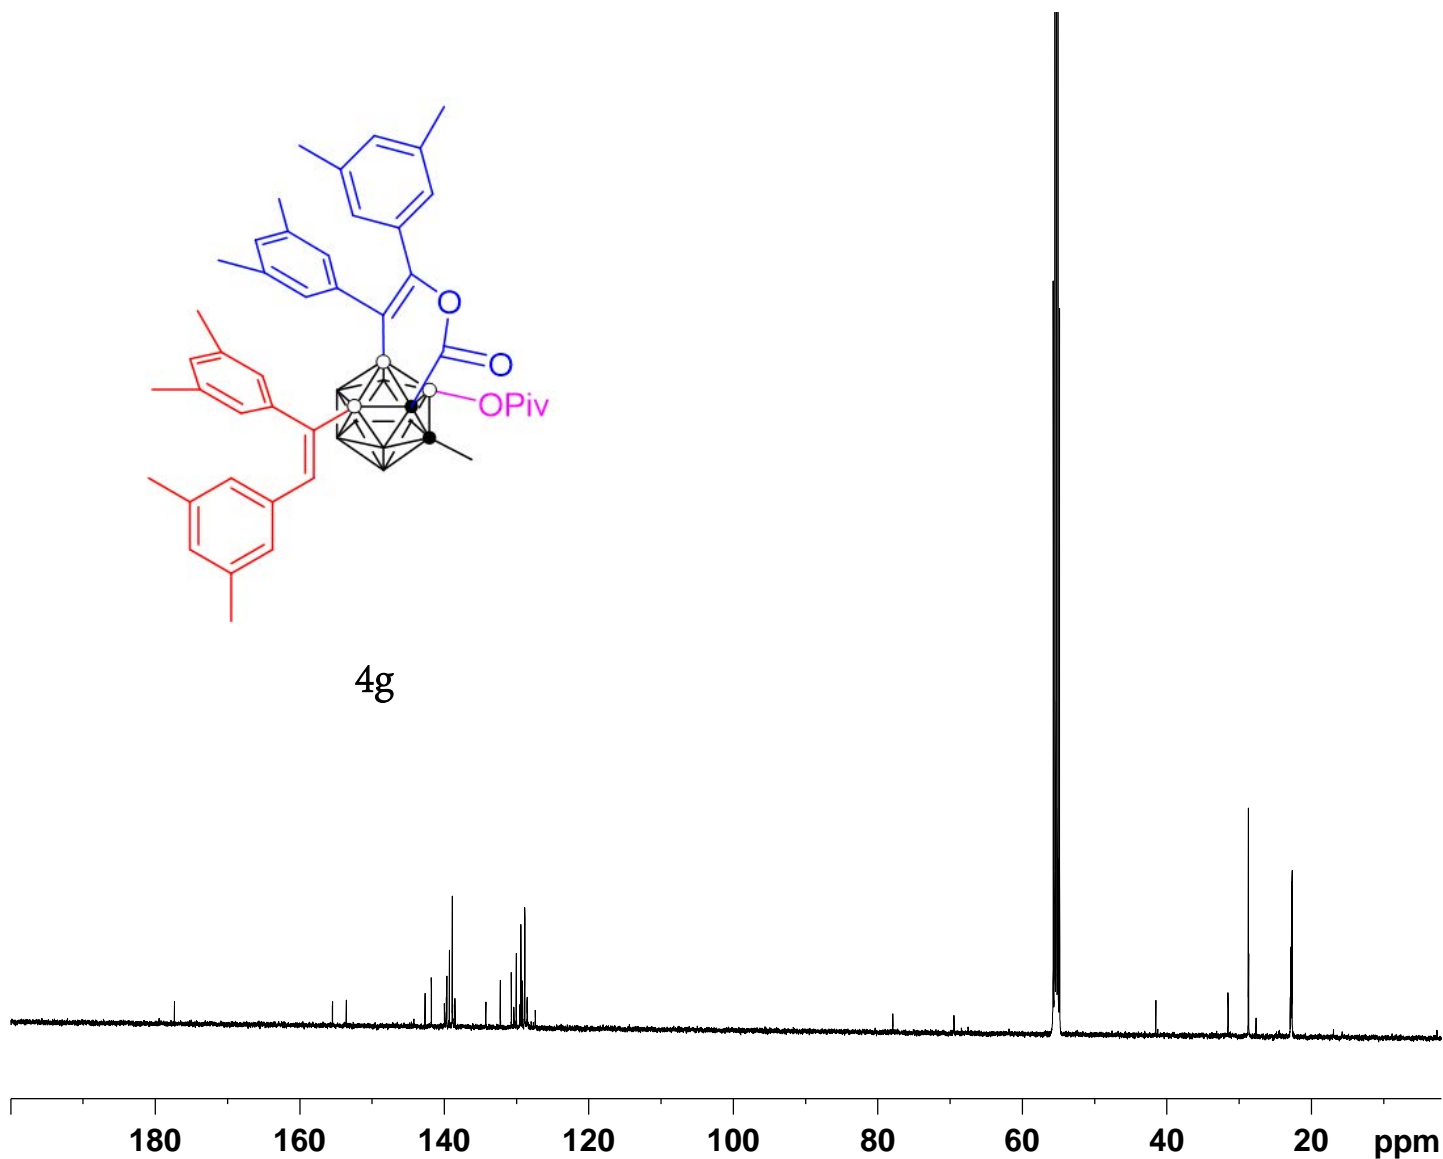

Current Data Parameters  
 NAME CY-C-A-98Rh  
 EXPNO 1  
 PROCNO 1

F2 - Acquisition Parameters

Date\_ 20200616  
 Time 3.54 h  
 INSTRUM spect  
 PROBHD Z119470\_0283 (  
 PULPROG zgpg30  
 TD 65536  
 SOLVENT CD2Cl2  
 NS 5000  
 DS 4  
 SWH 29761.904 Hz  
 FIDRES 0.908261 Hz  
 AQ 1.1010048 sec  
 RG 206.72  
 DW 16.800 usec  
 DE 6.50 usec  
 TE 295.2 K  
 D1 2.0000000 sec  
 D11 0.03000000 sec  
 TD0 1  
 SFO1 125.7703643 MHz  
 NUC1 13C  
 P1 9.75 usec  
 PLW1 94.0000000 W  
 SFO2 500.1320005 MHz  
 NUC2 1H  
 CPDPRG[2] waltz16  
 PCPD2 80.00 usec  
 PLW2 25.0000000 W  
 PLW12 0.39063001 W  
 PLW13 0.19648001 W

F2 - Processing parameters

SI 32768  
 SF 125.7575539 MHz  
 WDW EM  
 SSB 0  
 LB 1.00 Hz  
 GB 0  
 PC 1.40

# $^{11}\text{B}\{^1\text{H}\}$ NMR

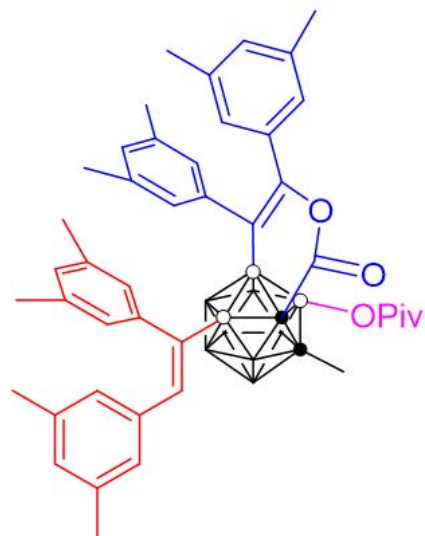

4g

— -3.37  
— -5.62  
— -13.38

CY-B-A-98Rh-1

Current Data Parameters  
NAME CY-B-A-98Rh-1  
EXPNO 1  
PROCNO 1

F2 - Acquisition Parameters  
Date\_ 20200610  
Time 18.47 h  
INSTRUM spect  
PROBHD Z108618\_0257 (  
PULPROG zgdc  
TD 65536  
SOLVENT CDCl3  
NS 16  
DS 4  
SWH 24038.461 Hz  
FIDRES 0.366798 Hz  
AQ 1.3631488 sec  
RG 406  
DW 20.800 usec  
DE 6.50 usec  
TE 294.7 K  
D1 2.00000000 sec  
D11 0.03000000 sec  
TD0 1  
SFO1 128.4096890 MHz  
NUC1  $^{11}\text{B}$   
P1 7.50 usec  
PLW1 55.09999847 W  
SFO2 400.2316009 MHz  
NUC2  $^1\text{H}$   
CPDPRG[2] waltz16  
PCPD2 90.00 usec  
PLW2 13.56000042 W  
PLW12 0.27428001 W

F2 - Processing parameters  
SI 32768  
SF 128.4097615 MHz  
WDW EM  
SSB 0  
LB 1.00 Hz  
GB 0  
PC 1.40

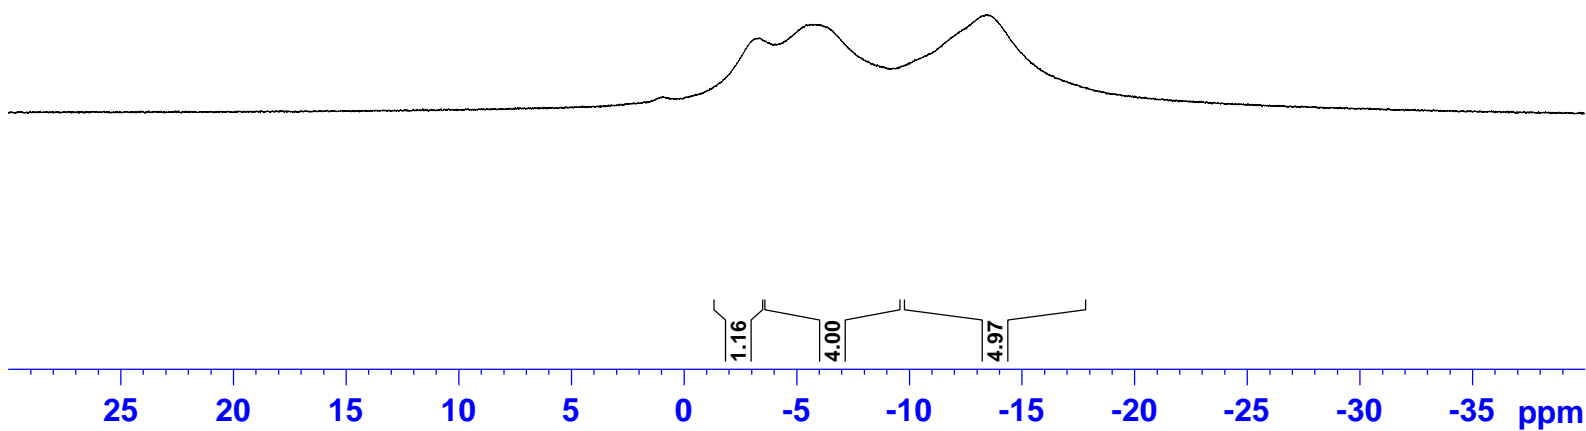

# $^{11}\text{B}$ NMR

CY-B-A-98Rh-1-(C)

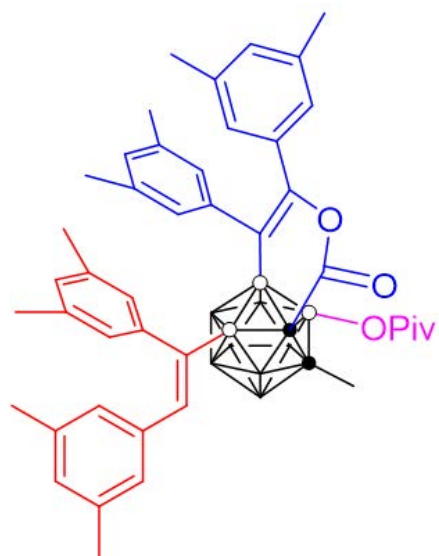

4g

--- -3.00  
--- -5.76  
--- -12.93

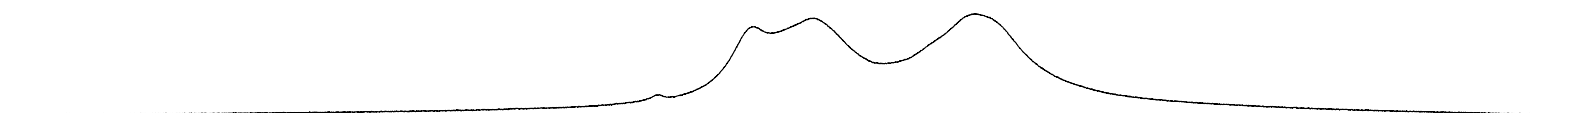

Current Data Parameters  
NAME CY-B-A-98Rh-1-(C)  
EXPNO 1  
PROCNO 1

F2 - Acquisition Parameters  
Date\_ 20200610  
Time 18.53 h  
INSTRUM spect  
PROBHD Z108618\_0257 (  
PULPROG zg  
TD 65536  
SOLVENT CDCl3  
NS 59  
DS 2  
SWH 24038.461 Hz  
FIDRES 0.366798 Hz  
AQ 1.3631488 sec  
RG 406  
DW 20.800 usec  
DE 6.50 usec  
TE 294.1 K  
D1 2.00000000 sec  
TD0 1  
SF01 128.4096890 MHz  
NUC1 11B  
P1 7.50 usec  
PLW1 55.09999847 W

F2 - Processing parameters  
SI 32768  
SF 128.4097430 MHz  
WDW EM  
SSB 0  
LB 1.00 Hz  
GB 0  
PC 1.40

25 20 15 10 5 0 -5 -10 -15 -20 -25 -30 -35 ppm

7.085  
7.064  
7.044  
7.024  
6.997  
6.977  
6.957  
6.835  
6.808  
6.744  
6.729  
6.712  
6.684  
6.656  
6.625  
6.620  
6.605  
6.600  
6.572  
6.553  
6.505  
6.486  
6.352

3.705  
3.621  
3.474  
3.435

2.171

1.590

1.241  
1.150

CY-H-A-106Rh

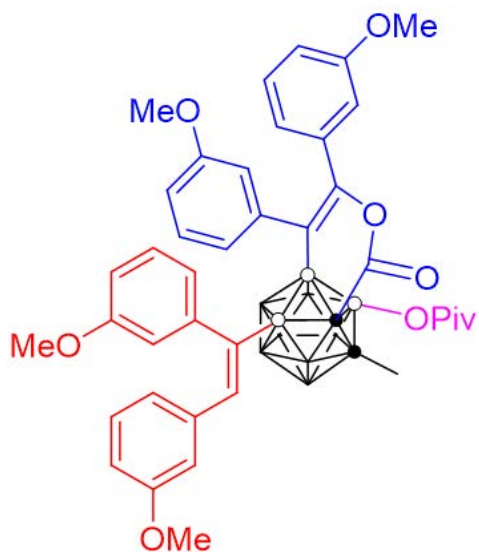

4h

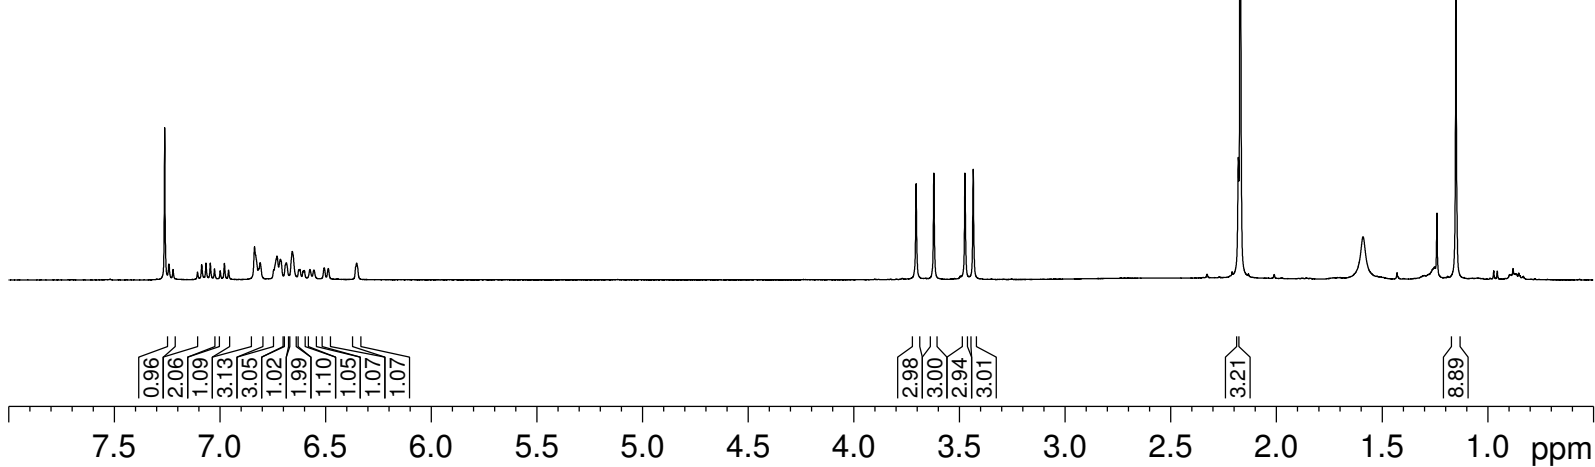

0.96  
2.06  
1.09  
3.13  
3.05  
1.02  
1.99  
1.10  
1.05  
1.07  
1.07

2.98  
3.00  
2.94  
3.01

3.21

8.89

Current Data Parameters  
 NAME CY-H-A-106Rh  
 EXPNO 1  
 PROCNO 1  
 F2 - Acquisition Parameters  
 Date\_ 20170721  
 Time 15.48 h  
 INSTRUM spect  
 PROBHD Z108618\_0257 (  
 PULPROG zg30  
 TD 65536  
 SOLVENT CDCl3  
 NS 18  
 DS 2  
 SWH 8012.820 Hz  
 FIDRES 0.122266 Hz  
 AQ 4.0894465 sec  
 RG 144  
 DW 62.400 usec  
 DE 6.50 usec  
 TE 295.0 K  
 D1 1.0000000 sec  
 TD0 1  
 SFO1 400.2324714 MHz  
 NUC1 1H  
 P1 12.80 usec  
 PLW1 13.56000042 W

F2 - Processing parameters  
 SI 65536  
 SF 400.2300103 MHz  
 WDW EM  
 SSB 0  
 LB 0.30 Hz  
 GB 0  
 PC 1.00



CY-C-A-106Rh

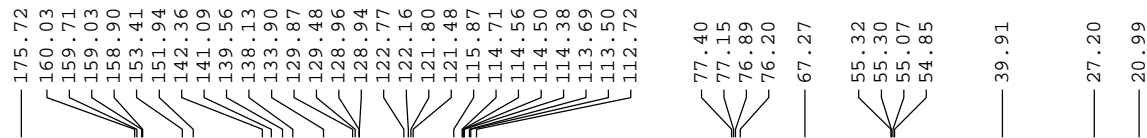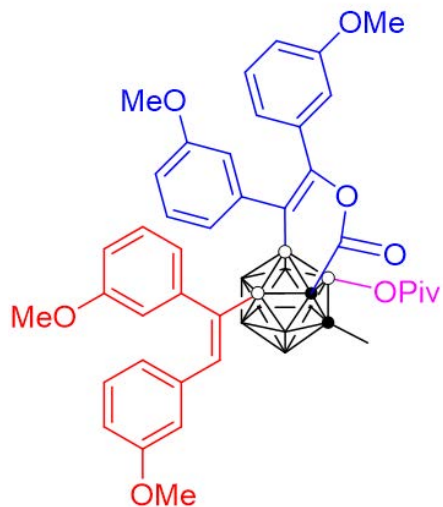

4h

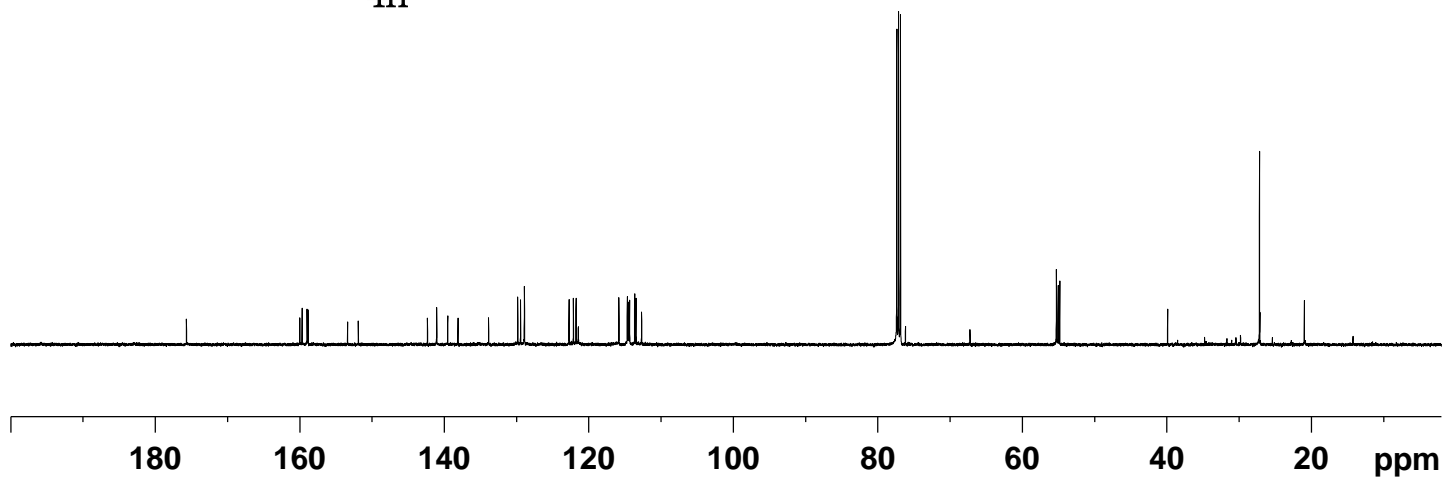

Current Data Parameters  
NAME CY-C-A-106Rh  
EXPNO 1  
PROCNO 1

F2 - Acquisition Parameters

Date\_ 20170722  
Time 14.22 h  
INSTRUM spect  
PROBHD Z119470\_0283 (  
PULPROG zgpg30  
TD 65536  
SOLVENT CDCl3  
NS 756  
DS 4  
SWH 29761.904 Hz  
FIDRES 0.908261 Hz  
AQ 1.1010048 sec  
RG 206.72  
DW 16.800 usec  
DE 6.50 usec  
TE 297.9 K  
D1 2.0000000 sec  
D11 0.0300000 sec  
TD0 1  
SFO1 125.7703643 MHz  
NUC1 13C  
P1 10.00 usec  
PLW1 94.0000000 W  
SFO2 500.1320005 MHz  
NUC2 1H  
CPDPRG[2] waltz16  
PCPD2 80.00 usec  
PLW2 25.0000000 W  
PLW12 0.39063001 W  
PLW13 0.19648001 W

F2 - Processing parameters

SI 32768  
SF 125.7577748 MHz  
WDW EM  
SSB 0  
LB 1.00 Hz  
GB 0  
PC 1.40

# $^{11}\text{B}\{^1\text{H}\}$ NMR

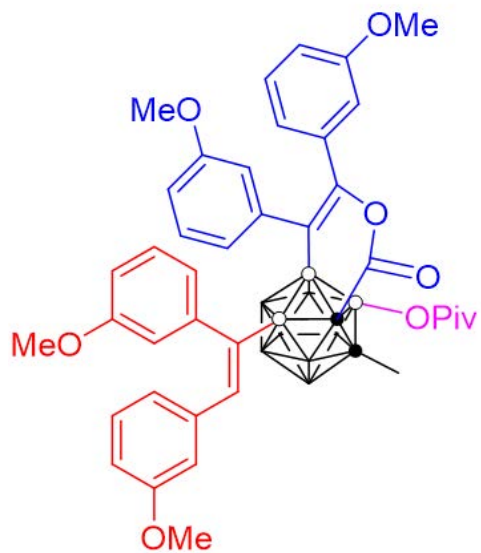

4h

— -3.55  
— -5.84  
— -14.02

CY-B-A-106Rh

Current Data Parameters  
NAME CY-B-A-106Rh  
EXPNO 1  
PROCNO 1

F2 - Acquisition Parameters  
Date\_ 20170722  
Time 16.16 h  
INSTRUM spect  
PROBHD Z108618\_0257 (  
PULPROG zgdc  
TD 65536  
SOLVENT CDCl3  
NS 48  
DS 4  
SWH 24038.461 Hz  
FIDRES 0.366798 Hz  
AQ 1.3631488 sec  
RG 322  
DW 20.800 usec  
DE 6.50 usec  
TE 295.6 K  
D1 2.00000000 sec  
D11 0.03000000 sec  
TD0 1  
SFO1 128.4096890 MHz  
NUC1  $^{11}\text{B}$   
P1 7.50 usec  
PLW1 55.09999847 W  
SFO2 400.2316009 MHz  
NUC2  $^1\text{H}$   
CPDPRG[2] waltz16  
PCPD2 90.00 usec  
PLW2 13.56000042 W  
PLW12 0.27428001 W

F2 - Processing parameters  
SI 32768  
SF 128.4097615 MHz  
WDW EM  
SSB 0  
LB 1.00 Hz  
GB 0  
PC 1.40

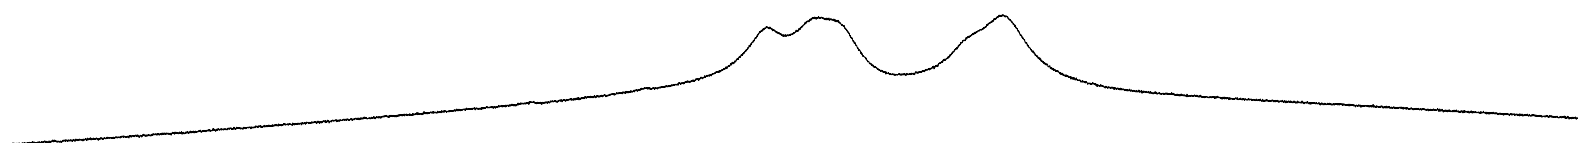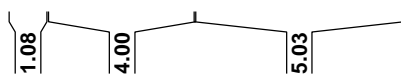

25 20 15 10 5 0 -5 -10 -15 -20 -25 -30 -35 ppm

# $^{11}\text{B}$ NMR

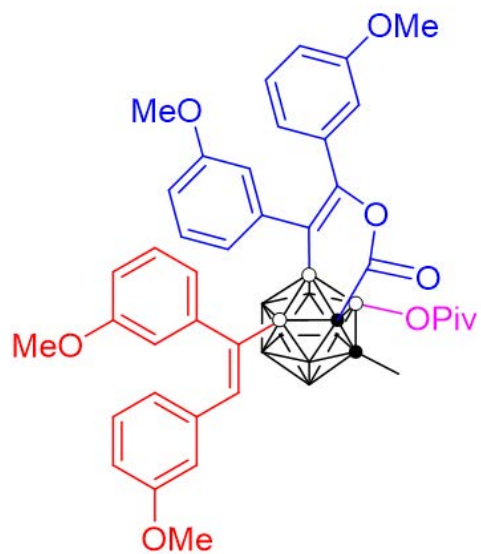

— -3.44  
— -5.99  
— -13.47

CY-B-A-106Rh-(C)

Current Data Parameters  
NAME CY-B-A-106Rh-(C)  
EXPNO 1  
PROCNO 1

F2 - Acquisition Parameters  
Date\_ 20170722  
Time 14.25 h  
INSTRUM spect  
PROBHD Z119470\_0283 (  
PULPROG zg  
TD 32768  
SOLVENT None  
NS 2  
DS 4  
SWH 24038.461 Hz  
FIDRES 1.467191 Hz  
AQ 0.6815744 sec  
RG 206.72  
DW 20.800 usec  
DE 6.50 usec  
TE 297.8 K  
D1 1.00000000 sec  
TD0 1  
SFO1 160.4615792 MHz  
NUC1  $^{11}\text{B}$   
P1 16.00 usec  
PLW1 50.00000000 W

F2 - Processing parameters  
SI 16384  
SF 160.4615792 MHz  
WDW EM  
SSB 0  
LB 1.00 Hz  
GB 0  
PC 1.40

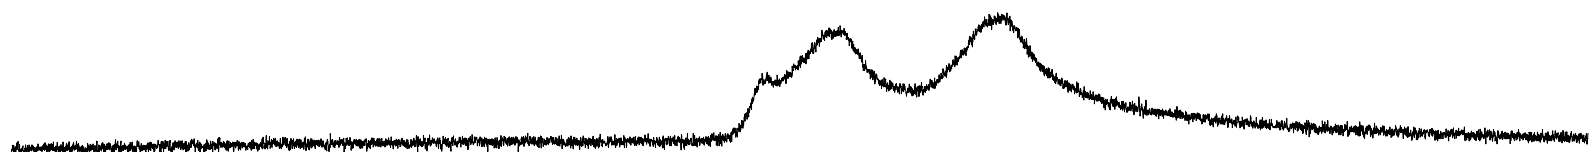

25 20 15 10 5 0 -5 -10 -15 -20 -25 -30 -35 ppm

CB5058-H

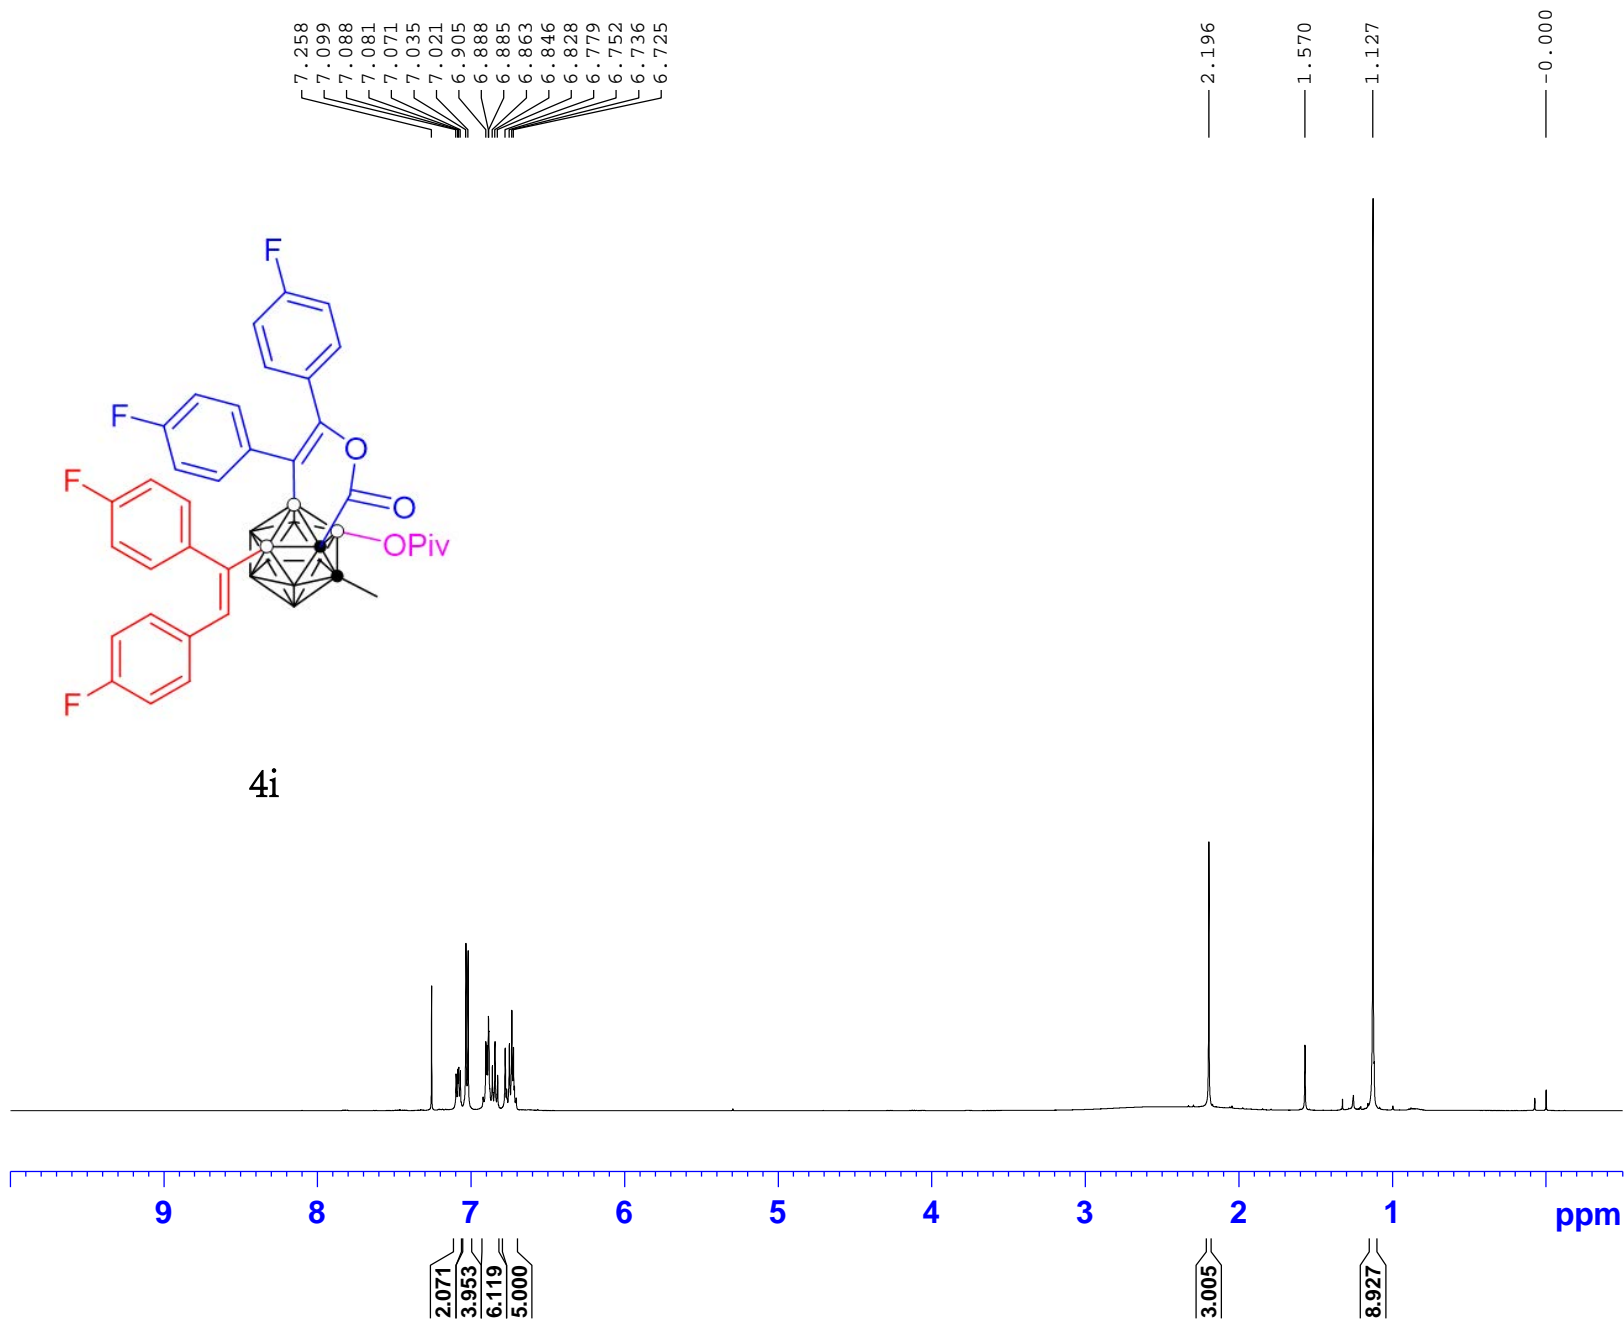

Current Data Parameters  
NAME CB5058-H  
EXPNO 1  
PROCNO 1

F2 - Acquisition Parameters  
Date\_ 20210124  
Time 1.34 h  
INSTRUM spect  
PROBHD Z119470\_0283 (  
PULPROG zg30  
TD 65536  
SOLVENT CDCl3  
NS 16  
DS 2  
SWH 10000.000 Hz  
FIDRES 0.305176 Hz  
AQ 3.2767999 sec  
RG 56.83  
DW 50.000 usec  
DE 6.50 usec  
TE 295.2 K  
D1 1.00000000 sec  
TD0 1  
SF01 500.1330883 MHz  
NUC1 1H  
P1 10.91 usec  
PLW1 25.00000000 W

F2 - Processing parameters  
SI 65536  
SF 500.1300132 MHz  
WDW EM  
SSB 0  
LB 0.30 Hz  
GB 0  
PC 1.00

175.537  
 163.692  
 162.993  
 162.884  
 162.766  
 161.692  
 161.029  
 160.918  
 160.786  
 153.019  
 150.902  
 140.264  
 136.146  
 136.119  
 133.577  
 133.551  
 132.594  
 132.569  
 131.316  
 131.248  
 131.231  
 131.169  
 131.107  
 130.679  
 130.626  
 128.332  
 128.305  
 115.899  
 115.751  
 115.731  
 115.581  
 115.319  
 115.146  
 115.081  
 114.912

77.253  
 76.998  
 76.744  
 76.070  
 67.224

39.776

26.990

20.789

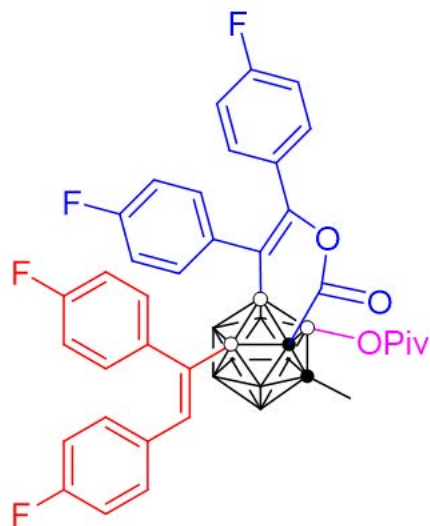

4i

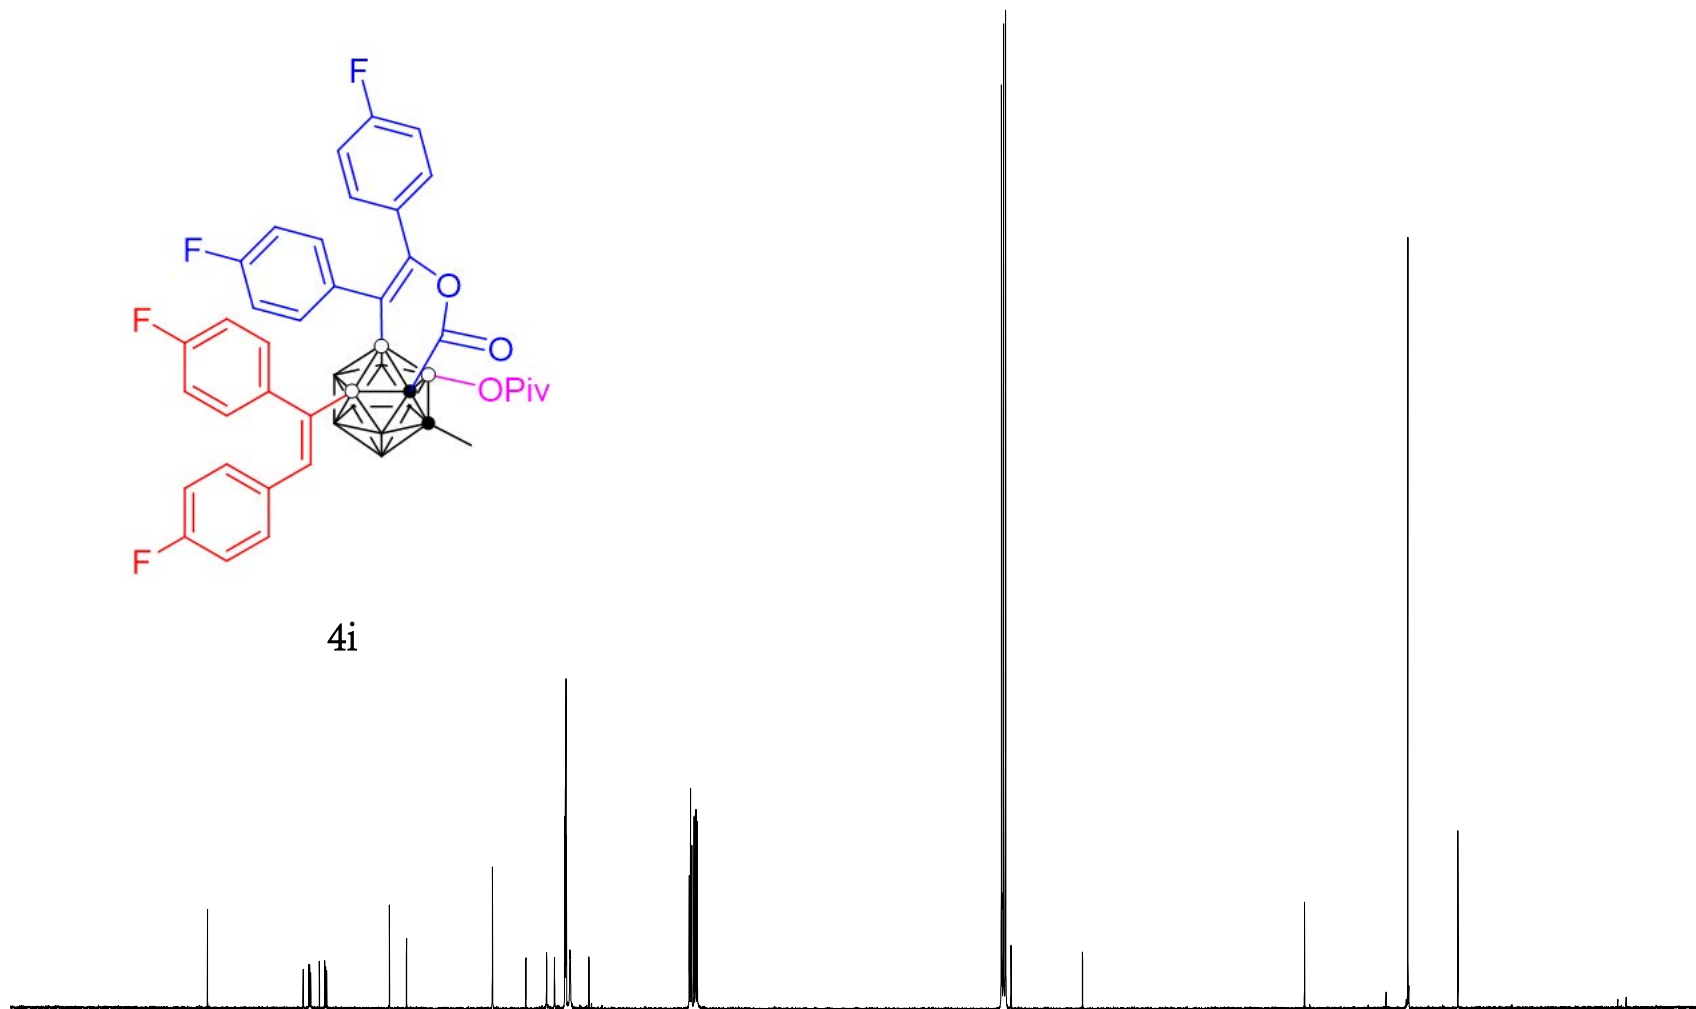

Current Data Parameters  
 NAME CB5058-C  
 EXPNO 1  
 PROCNO 1

F2 - Acquisition Parameters  
 Date\_ 20210124  
 Time 5.15 h  
 INSTRUM spect  
 PROBHD Z119470\_0283 ( )  
 PULPROG zgpg30  
 TD 65536  
 SOLVENT CDC13  
 NS 4096  
 DS 4  
 SWH 29761.904 Hz  
 FIDRES 0.908261 Hz  
 AQ 1.1010048 sec  
 RG 206.72  
 DW 16.800 usec  
 DE 6.50 usec  
 TE 295.1 K  
 D1 2.0000000 sec  
 D11 0.0300000 sec  
 TD0 1  
 SFO1 125.7703643 MHz  
 NUC1 13C  
 P1 9.75 usec  
 PLW1 94.0000000 W  
 SFO2 500.1320005 MHz  
 NUC2 1H  
 CPDPRG[2] waltz16  
 PCPD2 80.00 usec  
 PLW2 25.0000000 W  
 PLW12 0.46495000 W  
 PLW13 0.23387000 W

F2 - Processing parameters  
 SI 32768  
 SF 125.7577936 MHz  
 WDW EM  
 SSB 0  
 LB 1.00 Hz  
 GB 0  
 PC 1.40

190 180 170 160 150 140 130 120 110 100 90 80 70 60 50 40 30 20 10 ppm

# $^{11}\text{B}\{^1\text{H}\}$ NMR

CB5058-B-dc

Current Data Parameters  
NAME CB5058-B-dc  
EXPNO 1  
PROCNO 1

F2 - Acquisition Parameters  
Date\_ 20210124  
Time 1.36 h  
INSTRUM spect  
PROBHD Z119470\_0283 (  
PULPROG zgpg30  
TD 32768  
SOLVENT CDCl3  
NS 32  
DS 4  
SWH 24038.461 Hz  
FIDRES 1.467191 Hz  
AQ 0.6815744 sec  
RG 206.72  
DW 20.800 usec  
DE 6.50 usec  
TE 295.1 K  
D1 1.00000000 sec  
D11 0.03000000 sec  
TD0 1  
SFO1 160.4615790 MHz  
NUC1 11B  
P1 16.00 usec  
PLW1 50.00000000 W  
SFO2 500.1320005 MHz  
NUC2 1H  
CPDPRG[2] waltz16  
PCPD2 80.00 usec  
PLW2 25.00000000 W  
PLW12 0.46495000 W  
PLW13 0.23387000 W

F2 - Processing parameters  
SI 16384  
SF 160.4615999 MHz  
WDW EM  
SSB 0  
LB 1.00 Hz  
GB 0  
PC 1.40

— -3.53  
— -5.35  
— -6.94  
— -13.87

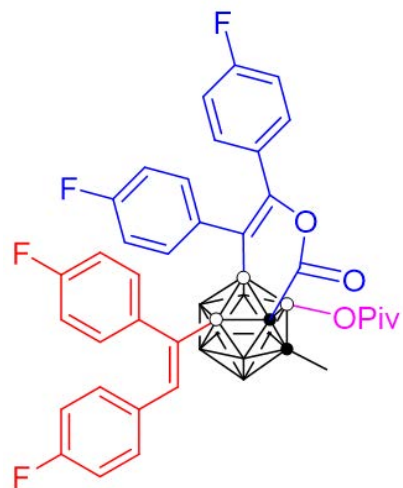

4i

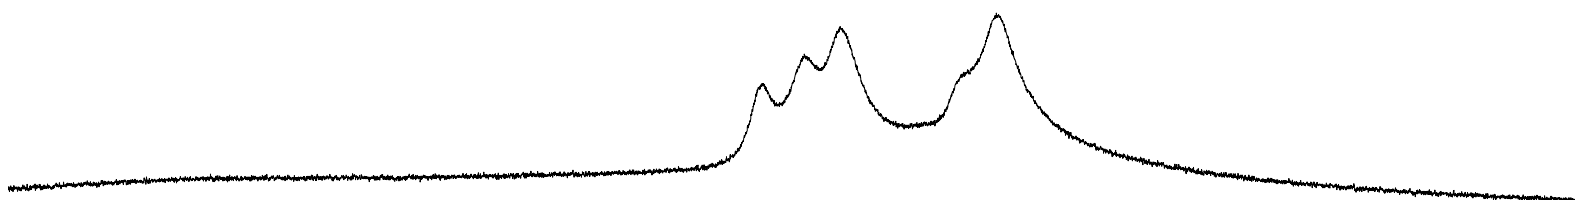

1.06  
1.94  
2.16  
5.00

25 20 15 10 5 0 -5 -10 -15 -20 -25 -30 -35 ppm

# $^{11}\text{B}$ NMR

CB5058-B-c

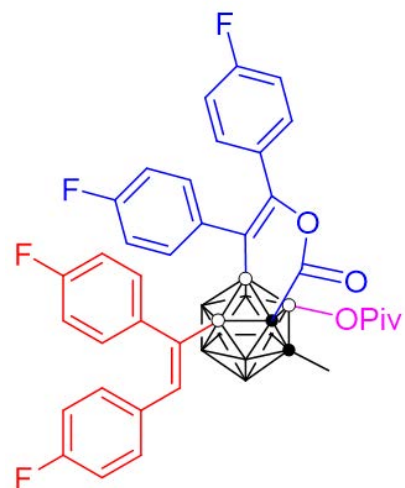

4i

— -3.32  
— -7.03  
— -13.39

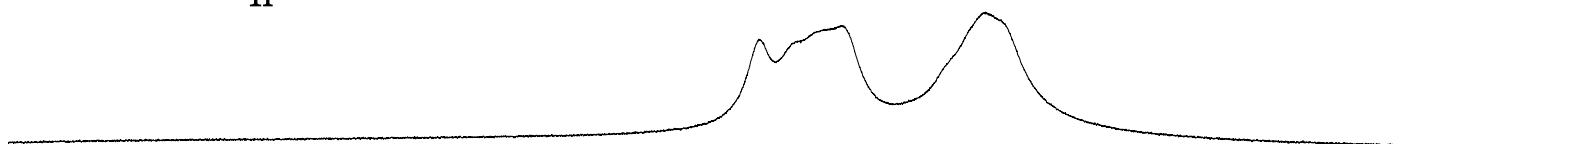

Current Data Parameters  
NAME CB5058-B-c  
EXPNO 1  
PROCNO 1

F2 - Acquisition Parameters  
Date\_ 20210124  
Time 1.38 h  
INSTRUM spect  
PROBHD Z119470\_0283 (  
PULPROG zg  
TD 32768  
SOLVENT CDCl3  
NS 64  
DS 4  
SWH 24038.461 Hz  
FIDRES 1.467191 Hz  
AQ 0.6815744 sec  
RG 206.72  
DW 20.800 usec  
DE 6.50 usec  
TE 295.1 K  
D1 1.00000000 sec  
TD0 1  
SF01 160.4615792 MHz  
NUC1 11B  
P1 16.00 usec  
PLW1 50.00000000 W

F2 - Processing parameters  
SI 16384  
SF 160.4615997 MHz  
WDW EM  
SSB 0  
LB 1.00 Hz  
GB 0  
PC 1.40

25 20 15 10 5 0 -5 -10 -15 -20 -25 -30 -35 ppm

CB5097-p-H

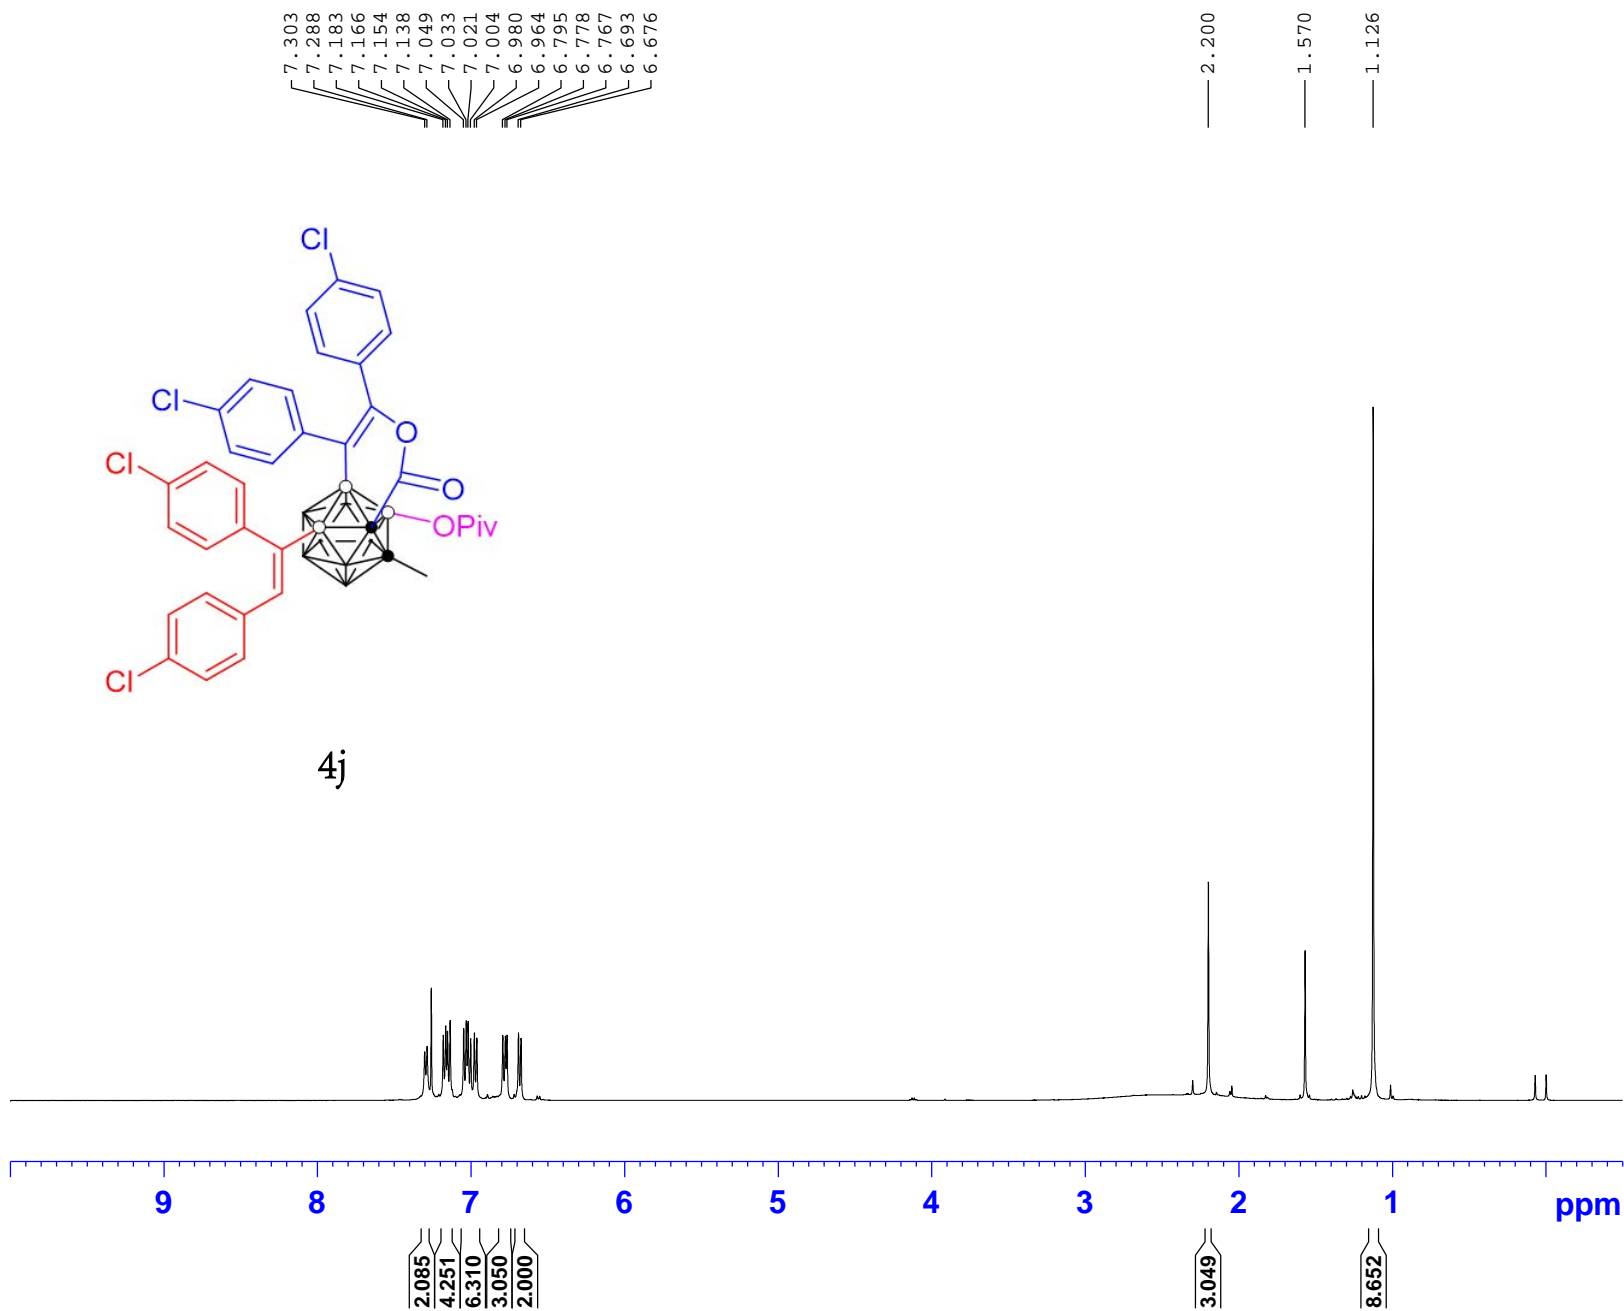

Current Data Parameters  
NAME CB5097-p-H  
EXPNO 4  
PROCNO 1

F2 - Acquisition Parameters  
Date\_ 20210307  
Time 10.33 h  
INSTRUM spect  
PROBHD Z119470\_0283 (  
PULPROG zg30  
TD 65536  
SOLVENT CDC13  
NS 16  
DS 2  
SWH 10000.000 Hz  
FIDRES 0.305176 Hz  
AQ 3.2767999 sec  
RG 93.28  
DW 50.000 usec  
DE 6.50 usec  
TE 295.1 K  
D1 1.00000000 sec  
TD0 1  
SF01 500.1330883 MHz  
NUC1 1H  
P1 10.91 usec  
PLW1 25.00000000 W

F2 - Processing parameters  
SI 65536  
SF 500.1300114 MHz  
WDW EM  
SSB 0  
LB 0.30 Hz  
GB 0  
PC 1.00



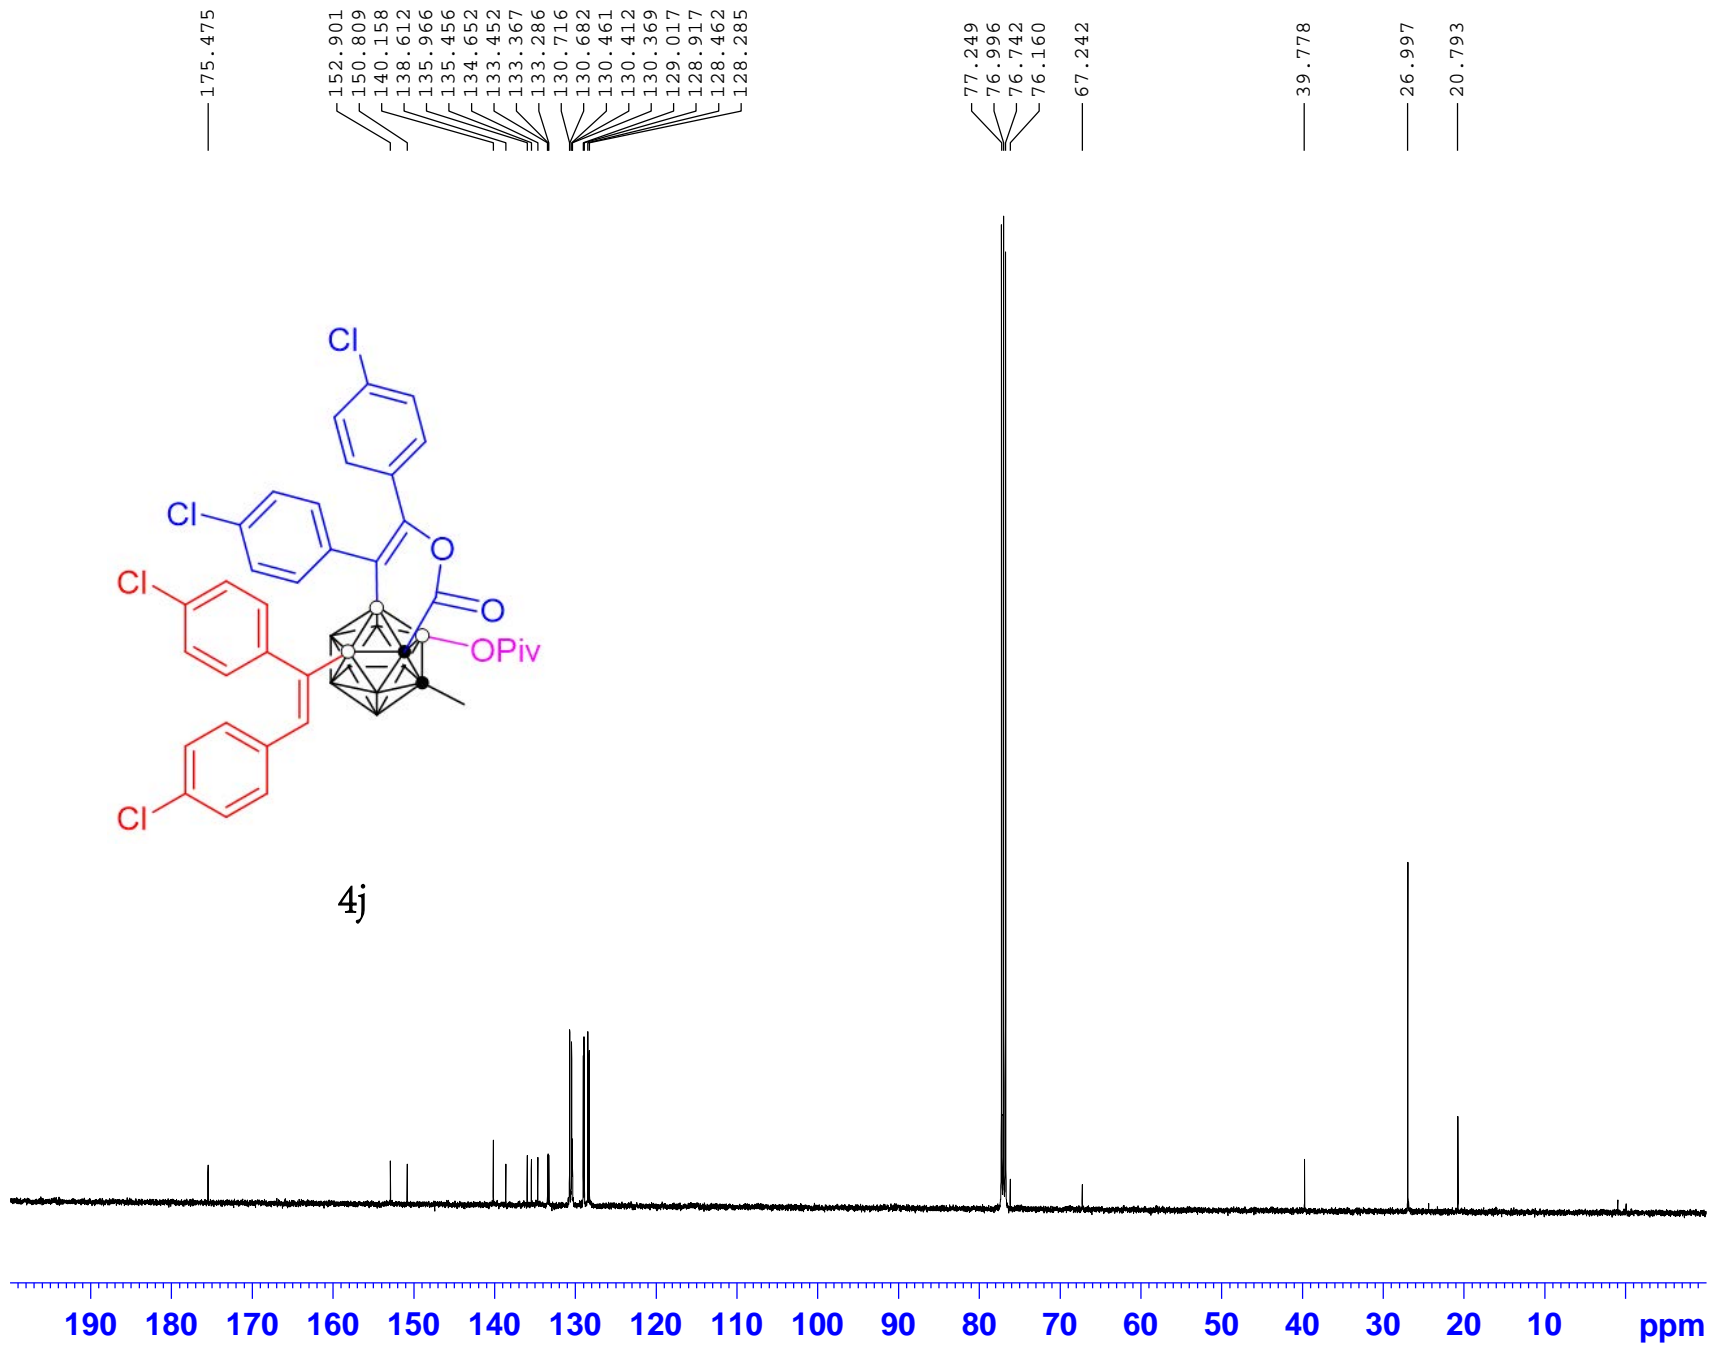

```

Current Data Parameters
NAME      CB5097-p-C
EXPNO    6
PROCNO   1

F2 - Acquisition Parameters
Date_    20210307
Time     10.29 h
INSTRUM  spect
PROBHD   Z119470_0283 (
PULPROG  zgpg30
TD       65536
SOLVENT  CDCl3
NS       1024
DS       4
SWH      29761.904 Hz
FIDRES   0.908261 Hz
AQ       1.1010048 sec
RG       117.01
DW       16.800 usec
DE       6.50 usec
TE       295.1 K
D1       2.0000000 sec
D11      0.0300000 sec
TD0      1
SF01     125.7703643 MHz
NUC1     13C
P1       9.75 usec
PLW1     94.0000000 W
SFO2     500.1320005 MHz
NUC2     1H
CPDPRG[2] waltz16
PCPD2    80.00 usec
PLW2     25.0000000 W
PLW12    0.46495000 W
PLW13    0.23387000 W

F2 - Processing parameters
SI       32768
SF       125.7577936 MHz
WDW      EM
SSB      0
LB       1.00 Hz
GB       0
PC       1.40

```

# $^{11}\text{B}\{^1\text{H}\}$ NMR

CB5097-p-B-dc

— -3.42  
— -5.35  
— -7.07  
— -13.89

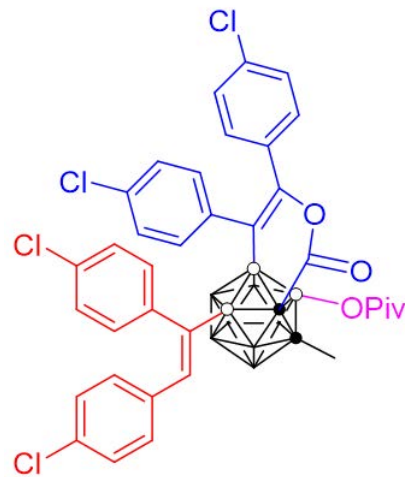

4j

Current Data Parameters  
NAME CB5097-p-B-dc  
EXPNO 5  
PROCNO 1

F2 - Acquisition Parameters  
Date\_ 20210307  
Time 10.36 h  
INSTRUM spect  
PROBHD Z119470\_0283 (  
PULPROG zgpg30  
TD 32768  
SOLVENT CDCl3  
NS 32  
DS 4  
SWH 24038.461 Hz  
FIDRES 1.467191 Hz  
AQ 0.6815744 sec  
RG 206.72  
DW 20.800 usec  
DE 6.50 usec  
TE 295.1 K  
D1 1.00000000 sec  
D11 0.03000000 sec  
TD0 1  
SFO1 160.4615790 MHz  
NUC1 11B  
P1 16.00 usec  
PLW1 50.00000000 W  
SFO2 500.1320005 MHz  
NUC2 1H  
CPDPRG[2] waltz16  
PCPD2 80.00 usec  
PLW2 25.00000000 W  
PLW12 0.46495000 W  
PLW13 0.23387000 W

F2 - Processing parameters  
SI 16384  
SF 160.4615999 MHz  
WDW EM  
SSB 0  
LB 1.00 Hz  
GB 0  
PC 1.40

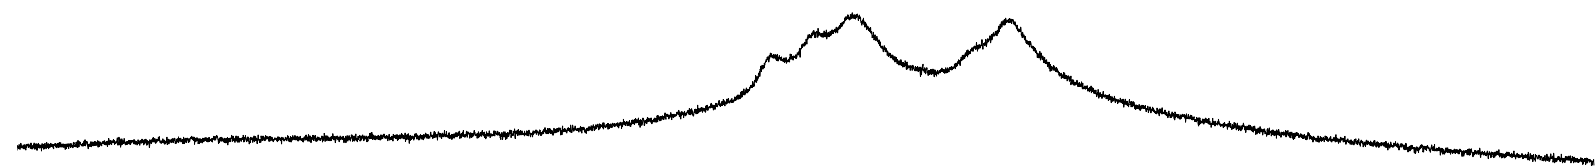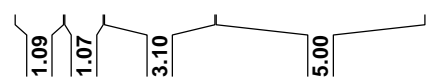

25 20 15 10 5 0 -5 -10 -15 -20 -25 -30 -35 ppm

# <sup>11</sup>B NMR

CB5097-p-B-c

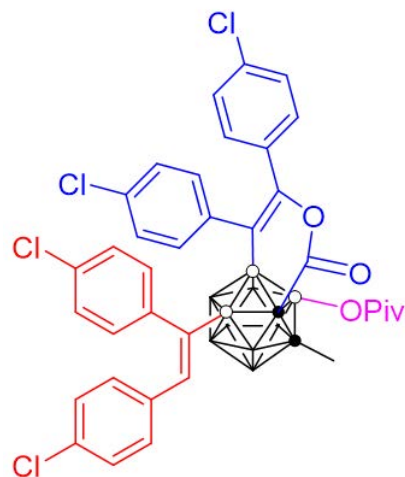

— -3.49  
— -7.29  
— -13.45

4j

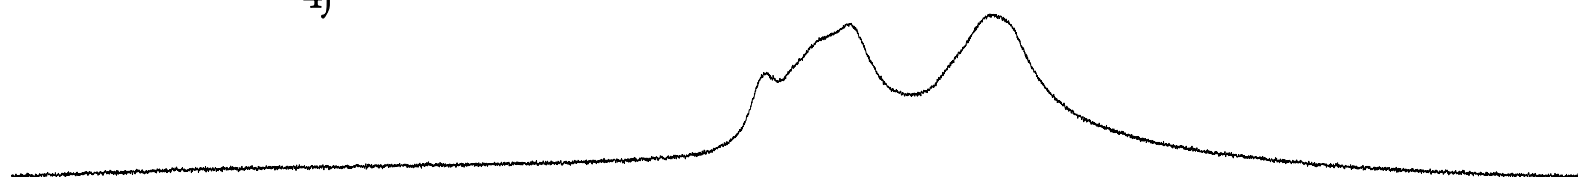

Current Data Parameters  
NAME CB5097-p-B-c  
EXPNO 6  
PROCNO 1

F2 - Acquisition Parameters  
Date\_ 20210307  
Time 10.40 h  
INSTRUM spect  
PROBHD Z119470\_0283 (  
PULPROG zg  
TD 32768  
SOLVENT CDCl3  
NS 64  
DS 4  
SWH 24038.461 Hz  
FIDRES 1.467191 Hz  
AQ 0.6815744 sec  
RG 206.72  
DW 20.800 usec  
DE 6.50 usec  
TE 295.2 K  
D1 1.00000000 sec  
TD0 1  
SF01 160.4615792 MHz  
NUC1 11B  
P1 16.00 usec  
PLW1 50.00000000 W

F2 - Processing parameters  
SI 16384  
SF 160.4615997 MHz  
WDW EM  
SSB 0  
LB 1.00 Hz  
GB 0  
PC 1.40

25 20 15 10 5 0 -5 -10 -15 -20 -25 -30 -35 ppm

CB5100-p-H

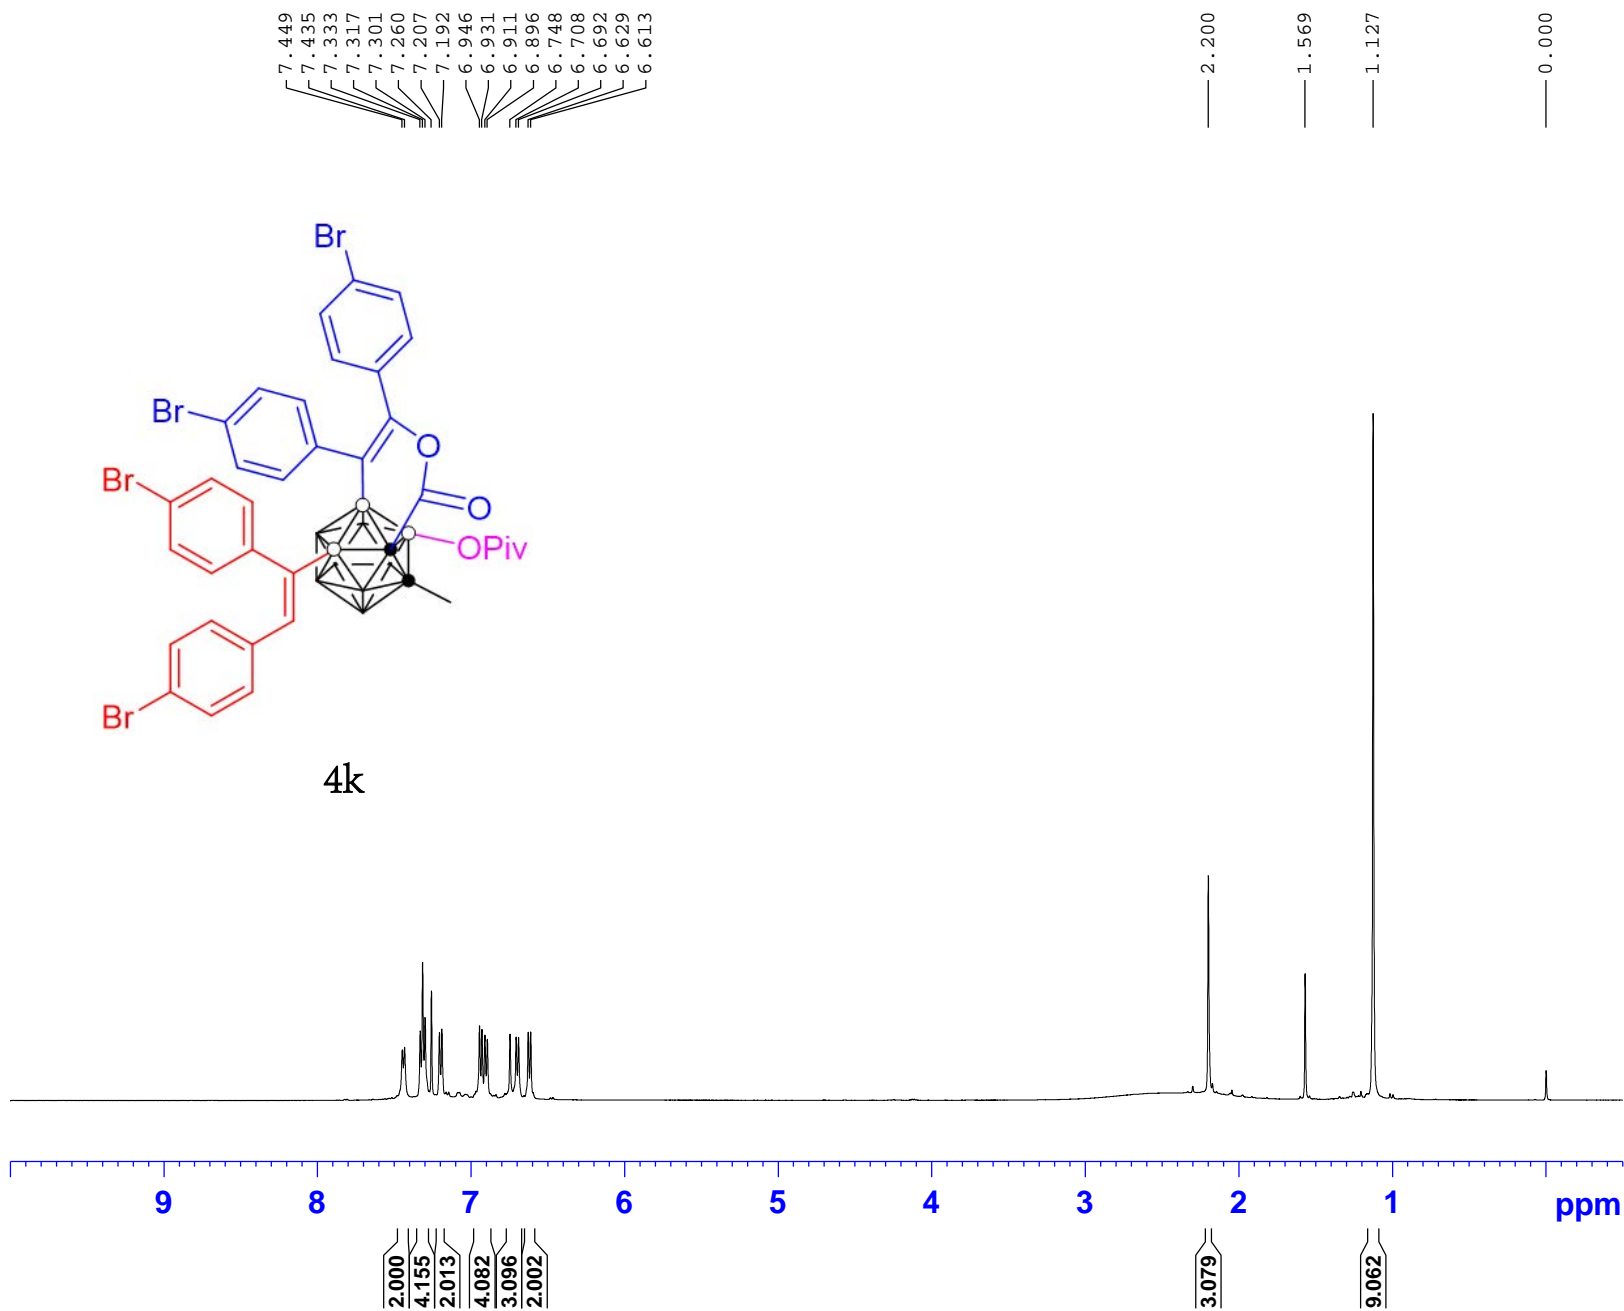

Current Data Parameters  
NAME CB5100-p-H  
EXPNO 8  
PROCNO 1

F2 - Acquisition Parameters  
Date\_ 20210307  
Time 11.52 h  
INSTRUM spect  
PROBHD Z119470\_0283 (  
PULPROG zg30  
TD 65536  
SOLVENT CDC13  
NS 16  
DS 2  
SWH 10000.000 Hz  
FIDRES 0.305176 Hz  
AQ 3.2767999 sec  
RG 56.83  
DW 50.000 usec  
DE 6.50 usec  
TE 295.2 K  
D1 1.00000000 sec  
TD0 1  
SFO1 500.1330883 MHz  
NUC1 1H  
P1 10.91 usec  
PLW1 25.00000000 W

F2 - Processing parameters  
SI 65536  
SF 500.1300128 MHz  
WDW EM  
SSB 0  
LB 0.30 Hz  
GB 0  
PC 1.00

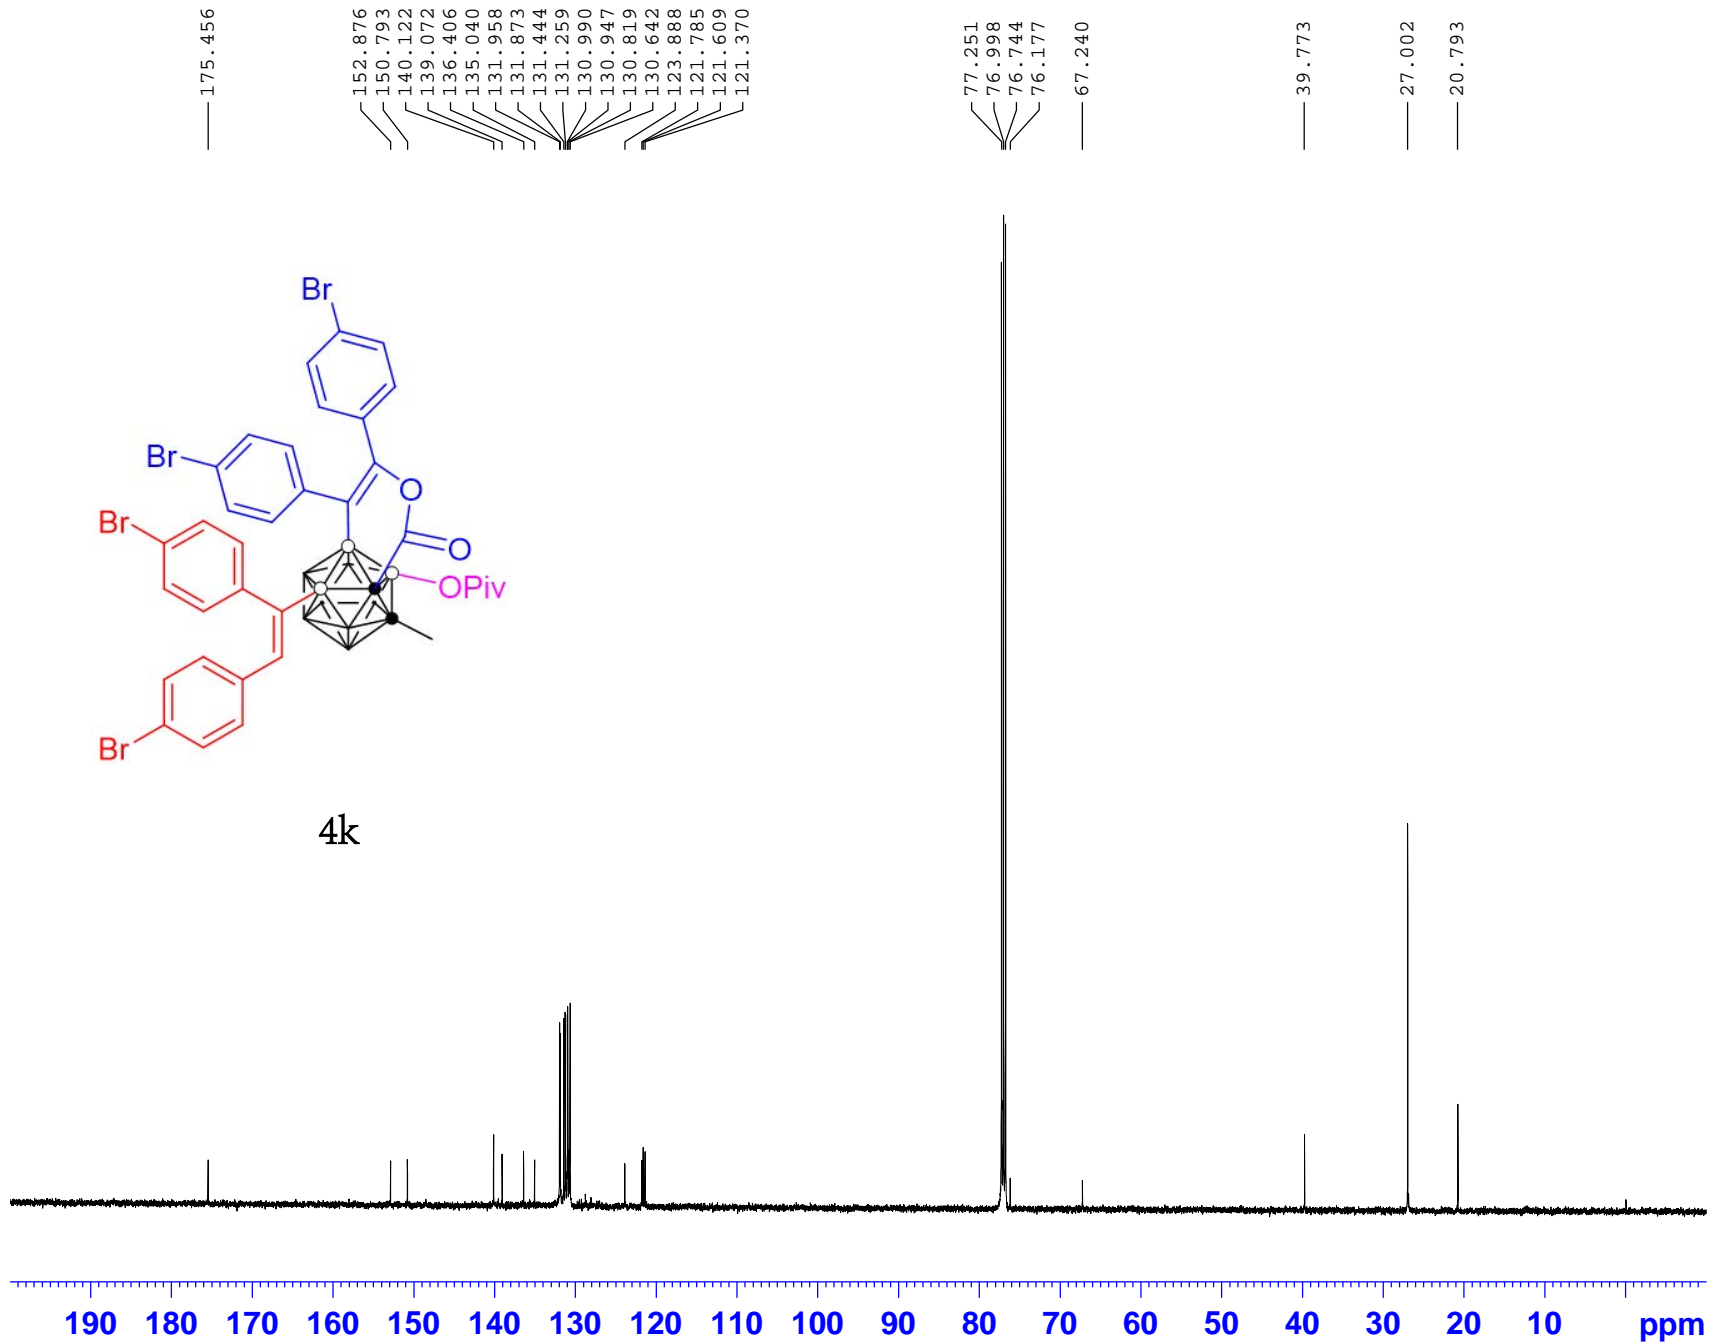

```

Current Data Parameters
NAME      CB5100-p-C
EXPNO    7
PROCNO   1

F2 - Acquisition Parameters
Date_    20210307
Time     12.55 h
INSTRUM  spect
PROBHD   Z119470_0283 (
PULPROG  zgpg30
TD       65536
SOLVENT  CDCl3
NS       1024
DS       4
SWH      29761.904 Hz
FIDRES   0.908261 Hz
AQ       1.1010048 sec
RG       206.72
DW       16.800 usec
DE       6.50 usec
TE       295.1 K
D1       2.00000000 sec
D11      0.03000000 sec
TD0      1
SF01     125.7703643 MHz
NUC1     13C
P1       9.75 usec
PLW1     94.00000000 W
SFO2     500.1320005 MHz
NUC2     1H
CPDPRG[2] waltz16
PCPD2    80.00 usec
PLW2     25.00000000 W
PLW12    0.46495000 W
PLW13    0.23387000 W

F2 - Processing parameters
SI       32768
SF       125.7577945 MHz
WDW      EM
SSB      0
LB       1.00 Hz
GB       0
PC       1.40

```

# $^{11}\text{B}\{^1\text{H}\}$ NMR

CB5100-B-dc

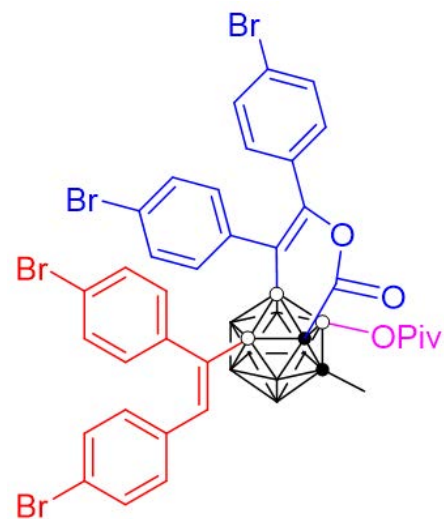

4k

— -3.47  
— -5.40  
— -7.13  
— -13.94

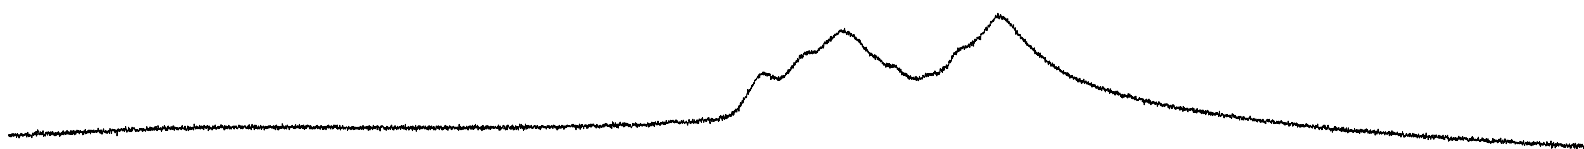

1.00  
1.08  
3.15  
5.02

25 20 15 10 5 0 -5 -10 -15 -20 -25 -30 -35 ppm

Current Data Parameters  
NAME CB5100-B-dc  
EXPNO 3  
PROCNO 1

F2 - Acquisition Parameters  
Date\_ 20210302  
Time 2.32 h  
INSTRUM spect  
PROBHD Z119470\_0283 (  
PULPROG zgpg30  
TD 32768  
SOLVENT CDCl3  
NS 32  
DS 4  
SWH 24038.461 Hz  
FIDRES 1.467191 Hz  
AQ 0.6815744 sec  
RG 206.72  
DW 20.800 usec  
DE 6.50 usec  
TE 295.1 K  
D1 1.00000000 sec  
D11 0.03000000 sec  
TD0 1  
SFO1 160.4615790 MHz  
NUC1 11B  
P1 16.00 usec  
PLW1 50.00000000 W  
SFO2 500.1320005 MHz  
NUC2 1H  
CPDPRG[2] waltz16  
PCPD2 80.00 usec  
PLW2 25.00000000 W  
PLW12 0.46495000 W  
PLW13 0.23387000 W

F2 - Processing parameters  
SI 16384  
SF 160.4615999 MHz  
WDW EM  
SSB 0  
LB 1.00 Hz  
GB 0  
PC 1.40

# $^{11}\text{B}$ NMR

CB5100-B-c

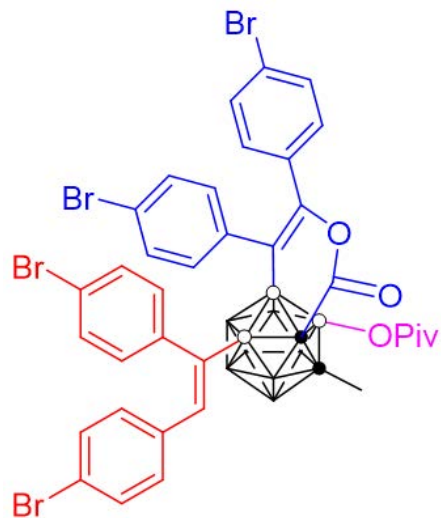

4k

— -3.24  
— -6.63  
— -13.47

Current Data Parameters  
NAME CB5100-B-c  
EXPNO 7  
PROCNO 1

F2 - Acquisition Parameters  
Date\_ 20210302  
Time 2.36 h  
INSTRUM spect  
PROBHD Z119470\_0283 (  
PULPROG zg  
TD 32768  
SOLVENT CDCl3  
NS 64  
DS 4  
SWH 24038.461 Hz  
FIDRES 1.467191 Hz  
AQ 0.6815744 sec  
RG 206.72  
DW 20.800 usec  
DE 6.50 usec  
TE 295.1 K  
D1 1.00000000 sec  
TD0 1  
SF01 160.4615792 MHz  
NUC1 11B  
P1 16.00 usec  
PLW1 50.00000000 W

F2 - Processing parameters  
SI 16384  
SF 160.4615997 MHz  
WDW EM  
SSB 0  
LB 1.00 Hz  
GB 0  
PC 1.40

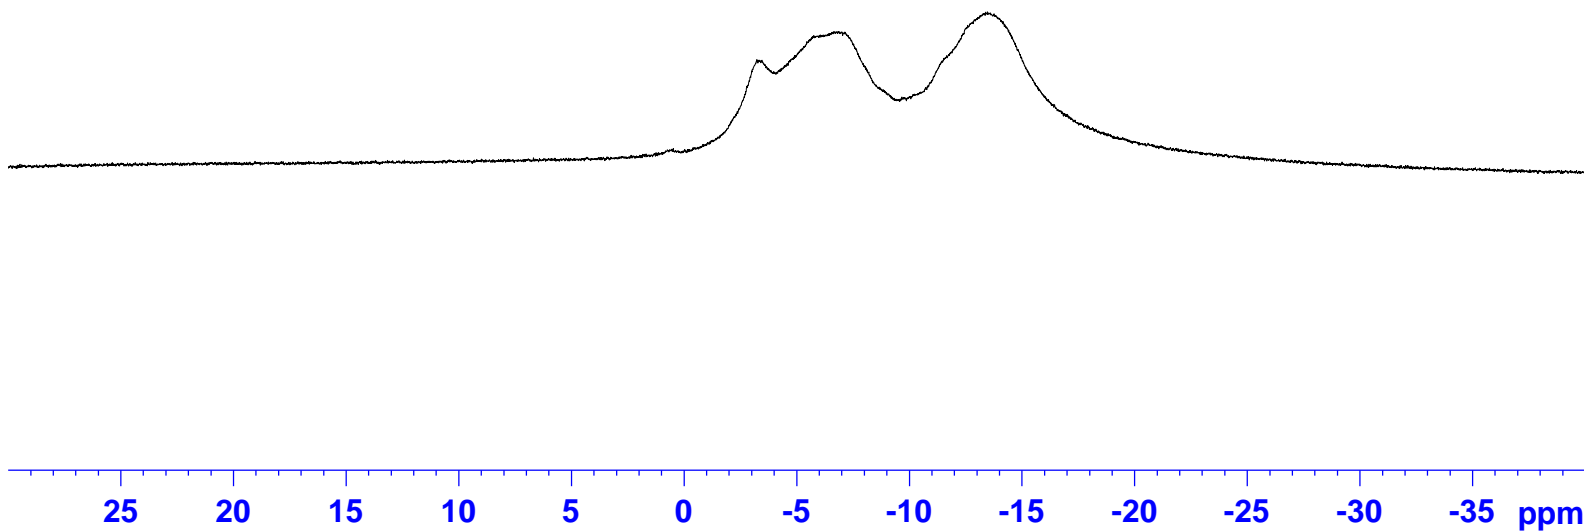

CB5009-p-H

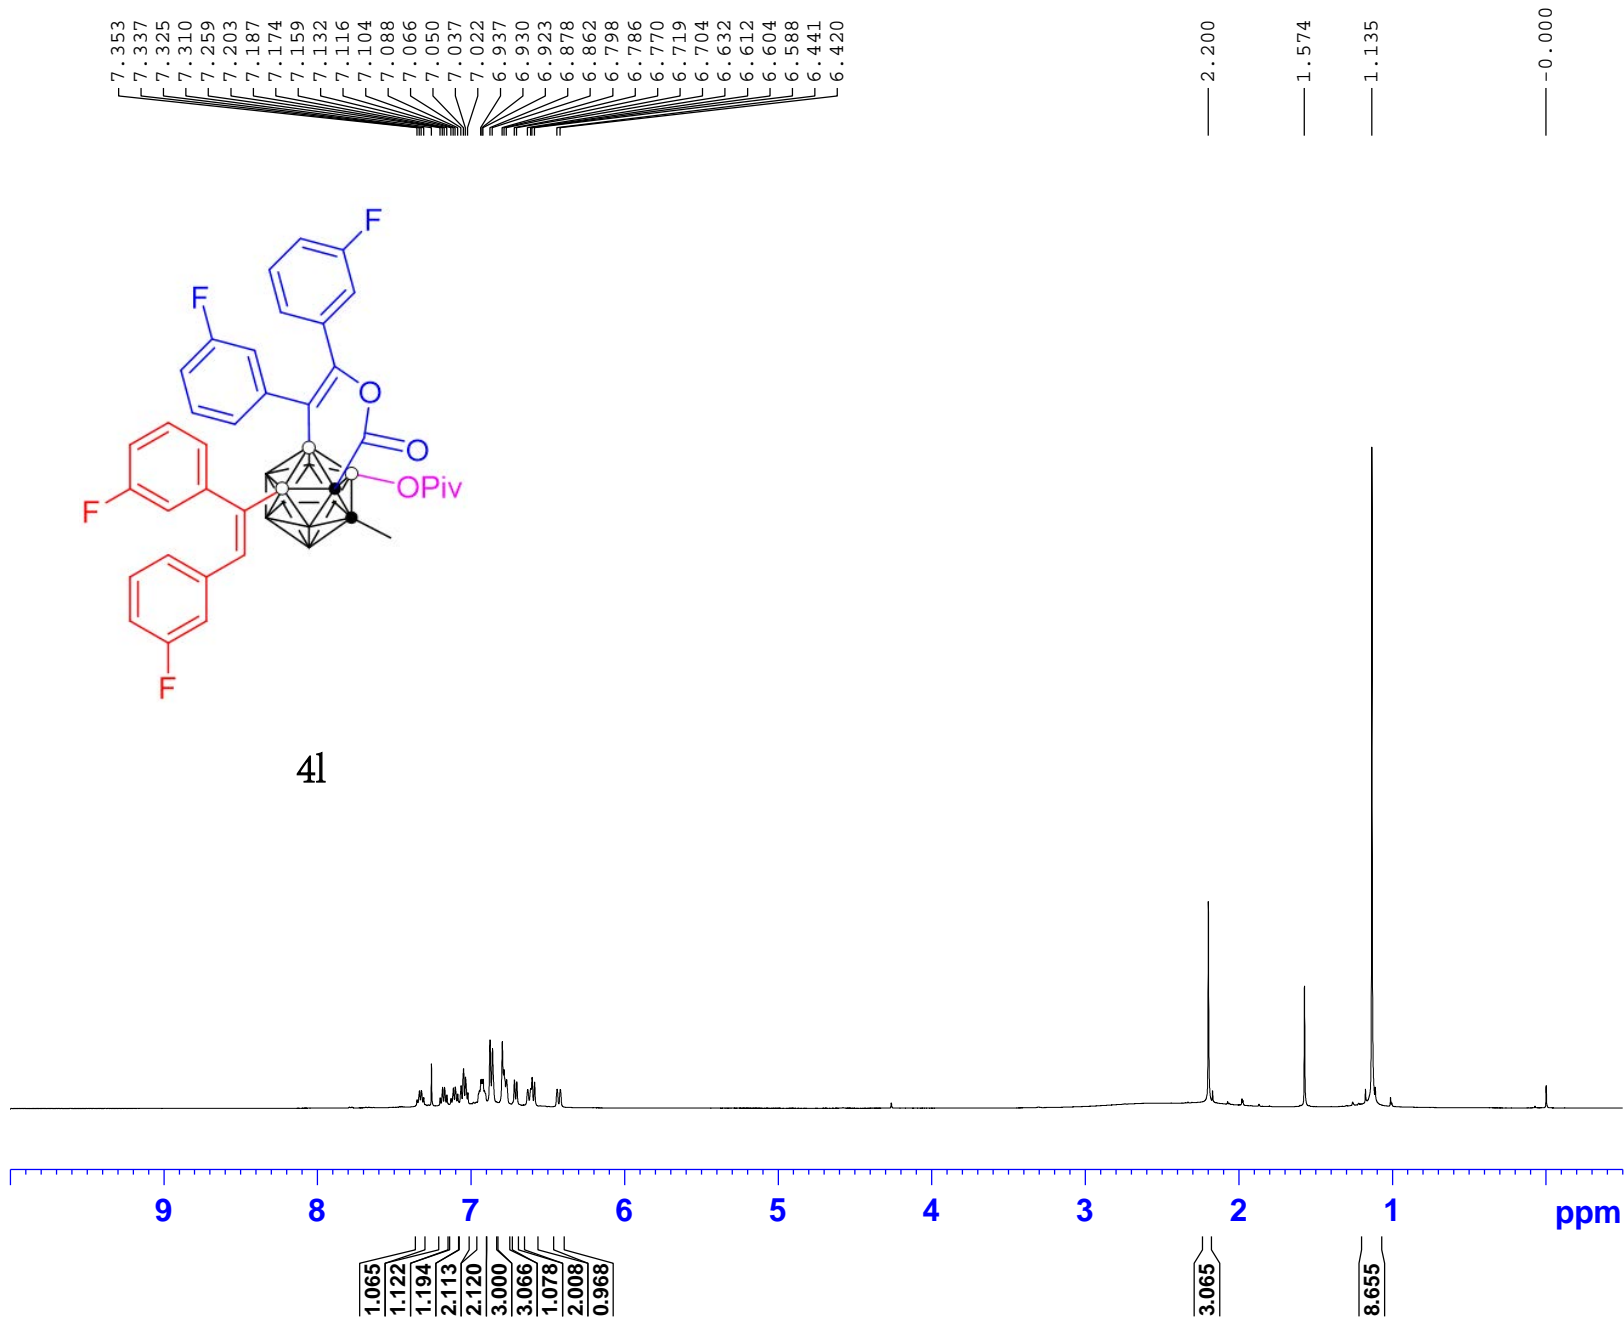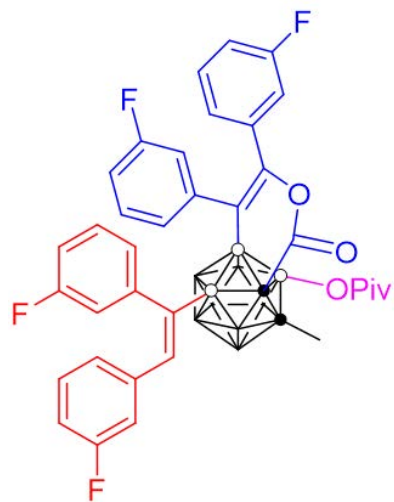

Current Data Parameters  
NAME CB5009-p-H  
EXPNO 9  
PROCNO 1

F2 - Acquisition Parameters  
Date\_ 20210307  
Time 20.47 h  
INSTRUM spect  
PROBHD Z119470\_0283 (  
PULPROG zg30  
TD 65536  
SOLVENT CDCl3  
NS 16  
DS 2  
SWH 10000.000 Hz  
FIDRES 0.305176 Hz  
AQ 3.2767999 sec  
RG 56.83  
DW 50.000 usec  
DE 6.50 usec  
TE 295.2 K  
D1 1.00000000 sec  
TD0 1  
SFO1 500.1330883 MHz  
NUC1 1H  
P1 10.91 usec  
PLW1 25.00000000 W

F2 - Processing parameters  
SI 65536  
SF 500.1300131 MHz  
WDW EM  
SSB 0  
LB 0.30 Hz  
GB 0  
PC 1.00



163.239  
 163.092  
 161.976  
 161.708  
 161.288  
 161.129  
 152.672  
 150.693  
 150.675  
 142.120  
 142.062  
 140.332  
 140.315  
 139.630  
 139.565  
 138.292  
 138.233  
 133.987  
 133.923  
 130.506  
 130.440  
 130.197  
 130.130  
 129.621  
 129.556  
 129.478  
 129.411  
 125.453  
 125.432  
 125.226  
 125.205  
 125.160  
 125.140  
 124.663  
 116.649  
 116.481  
 116.428  
 116.250  
 116.227  
 116.029  
 115.847  
 114.739  
 114.568  
 114.538  
 114.500  
 114.371  
 114.334  
 77.251  
 76.997  
 76.743  
 76.246  
 67.088

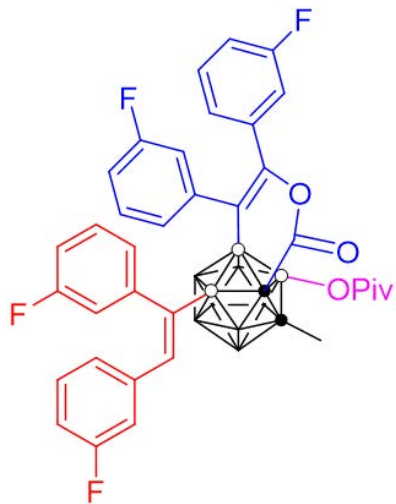

41

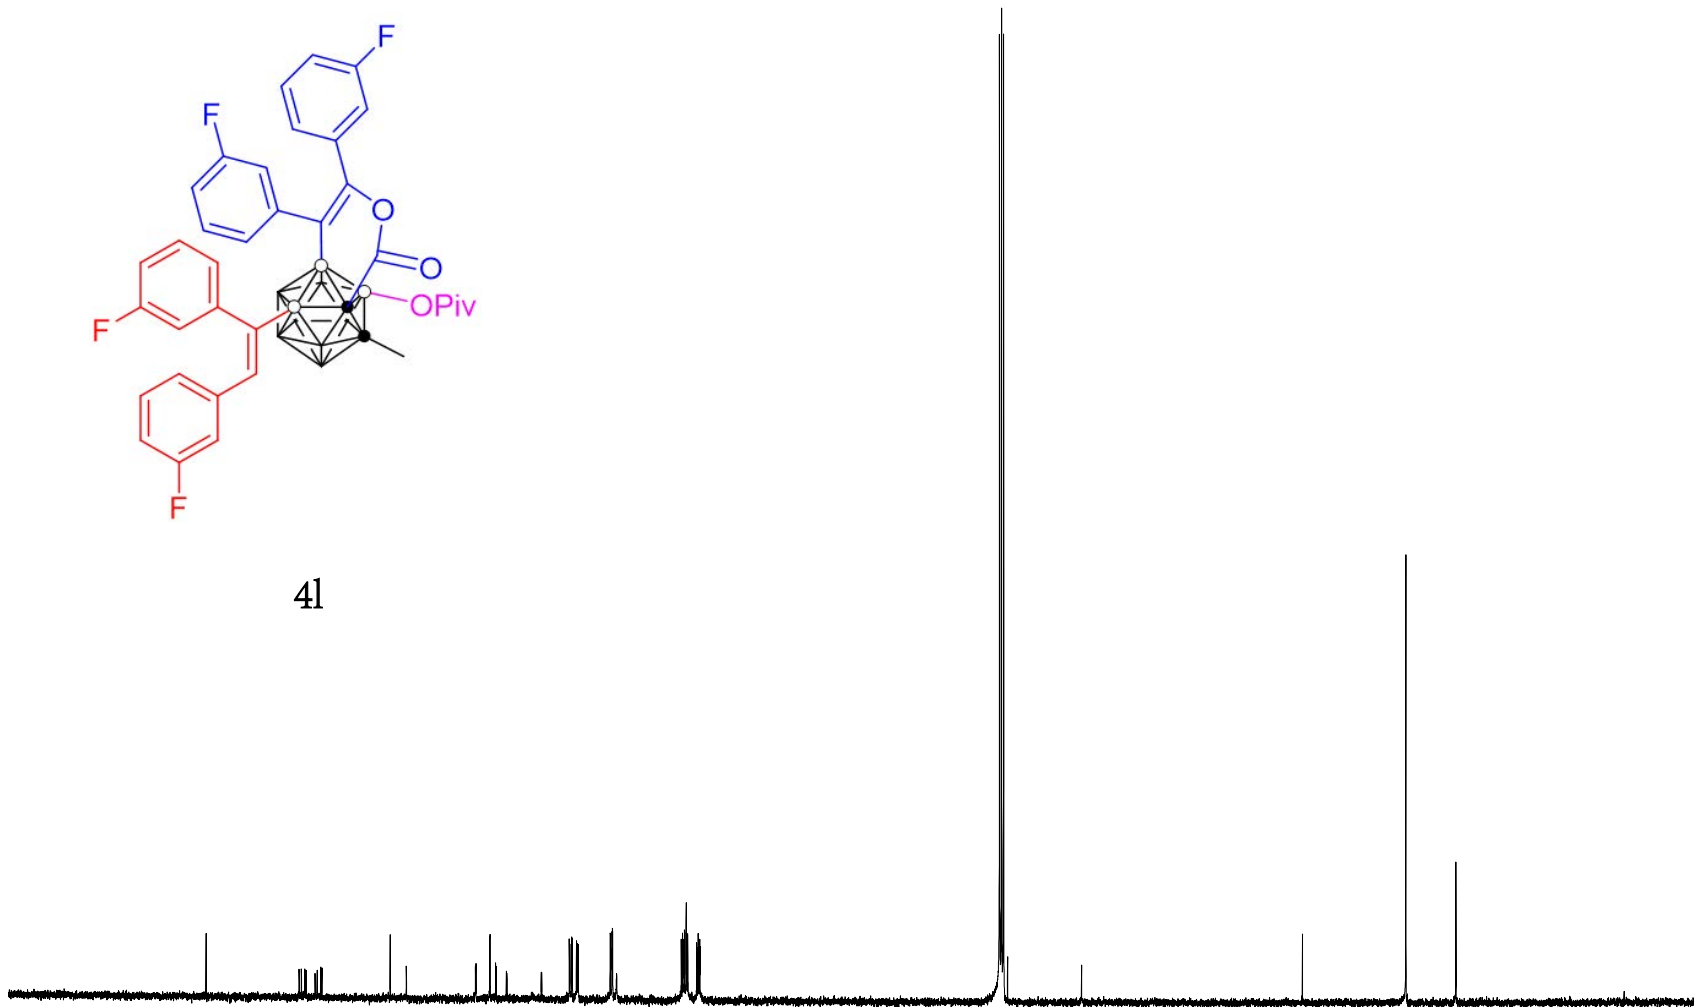

— 39.785  
 — 26.984  
 — 20.792

Current Data Parameters  
 NAME CB5009-p-C  
 EXPNO 7  
 PROCNO 1

F2 - Acquisition Parameters  
 Date\_ 20210307  
 Time 21.49 h  
 INSTRUM spect  
 PROBHD Z119470\_0283 (  
 PULPROG zgpg30  
 TD 65536  
 SOLVENT CDCl3  
 NS 1024  
 DS 4  
 SWH 29761.904 Hz  
 FIDRES 0.908261 Hz  
 AQ 1.1010048 sec  
 RG 206.72  
 DW 16.800 usec  
 DE 6.50 usec  
 TE 295.1 K  
 D1 2.0000000 sec  
 D11 0.0300000 sec  
 TD0 1  
 SFO1 125.7703643 MHz  
 NUC1 13C  
 P1 9.75 usec  
 PLW1 94.0000000 W  
 SFO2 500.1320005 MHz  
 NUC2 1H  
 CPDPRG[2] waltz16  
 PCPD2 80.00 usec  
 PLW2 25.0000000 W  
 PLW12 0.46495000 W  
 PLW13 0.23387000 W

F2 - Processing parameters  
 SI 32768  
 SF 125.7577936 MHz  
 WDW EM  
 SSB 0  
 LB 1.00 Hz  
 GB 0  
 PC 1.40

190 180 170 160 150 140 130 120 110 100 90 80 70 60 50 40 30 20 10 ppm

# $^{11}\text{B}\{^1\text{H}\}$ NMR

CB5009-p-B-dc

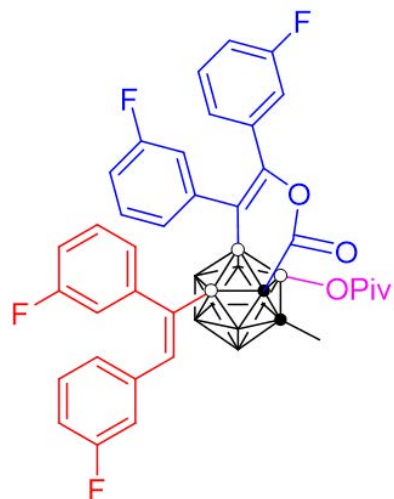

41

— -3.41  
— -5.34  
— -6.97  
— -13.75

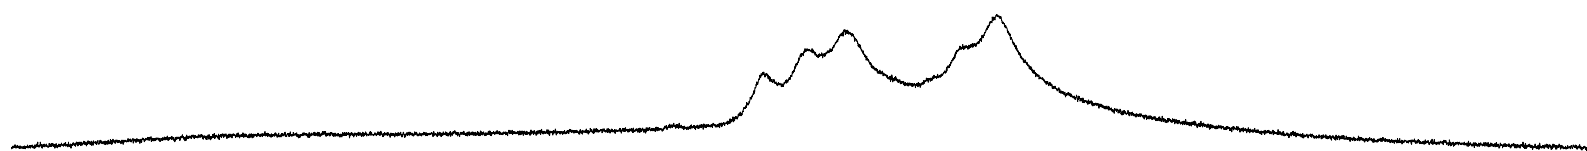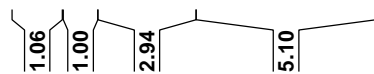

Current Data Parameters  
NAME CB5009-p-B-dc  
EXPNO 4  
PROCNO 1

F2 - Acquisition Parameters  
Date\_ 20210307  
Time 20.50 h  
INSTRUM spect  
PROBHD Z119470\_0283 (  
PULPROG zgpg30  
TD 32768  
SOLVENT CDCl3  
NS 32  
DS 4  
SWH 24038.461 Hz  
FIDRES 1.467191 Hz  
AQ 0.6815744 sec  
RG 206.72  
DW 20.800 usec  
DE 6.50 usec  
TE 295.1 K  
D1 1.00000000 sec  
D11 0.03000000 sec  
TD0 1  
SFO1 160.4615790 MHz  
NUC1 11B  
P1 16.00 usec  
PLW1 50.00000000 W  
SFO2 500.1320005 MHz  
NUC2 1H  
CPDPRG[2] waltz16  
PCPD2 80.00 usec  
PLW2 25.00000000 W  
PLW12 0.46495000 W  
PLW13 0.23387000 W

F2 - Processing parameters  
SI 16384  
SF 160.4615999 MHz  
WDW EM  
SSB 0  
LB 1.00 Hz  
GB 0  
PC 1.40

# <sup>11</sup>B NMR

CB5009-p-B-c

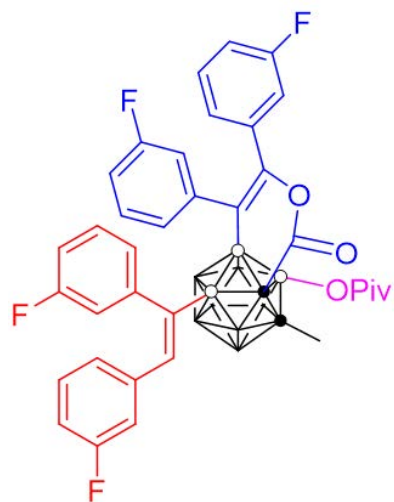

41

— -3.28  
— -5.64  
— -7.16  
— -13.21

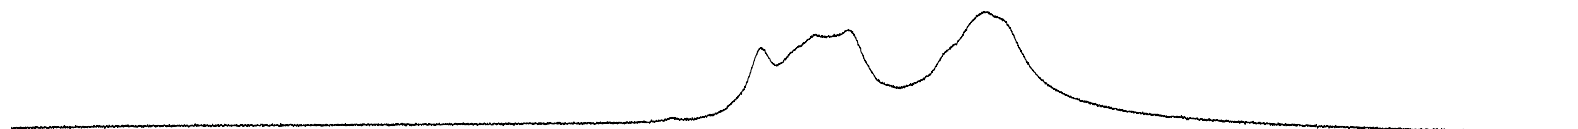

Current Data Parameters  
NAME CB5009-p-B-c  
EXPNO 9  
PROCNO 1

F2 - Acquisition Parameters  
Date\_ 20210307  
Time 20.53 h  
INSTRUM spect  
PROBHD Z119470\_0283 (  
PULPROG zg  
TD 32768  
SOLVENT CDCl3  
NS 64  
DS 4  
SWH 24038.461 Hz  
FIDRES 1.467191 Hz  
AQ 0.6815744 sec  
RG 206.72  
DW 20.800 usec  
DE 6.50 usec  
TE 295.2 K  
D1 1.00000000 sec  
TD0 1  
SF01 160.4615792 MHz  
NUC1 11B  
P1 16.00 usec  
PLW1 50.00000000 W

F2 - Processing parameters  
SI 16384  
SF 160.4615997 MHz  
WDW EM  
SSB 0  
LB 1.00 Hz  
GB 0  
PC 1.40

25 20 15 10 5 0 -5 -10 -15 -20 -25 -30 -35 ppm

CB5098-p-H

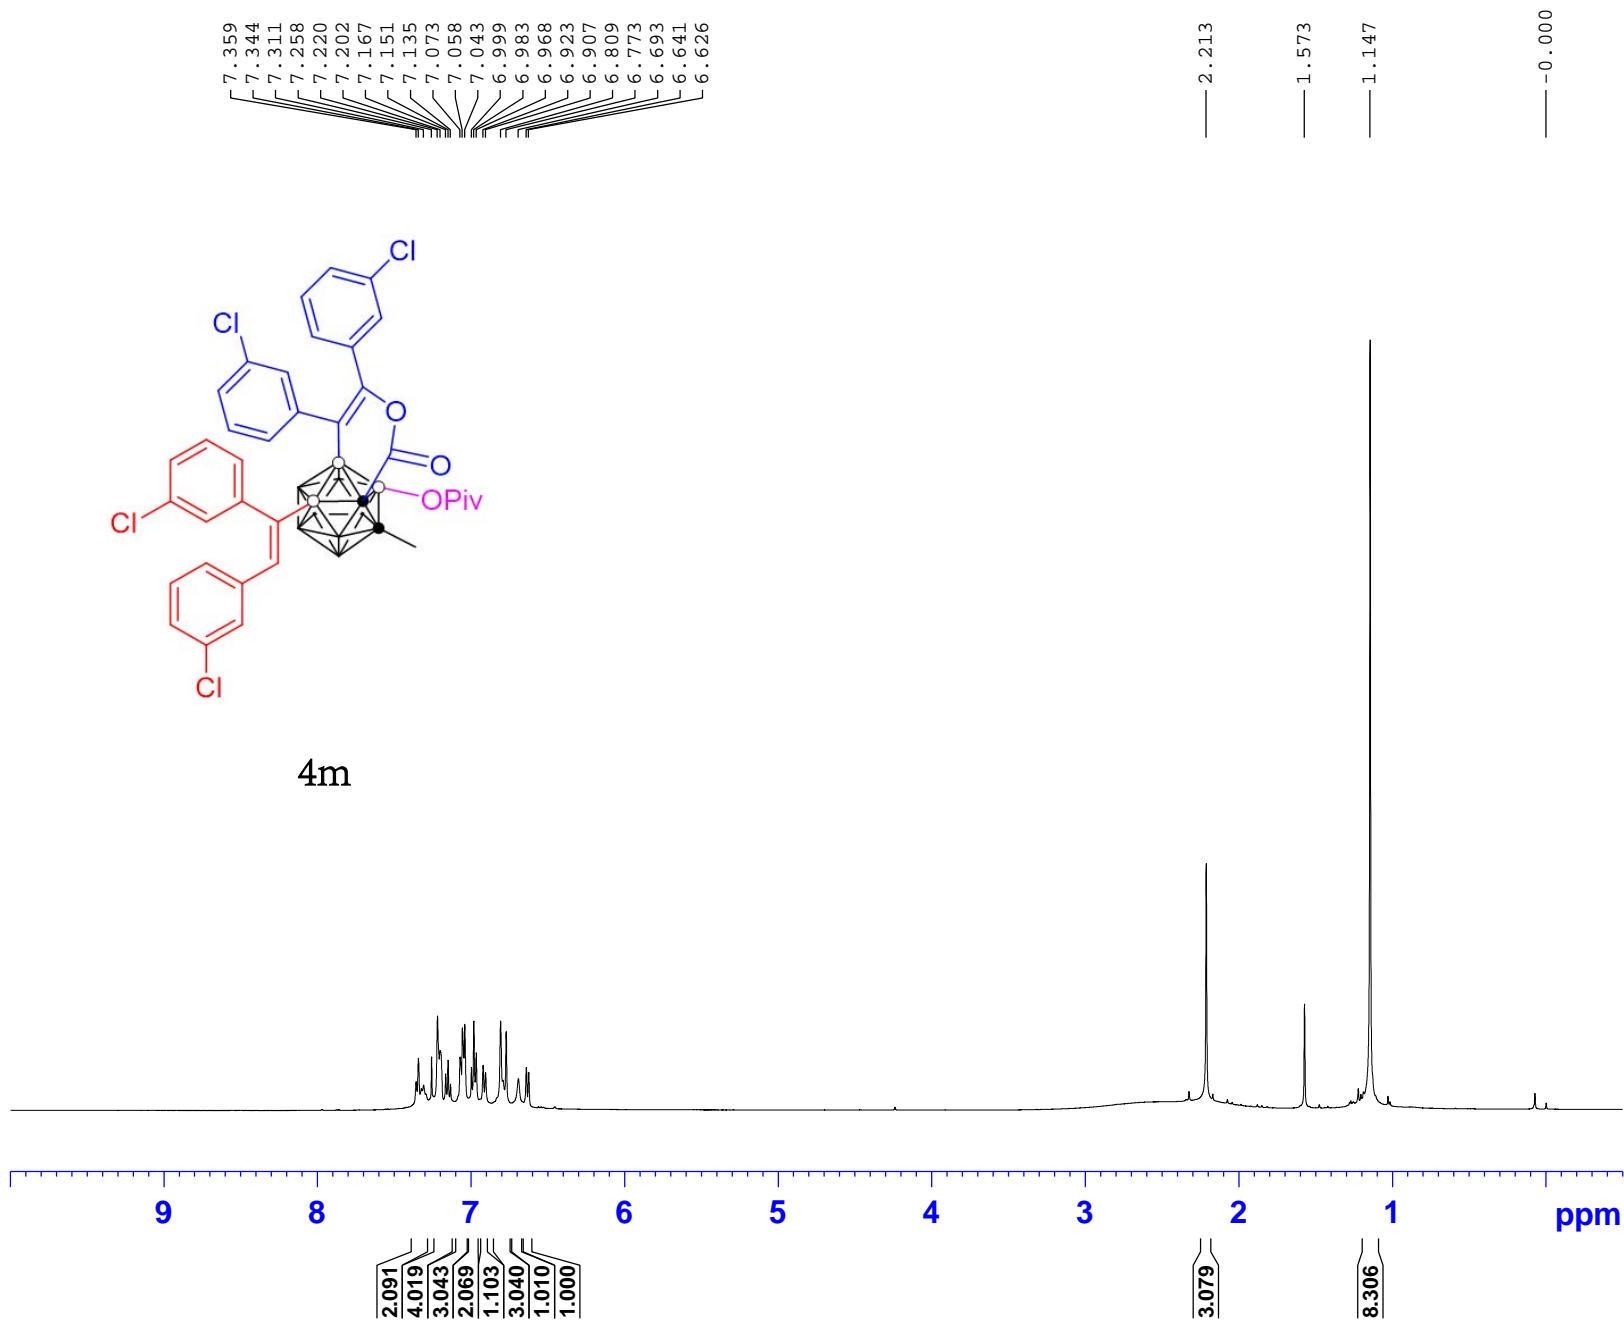

Current Data Parameters  
NAME CB5098-p-H  
EXPNO 5  
PROCNO 1

F2 - Acquisition Parameters  
Date\_ 20210307  
Time 8.18 h  
INSTRUM spect  
PROBHD Z119470\_0283 (  
PULPROG zg30  
TD 65536  
SOLVENT CDCl3  
NS 16  
DS 2  
SWH 10000.000 Hz  
FIDRES 0.305176 Hz  
AQ 3.2767999 sec  
RG 63.76  
DW 50.000 usec  
DE 6.50 usec  
TE 295.1 K  
D1 1.00000000 sec  
TD0 1  
SF01 500.1330883 MHz  
NUC1 1H  
P1 10.91 usec  
PLW1 25.00000000 W

F2 - Processing parameters  
SI 65536  
SF 500.1300141 MHz  
WDW EM  
SSB 0  
LB 0.30 Hz  
GB 0  
PC 1.00

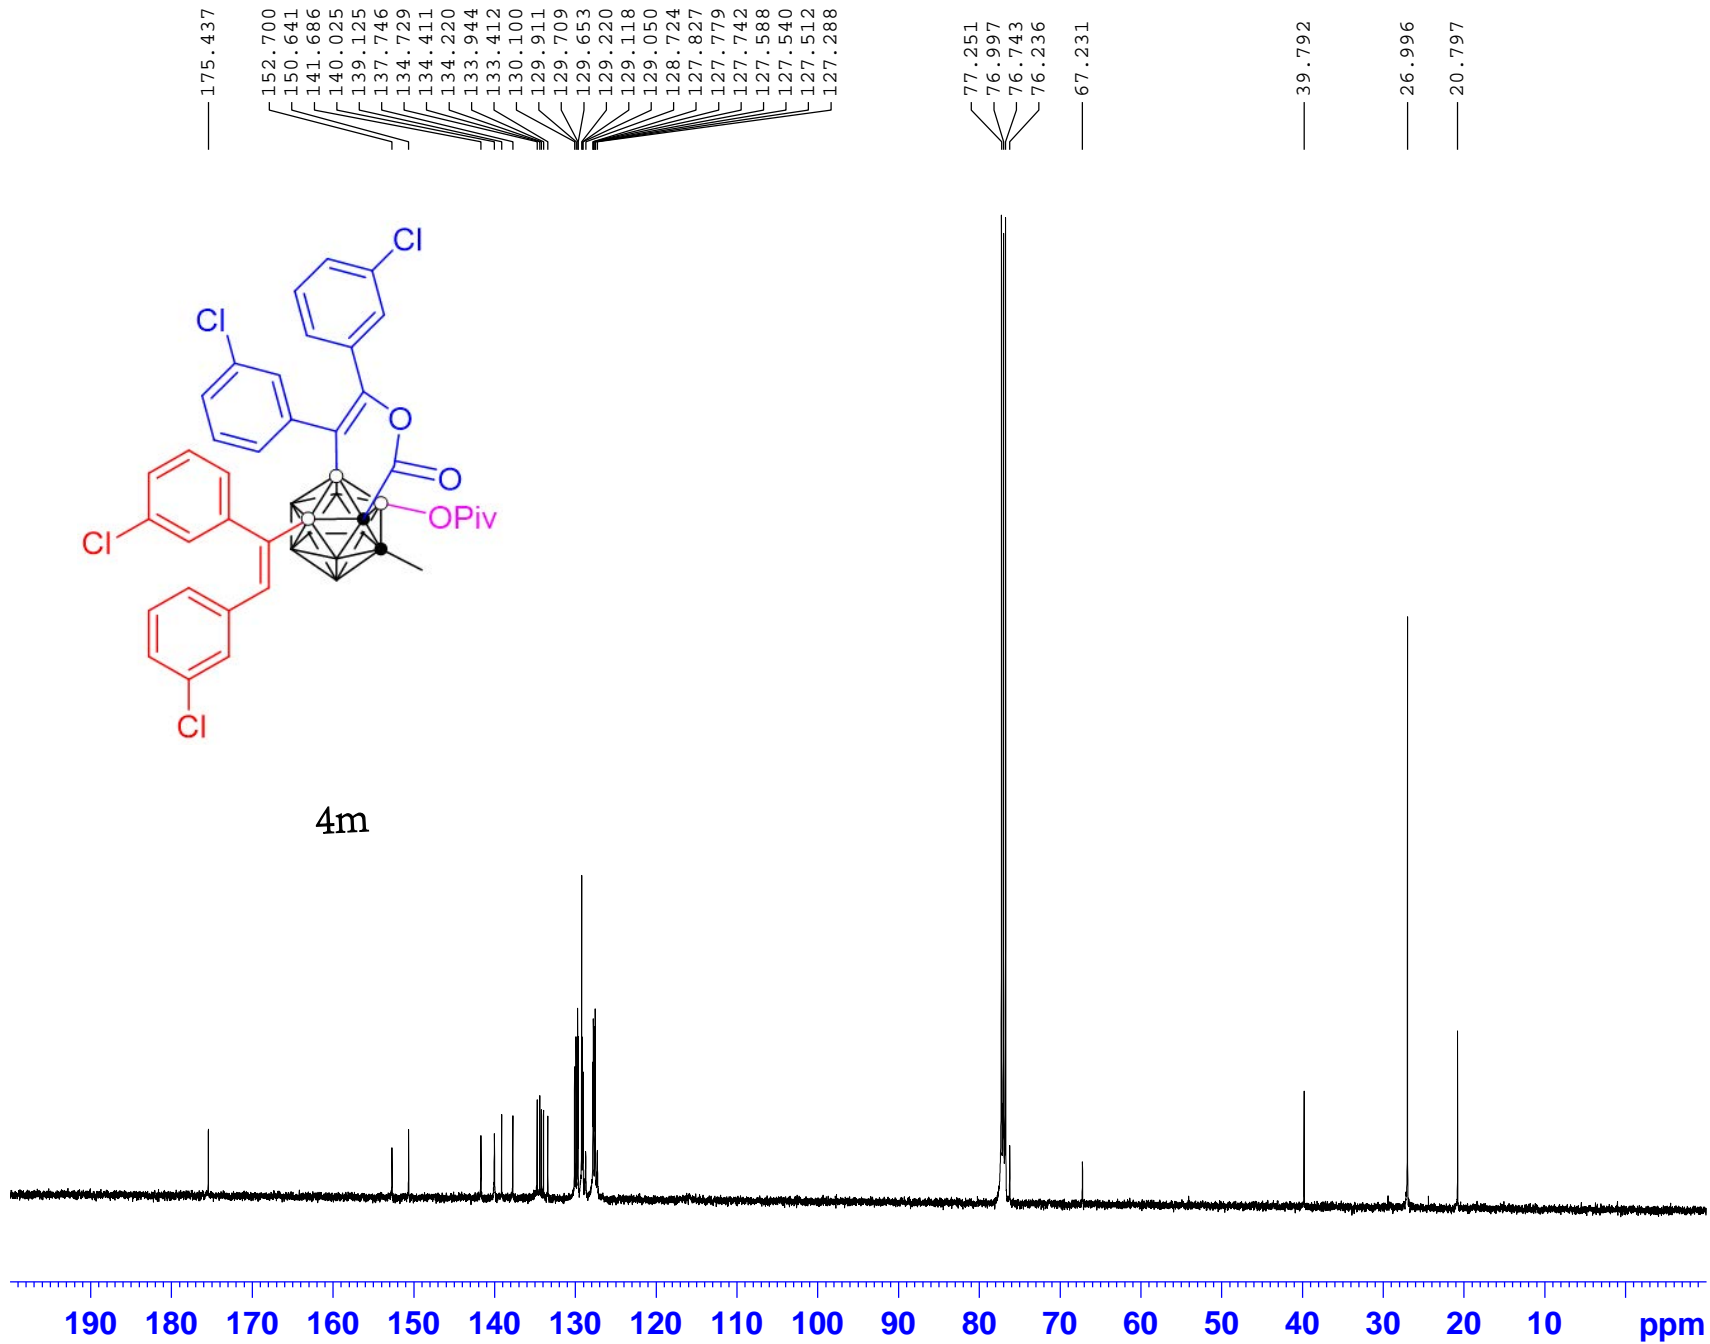

```

Current Data Parameters
NAME      CB5098-p-C
EXPNO    5
PROCNO   1

F2 - Acquisition Parameters
Date_    20210307
Time     9.21 h
INSTRUM  spect
PROBHD   Z119470_0283 (
PULPROG  zgpg30
TD       65536
SOLVENT  CDCl3
NS       1024
DS       4
SWH      29761.904 Hz
FIDRES   0.908261 Hz
AQ       1.1010048 sec
RG       206.72
DW       16.800 usec
DE       6.50 usec
TE       295.2 K
D1       2.00000000 sec
D11      0.03000000 sec
TD0      1
SFO1     125.7703643 MHz
NUC1     13C
P1       9.75 usec
PLW1     94.00000000 W
SFO2     500.1320005 MHz
NUC2     1H
CPDPRG[2] waltz16
PCPD2    80.00 usec
PLW2     25.00000000 W
PLW12    0.46495000 W
PLW13    0.23387000 W

F2 - Processing parameters
SI       32768
SF       125.7577949 MHz
WDW      EM
SSB      0
LB       1.00 Hz
GB       0
PC       1.40

```

# $^{11}\text{B}\{^1\text{H}\}$ NMR

CB5098-p-B-dc

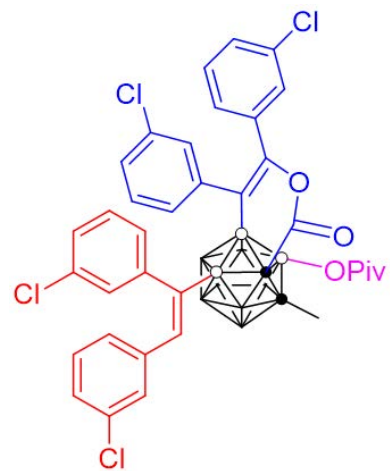

4m

— -3.42  
— -5.30  
— -6.97  
— -13.58

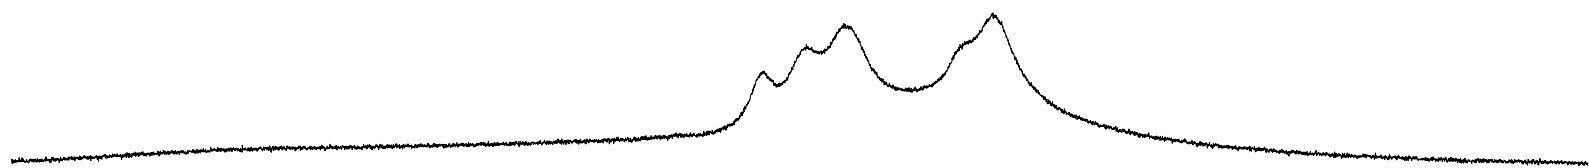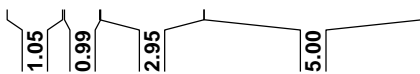

Current Data Parameters  
NAME CB5098-p-B-dc  
EXPNO 4  
PROCNO 1

F2 - Acquisition Parameters  
Date\_ 20210307  
Time 8.21 h  
INSTRUM spect  
PROBHD Z119470\_0283 (  
PULPROG zgpg30  
TD 32768  
SOLVENT CDCl3  
NS 32  
DS 4  
SWH 24038.461 Hz  
FIDRES 1.467191 Hz  
AQ 0.6815744 sec  
RG 206.72  
DW 20.800 usec  
DE 6.50 usec  
TE 295.1 K  
D1 1.00000000 sec  
D11 0.03000000 sec  
TD0 1  
SFO1 160.4615790 MHz  
NUC1 11B  
P1 16.00 usec  
PLW1 50.00000000 W  
SFO2 500.1320005 MHz  
NUC2 1H  
CPDPRG[2] waltz16  
PCPD2 80.00 usec  
PLW2 25.00000000 W  
PLW12 0.46495000 W  
PLW13 0.23387000 W

F2 - Processing parameters  
SI 16384  
SF 160.4615999 MHz  
WDW EM  
SSB 0  
LB 1.00 Hz  
GB 0  
PC 1.40

# $^{11}\text{B}$ NMR

CB5098-p-B-c

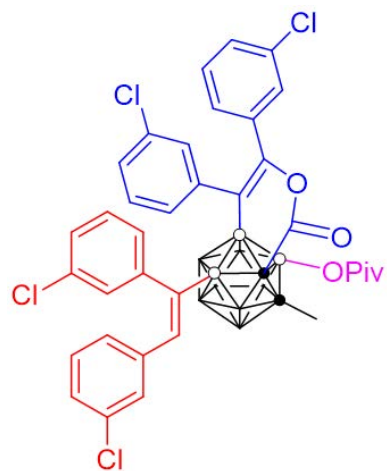

4m

— -3.30  
— -7.19  
— -13.24

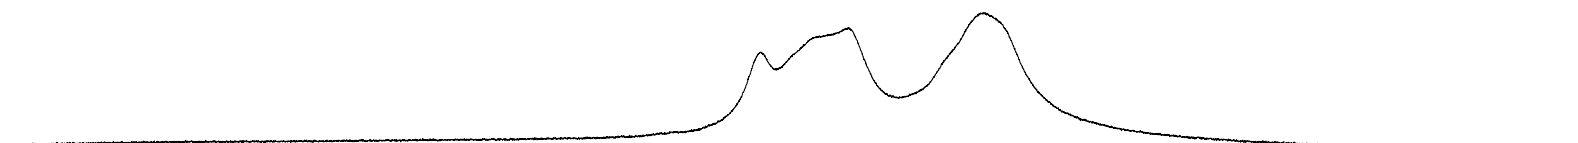

Current Data Parameters  
NAME CB5098-p-B-c  
EXPNO 5  
PROCNO 1

F2 - Acquisition Parameters  
Date\_ 20210307  
Time 8.25 h  
INSTRUM spect  
PROBHD Z119470\_0283 (  
PULPROG zg  
TD 32768  
SOLVENT CDCl3  
NS 64  
DS 4  
SWH 24038.461 Hz  
FIDRES 1.467191 Hz  
AQ 0.6815744 sec  
RG 206.72  
DW 20.800 usec  
DE 6.50 usec  
TE 295.2 K  
D1 1.00000000 sec  
TD0 1  
SF01 160.4615792 MHz  
NUC1 11B  
P1 16.00 usec  
PLW1 50.00000000 W

F2 - Processing parameters  
SI 16384  
SF 160.4615997 MHz  
WDW EM  
SSB 0  
LB 1.00 Hz  
GB 0  
PC 1.40

25 20 15 10 5 0 -5 -10 -15 -20 -25 -30 -35 ppm

CB5101-p-H

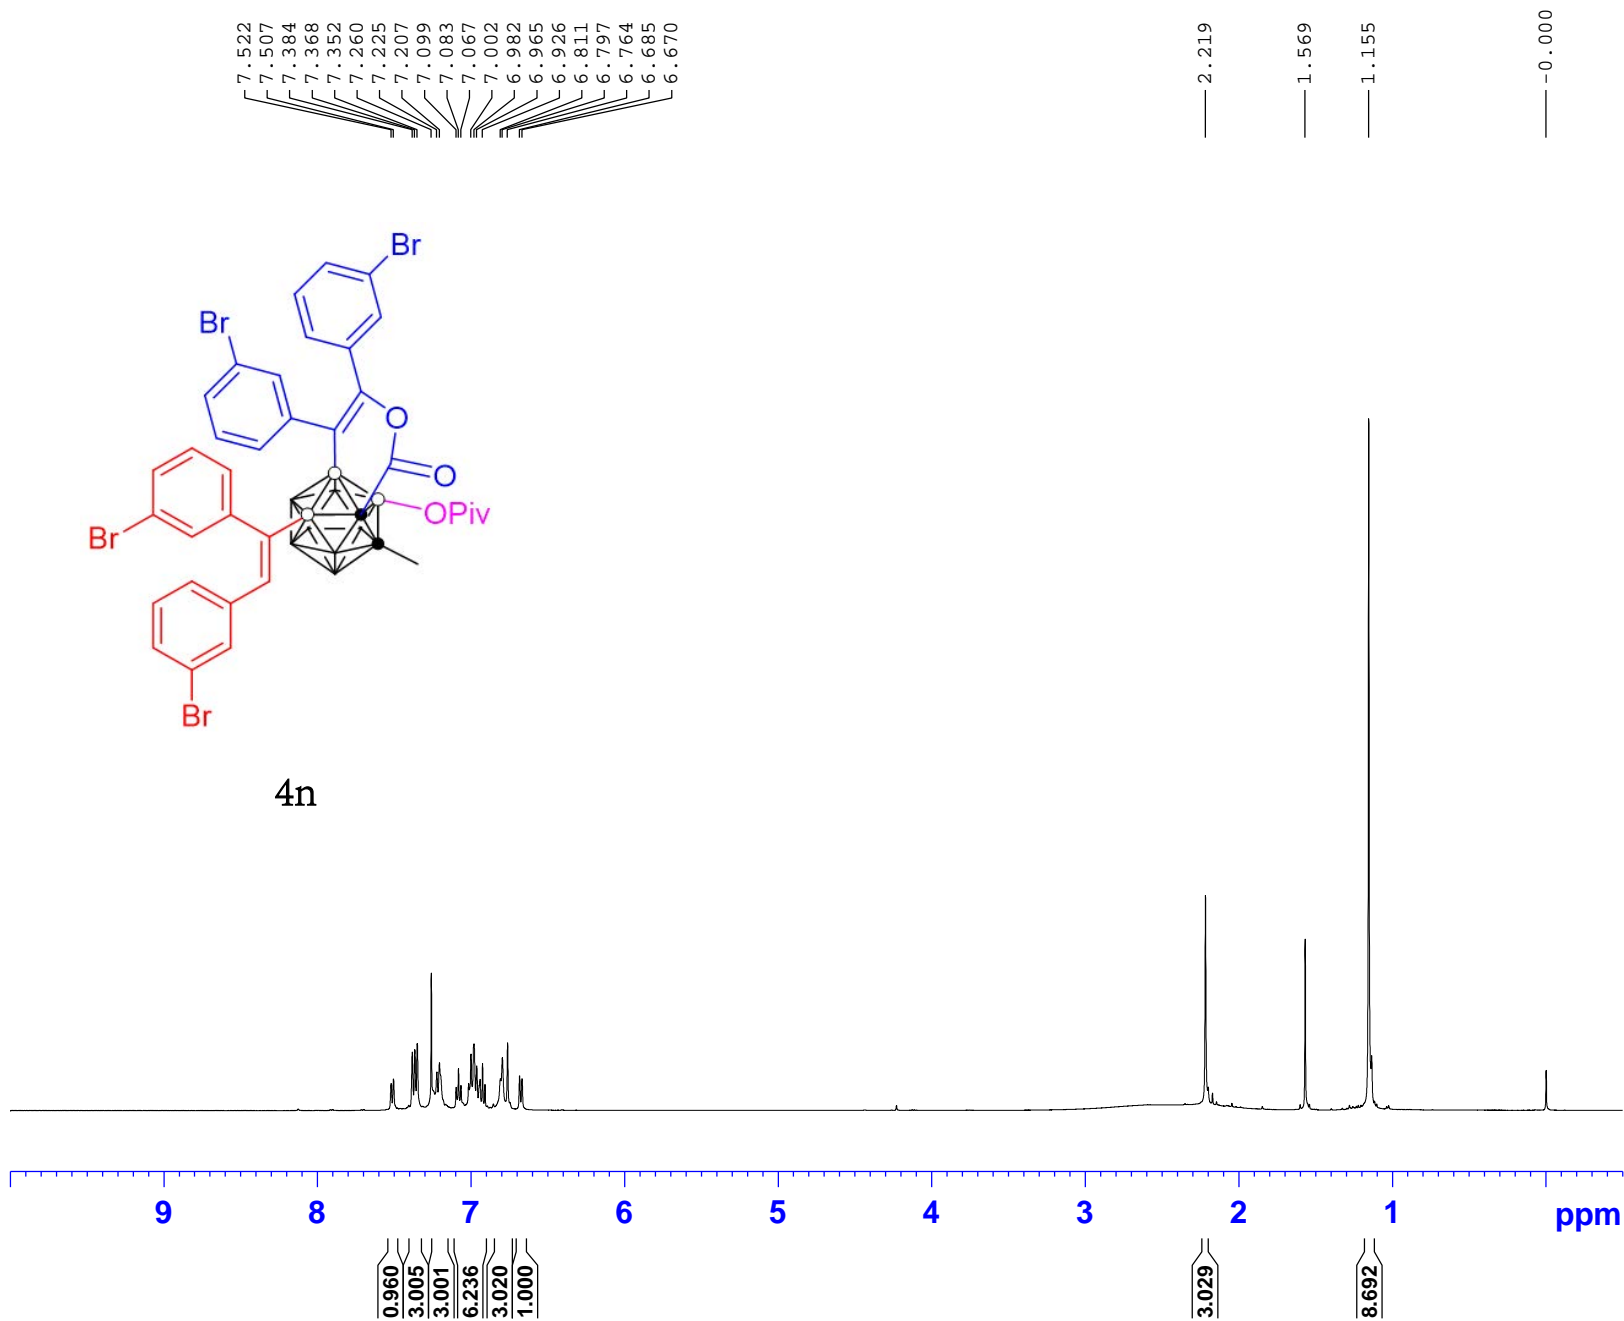

Current Data Parameters  
 NAME CB5101-p-H  
 EXPNO 6  
 PROCNO 1

F2 - Acquisition Parameters  
 Date\_ 20210307  
 Time 13.04 h  
 INSTRUM spect  
 PROBHD Z119470\_0283 (  
 PULPROG zg30  
 TD 65536  
 SOLVENT CDCl3  
 NS 16  
 DS 2  
 SWH 10000.000 Hz  
 FIDRES 0.305176 Hz  
 AQ 3.2767999 sec  
 RG 56.83  
 DW 50.000 usec  
 DE 6.50 usec  
 TE 295.2 K  
 D1 1.00000000 sec  
 TD0 1  
 SFO1 500.1330883 MHz  
 NUC1 1H  
 P1 10.91 usec  
 PLW1 25.00000000 W

F2 - Processing parameters  
 SI 65536  
 SF 500.1300117 MHz  
 WDW EM  
 SSB 0  
 LB 0.30 Hz  
 GB 0  
 PC 1.00



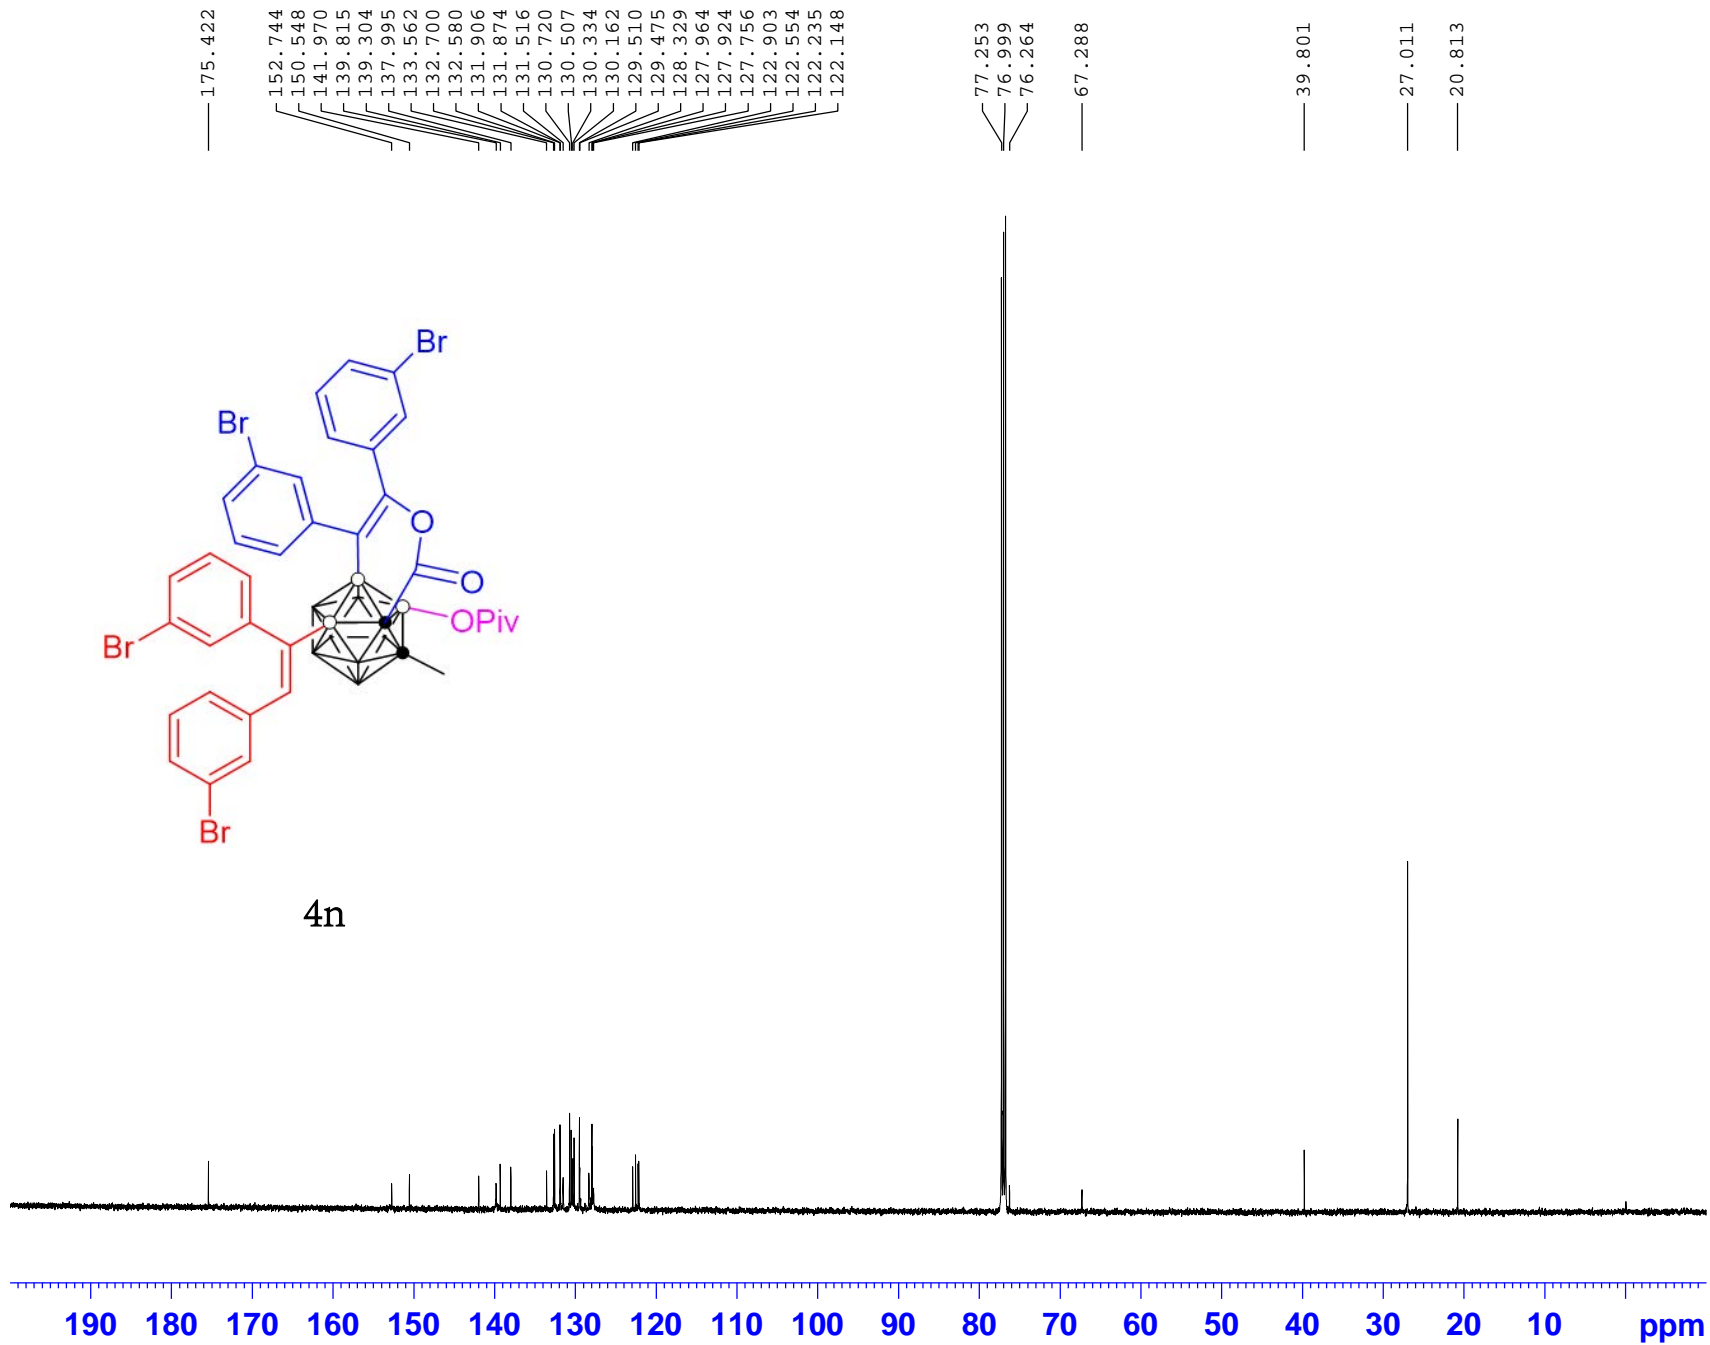

Current Data Parameters  
 NAME CB5101-p-C  
 EXPNO 8  
 PROCNO 1

F2 - Acquisition Parameters  
 Date\_ 20210307  
 Time 14.06 h  
 INSTRUM spect  
 PROBHD Z119470\_0283 (  
 PULPROG zgpg30  
 TD 65536  
 SOLVENT CDC13  
 NS 1024  
 DS 4  
 SWH 29761.904 Hz  
 FIDRES 0.908261 Hz  
 AQ 1.1010048 sec  
 RG 206.72  
 DW 16.800 usec  
 DE 6.50 usec  
 TE 295.1 K  
 D1 2.00000000 sec  
 D11 0.03000000 sec  
 TD0 1  
 SFO1 125.7703643 MHz  
 NUC1 13C  
 P1 9.75 usec  
 PLW1 94.00000000 W  
 SFO2 500.1320005 MHz  
 NUC2 1H  
 CPDPRG[2] waltz16  
 PCPD2 80.00 usec  
 PLW2 25.00000000 W  
 PLW12 0.46495000 W  
 PLW13 0.23387000 W

F2 - Processing parameters  
 SI 32768  
 SF 125.7577936 MHz  
 WDW EM  
 SSB 0  
 LB 1.00 Hz  
 GB 0  
 PC 1.40

# $^{11}\text{B}\{^1\text{H}\}$ NMR

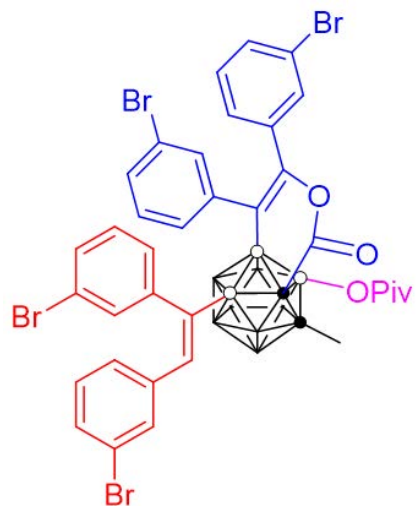

4n

— -3.44  
— -5.41  
— -7.23  
— -13.87

CB5101-p-B-dc

Current Data Parameters  
NAME CB5101-p-B-dc  
EXPNO 5  
PROCNO 1

F2 - Acquisition Parameters  
Date\_ 20210307  
Time 13.07 h  
INSTRUM spect  
PROBHD Z119470\_0283 (  
PULPROG zgpg30  
TD 32768  
SOLVENT CDCl3  
NS 32  
DS 4  
SWH 24038.461 Hz  
FIDRES 1.467191 Hz  
AQ 0.6815744 sec  
RG 206.72  
DW 20.800 usec  
DE 6.50 usec  
TE 295.1 K  
D1 1.00000000 sec  
D11 0.03000000 sec  
TD0 1  
SFO1 160.4615790 MHz  
NUC1  $^{11}\text{B}$   
P1 16.00 usec  
PLW1 50.00000000 W  
SFO2 500.1320005 MHz  
NUC2  $^1\text{H}$   
CPDPRG[2] waltz16  
PCPD2 80.00 usec  
PLW2 25.00000000 W  
PLW12 0.46495000 W  
PLW13 0.23387000 W

F2 - Processing parameters  
SI 16384  
SF 160.4615999 MHz  
WDW EM  
SSB 0  
LB 1.00 Hz  
GB 0  
PC 1.40

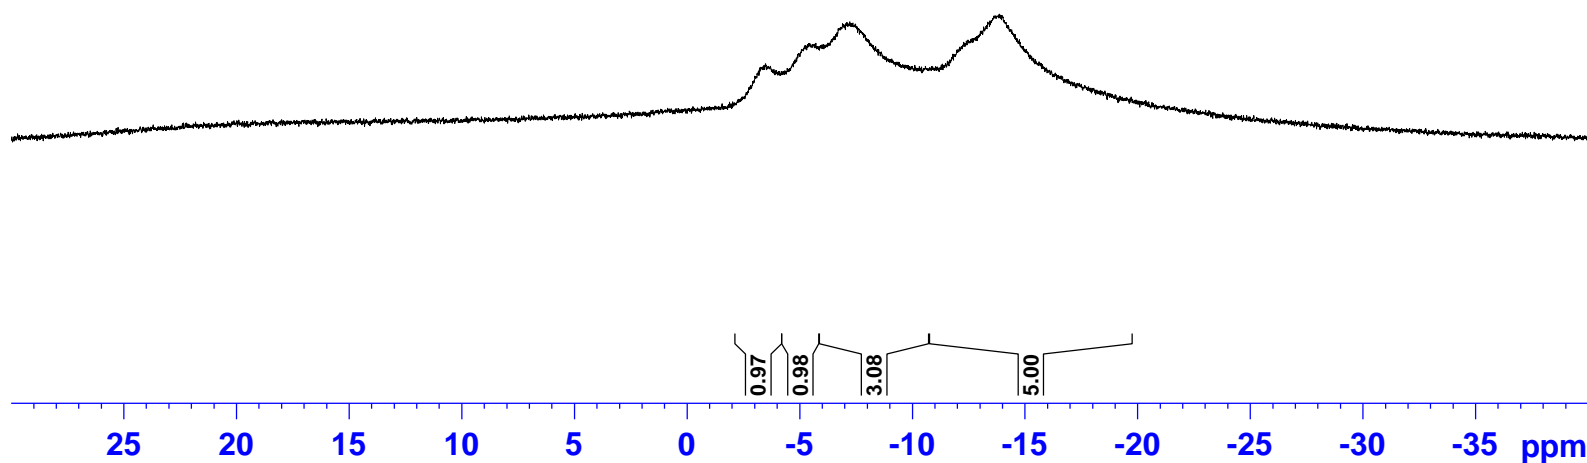

# $^{11}\text{B}$ NMR

CB5101-p-B-c

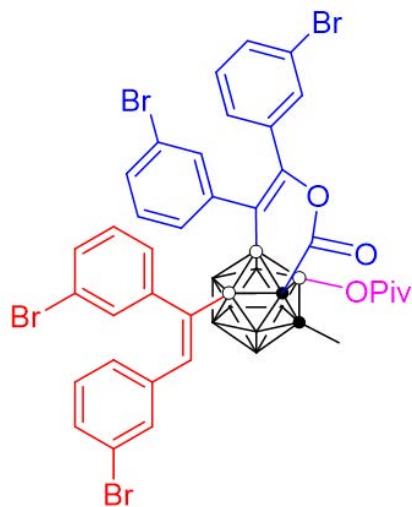

4n

— -3.35  
— -7.32  
— -13.37

Current Data Parameters  
NAME CB5101-p-B-c  
EXPNO 9  
PROCNO 1

F2 - Acquisition Parameters  
Date\_ 20210307  
Time 13.10 h  
INSTRUM spect  
PROBHD Z119470\_0283 (  
PULPROG zg  
TD 32768  
SOLVENT CDCl3  
NS 64  
DS 4  
SWH 24038.461 Hz  
FIDRES 1.467191 Hz  
AQ 0.6815744 sec  
RG 206.72  
DW 20.800 usec  
DE 6.50 usec  
TE 295.1 K  
D1 1.00000000 sec  
TD0 1  
SF01 160.4615792 MHz  
NUC1 11B  
P1 16.00 usec  
PLW1 50.00000000 W

F2 - Processing parameters  
SI 16384  
SF 160.4615997 MHz  
WDW EM  
SSB 0  
LB 1.00 Hz  
GB 0  
PC 1.40

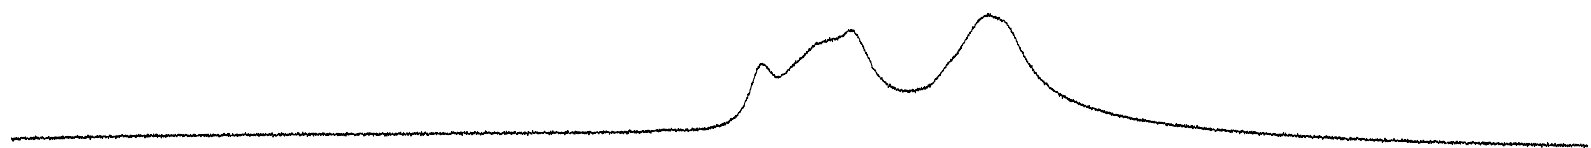

25 20 15 10 5 0 -5 -10 -15 -20 -25 -30 -35 ppm

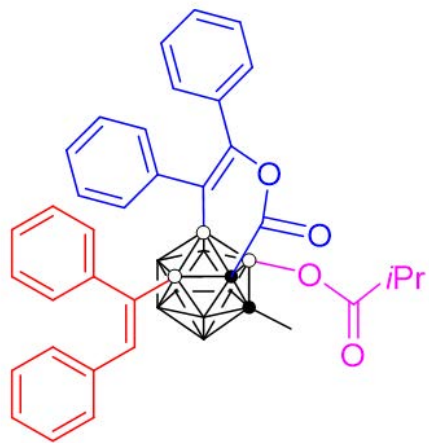

4o

7.331  
7.317  
7.253  
7.177  
7.174  
7.167  
7.134  
7.130  
7.118  
7.037  
7.034  
7.024  
6.941  
6.937  
6.930  
6.852  
6.796  
6.793  
6.782  
6.778

2.565  
2.551  
2.537  
2.173  
1.558  
1.132  
1.118  
1.087  
1.073  
.000

Current Data Parameters  
 NAME CB6072-H  
 EXPNO 2  
 PROCNO 1  
 F2 - Acquisition Parameters  
 Date\_ 20210705  
 Time 22.17 h  
 INSTRUM spect  
 PROBHD z119470\_0283 ( )  
 PULPROG zg30  
 TD 65536  
 SFO1 500.1330883 MHz  
 SOLVENT CDCl3  
 NS 16  
 DS 2  
 SWH 10000.000 Hz  
 FIDRES 0.305176 Hz  
 AQ 3.2767999 sec  
 RG 93.28  
 DW 50.000 usec  
 DE 6.50 usec  
 TE 295.1 K  
 D1 1.00000000 sec  
 TD0 1  
 SFO1 500.1330883 MHz  
 NUC1 1H  
 P1 10.91 usec  
 PLW1 25.00000000 W  
 F2 - Processing parameters  
 SI 65536  
 SF 500.1300157 MHz  
 WDW EM  
 SSB 0  
 LB 0.30 Hz  
 GB 0  
 PC 1.00

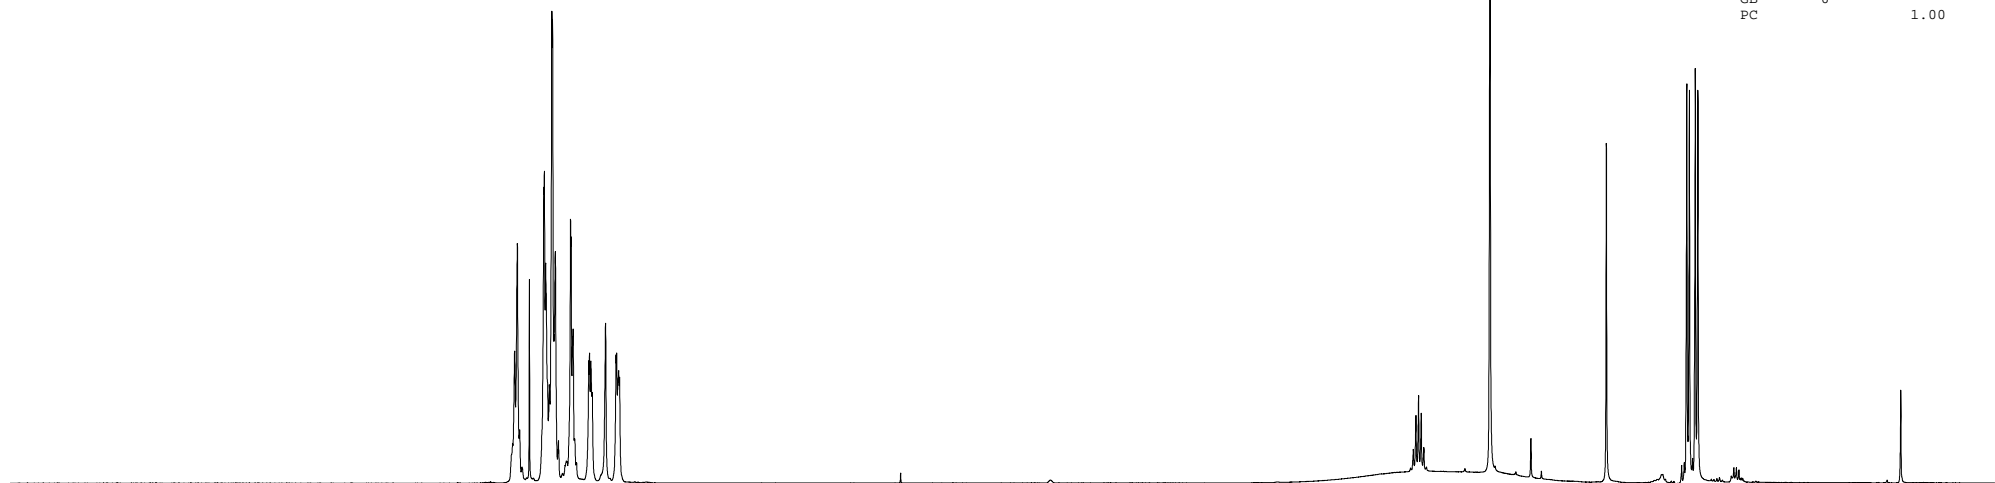

9 8 7 6 5 4 3 2 1 0 ppm

3.026  
9.832  
2.981  
1.970  
1.064  
2.000

1.080  
3.057  
2.909  
3.012

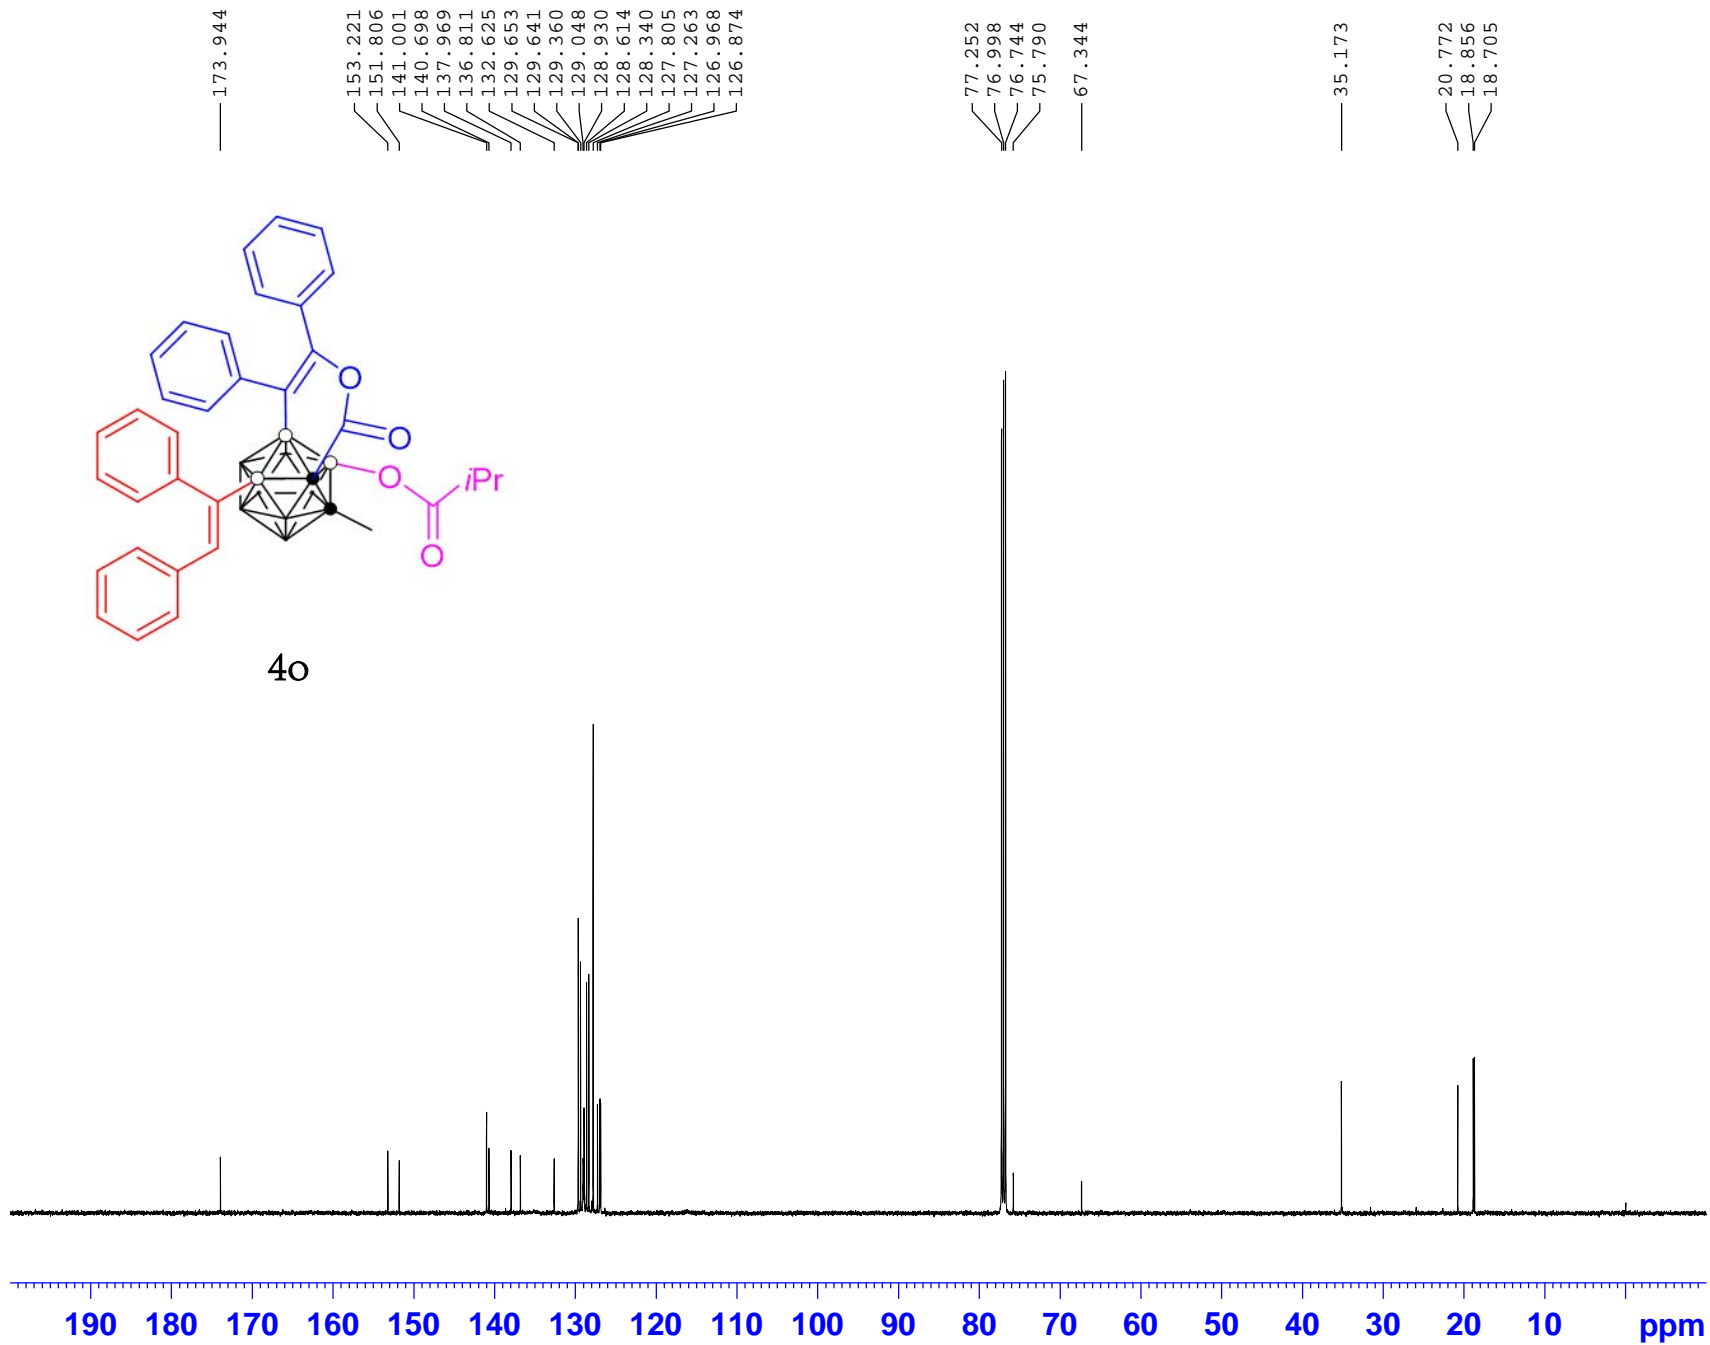

```

Current Data Parameters
NAME      CB6072-C
EXPNO    3
PROCNO   1

F2 - Acquisition Parameters
Date_    20210705
Time     23.57 h
INSTRUM  spect
PROBHD   Z119470_0283 (
PULPROG  zgpg30
TD       65536
SOLVENT  CDCl3
NS       1536
DS       4
SWH      29761.904 Hz
FIDRES   0.908261 Hz
AQ       1.1010048 sec
RG       206.72
DW       16.800 usec
DE       6.50 usec
TE       295.1 K
D1       2.0000000 sec
D11      0.0300000 sec
TD0      1
SF01     125.7703643 MHz
NUC1     13C
P1       9.75 usec
PLW1     94.0000000 W
SFO2     500.1320005 MHz
NUC2     1H
CPDPRG2  waltz16
PCPD2    80.00 usec
PLW2     25.0000000 W
PLW12    0.46495000 W
PLW13    0.23387000 W

F2 - Processing parameters
SI       32768
SF       125.7577945 MHz
WDW      EM
SSB      0
LB       1.00 Hz
GB       0
PC       1.40

```

# $^{11}\text{B}\{^1\text{H}\}$ NMR

CB6072-B-dc

— -3.68  
— -5.60  
— -6.87  
  
— -13.97

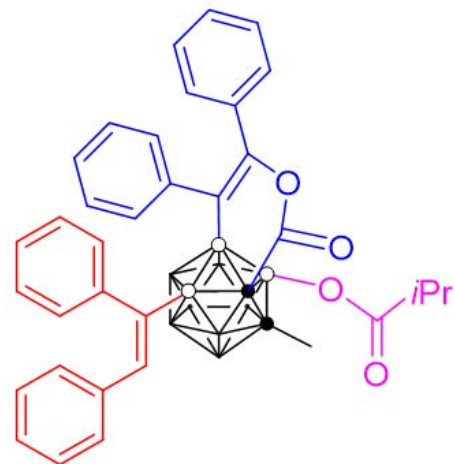

4o

Current Data Parameters  
NAME CB6072-B-dc  
EXPNO 2  
PROCNO 1

F2 - Acquisition Parameters  
Date\_ 20210705  
Time 22.21 h  
INSTRUM spect  
PROBHD Z119470\_0283 (  
PULPROG zgpg30  
TD 32768  
SOLVENT CDCl3  
NS 64  
DS 4  
SWH 24038.461 Hz  
FIDRES 1.467191 Hz  
AQ 0.6815744 sec  
RG 206.72  
DW 20.800 usec  
DE 6.50 usec  
TE 295.2 K  
D1 1.00000000 sec  
D11 0.03000000 sec  
TD0 1  
SFO1 160.4615790 MHz  
NUC1 11B  
P1 16.00 usec  
PLW1 50.00000000 W  
SFO2 500.1320005 MHz  
NUC2 1H  
CPDPRG[2] waltz16  
PCPD2 80.00 usec  
PLW2 25.00000000 W  
PLW12 0.46495000 W  
PLW13 0.23387000 W

F2 - Processing parameters  
SI 16384  
SF 160.4615999 MHz  
WDW EM  
SSB 0  
LB 1.00 Hz  
GB 0  
PC 1.40

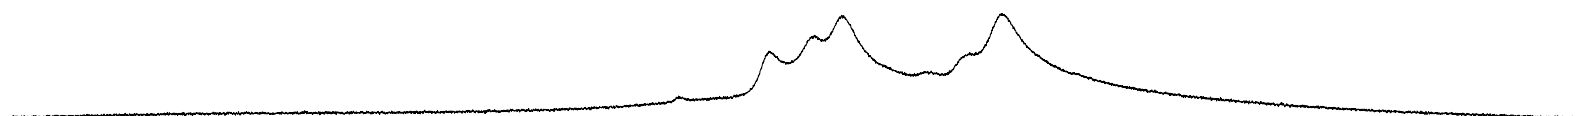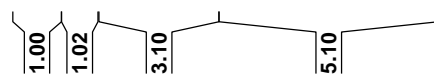

25 20 15 10 5 0 -5 -10 -15 -20 -25 -30 -35 ppm

# $^{11}\text{B}$ NMR

CB6072-B-c

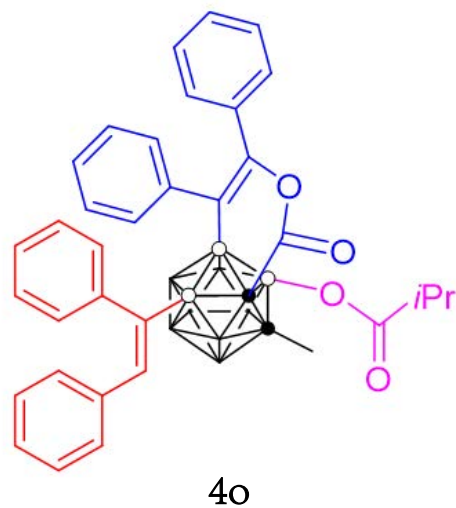

— -3.59  
— -5.05  
— -6.28  
— -13.38

Current Data Parameters  
NAME CB6072-B-c  
EXPNO 3  
PROCNO 1

F2 - Acquisition Parameters  
Date\_ 20210705  
Time 22.32 h  
INSTRUM spect  
PROBHD Z119470\_0283 (  
PULPROG zg  
TD 32768  
SOLVENT CDCl3  
NS 64  
DS 4  
SWH 24038.461 Hz  
FIDRES 1.467191 Hz  
AQ 0.6815744 sec  
RG 206.72  
DW 20.800 usec  
DE 6.50 usec  
TE 295.1 K  
D1 1.00000000 sec  
TD0 1  
SF01 160.4615792 MHz  
NUC1 11B  
P1 16.00 usec  
PLW1 50.00000000 W

F2 - Processing parameters  
SI 16384  
SF 160.4615997 MHz  
WDW EM  
SSB 0  
LB 1.00 Hz  
GB 0  
PC 1.40

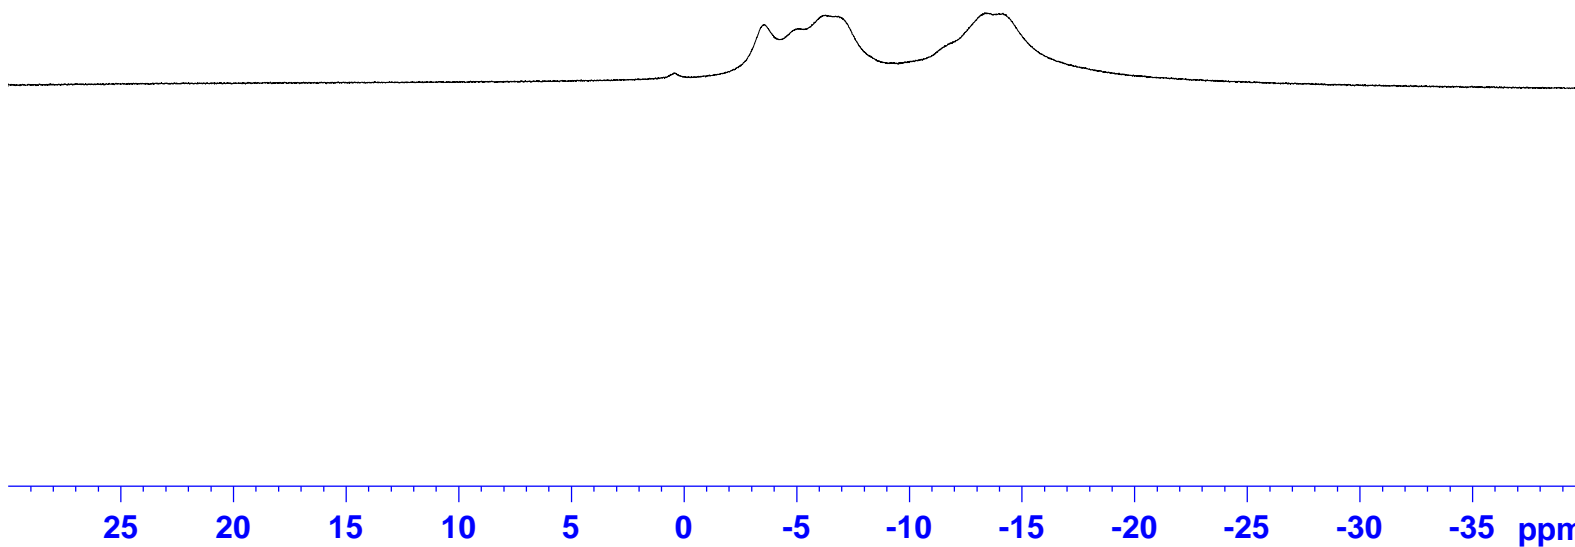

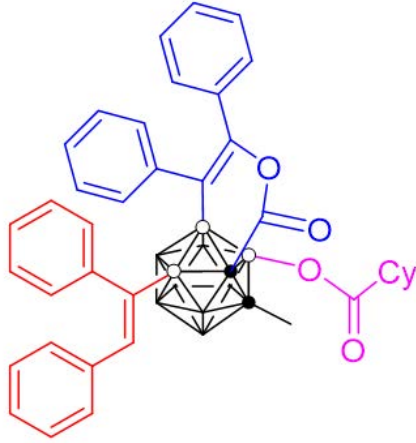

4p

7.326  
7.312  
7.260  
7.173  
7.169  
7.162  
7.133  
7.119  
7.040  
7.037  
7.026  
6.900  
6.896  
6.889  
6.881  
6.866  
6.802  
6.798  
6.788  
6.783

2.288  
2.281  
2.170  
1.884  
1.880  
1.853  
1.824  
1.820  
1.674  
1.659  
1.644  
1.566  
1.360  
1.355  
1.303  
1.297  
1.279  
1.273  
1.162  
1.138  
1.083

Current Data Parameters

|                             |                 |
|-----------------------------|-----------------|
| NAME                        | CB6074-H        |
| EXPNO                       | 3               |
| PROCNO                      | 1               |
| F2 - Acquisition Parameters |                 |
| Date_                       | 20210706        |
| Time                        | 0.23 h          |
| INSTRUM                     | spect           |
| PROBHD                      | Z119470_0283 (  |
| PULPROG                     | zg30            |
| TD                          | 65536           |
| SOLVENT                     | CDC13           |
| NS                          | 32              |
| DS                          | 2               |
| SWH                         | 10000.000 Hz    |
| FIDRES                      | 0.305176 Hz     |
| AQ                          | 3.2767999 sec   |
| RG                          | 163.99          |
| DW                          | 50.000 usec     |
| DE                          | 6.50 usec       |
| TE                          | 295.1 K         |
| D1                          | 1.00000000 sec  |
| TD0                         | 1               |
| SFO1                        | 500.1330883 MHz |
| NUC1                        | 1H              |
| P1                          | 10.91 usec      |
| PLW1                        | 25.00000000 W   |
| F2 - Processing parameters  |                 |
| SI                          | 65536           |
| SF                          | 500.1300124 MHz |
| WDW                         | EM              |
| SSB                         | 0               |
| LB                          | 0.30 Hz         |
| GB                          | 0               |
| PC                          | 1.00            |

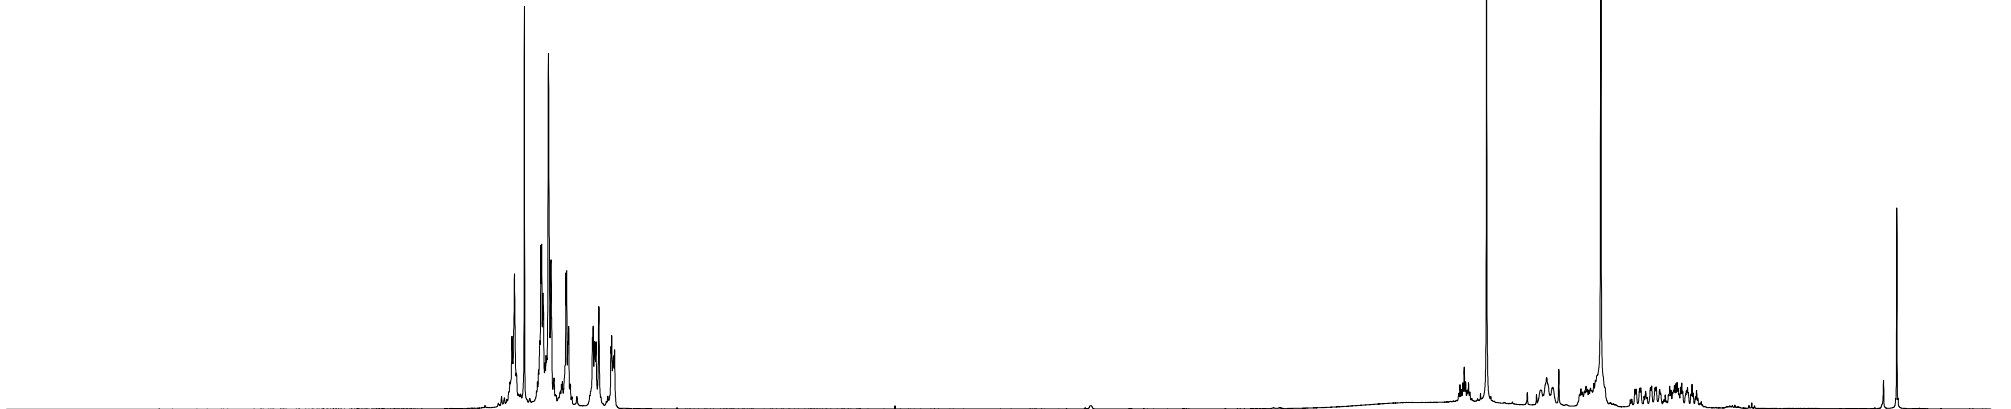

9

8

7

6

5

4

3

2

1

0 ppm

3.000  
9.750  
3.200  
3.068  
1.938

1.202  
2.964  
2.064  
2.098  
6.168



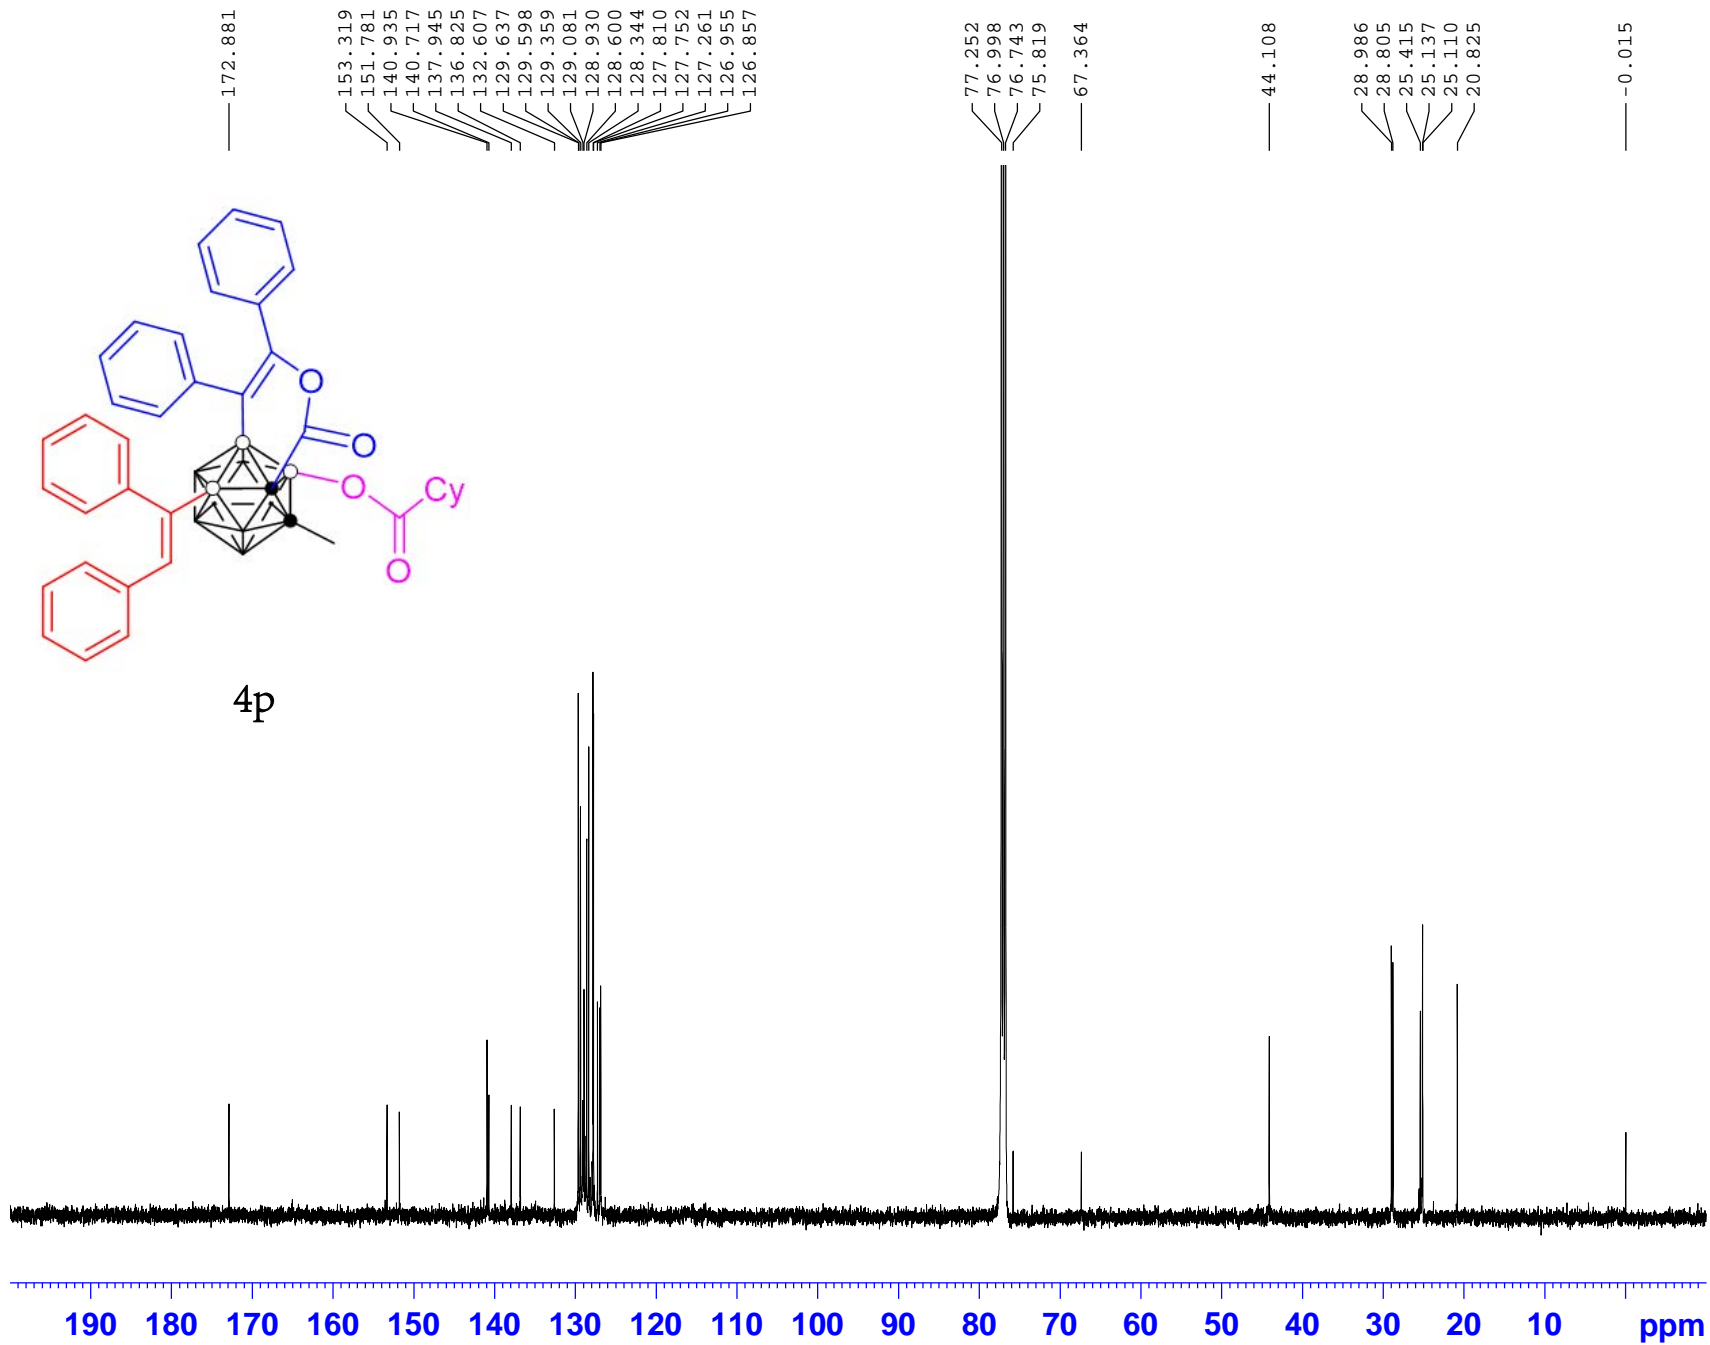

```

Current Data Parameters
NAME      CB6074-C
EXPNO    4
PROCNO   1

F2 - Acquisition Parameters
Date_    20210706
Time     7.22 h
INSTRUM  spect
PROBHD   Z119470_0283 (
PULPROG  zgpg30
TD       65536
SOLVENT  CDCl3
NS       7168
DS       4
SWH      29761.904 Hz
FIDRES   0.908261 Hz
AQ       1.1010048 sec
RG       206.72
DW       16.800 usec
DE       6.50 usec
TE       295.2 K
D1       2.0000000 sec
D11      0.0300000 sec
TD0      1
SF01     125.7703643 MHz
NUC1     13C
P1       9.75 usec
PLW1     94.0000000 W
SFO2     500.1320005 MHz
NUC2     1H
CPDPRG2  waltz16
PCPD2    80.00 usec
PLW2     25.0000000 W
PLW12    0.46495000 W
PLW13    0.23387000 W

F2 - Processing parameters
SI       32768
SF       125.7577931 MHz
WDW      EM
SSB      0
LB       1.00 Hz
GB       0
PC       1.40

```

# $^{11}\text{B}\{^1\text{H}\}$ NMR

CB6074-B-dc

— -3.71  
— -5.61  
— -7.02  
  
— -12.40  
— -14.11

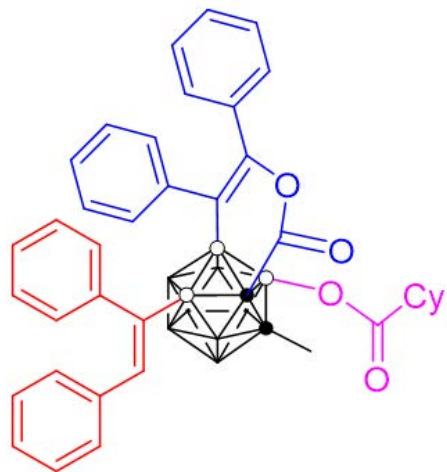

4p

Current Data Parameters  
NAME CB6074-B-dc  
EXPNO 3  
PROCNO 1

F2 - Acquisition Parameters  
Date\_ 20210706  
Time 0.45 h  
INSTRUM spect  
PROBHD Z119470\_0283 (  
PULPROG zgpg30  
TD 32768  
SOLVENT CDCl3  
NS 256  
DS 4  
SWH 24038.461 Hz  
FIDRES 1.467191 Hz  
AQ 0.6815744 sec  
RG 206.72  
DW 20.800 usec  
DE 6.50 usec  
TE 295.2 K  
D1 1.00000000 sec  
D11 0.03000000 sec  
TD0 1  
SFO1 160.4615790 MHz  
NUC1 11B  
P1 16.00 usec  
PLW1 50.00000000 W  
SFO2 500.1320005 MHz  
NUC2 1H  
CPDPRG[2] waltz16  
PCPD2 80.00 usec  
PLW2 25.00000000 W  
PLW12 0.46495000 W  
PLW13 0.23387000 W

F2 - Processing parameters  
SI 16384  
SF 160.4615999 MHz  
WDW EM  
SSB 0  
LB 1.00 Hz  
GB 0  
PC 1.40

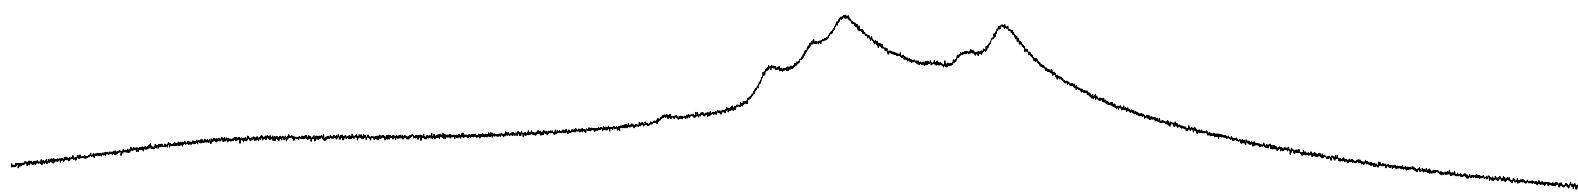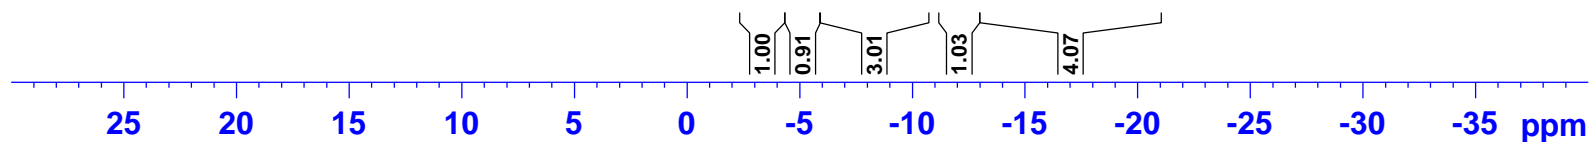

# $^{11}\text{B}$ NMR

CB6074-B-c

— -3.60  
— -6.92  
— -14.28

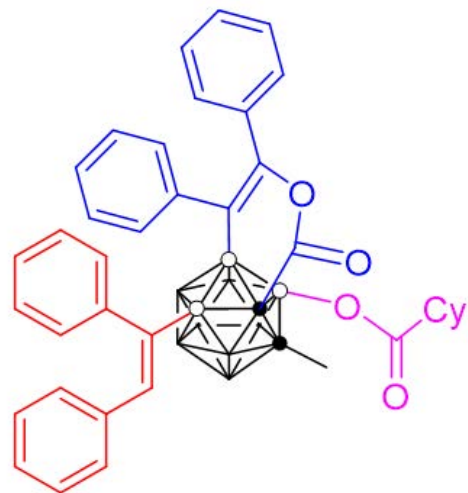

4p

Current Data Parameters  
NAME CB6074-B-c  
EXPNO 4  
PROCNO 1

F2 - Acquisition Parameters  
Date\_ 20210706  
Time 0.59 h  
INSTRUM spect  
PROBHD Z119470\_0283 (  
PULPROG zg  
TD 32768  
SOLVENT CDCl3  
NS 256  
DS 4  
SWH 24038.461 Hz  
FIDRES 1.467191 Hz  
AQ 0.6815744 sec  
RG 206.72  
DW 20.800 usec  
DE 6.50 usec  
TE 295.2 K  
D1 1.00000000 sec  
TD0 1  
SF01 160.4615792 MHz  
NUC1 11B  
P1 16.00 usec  
PLW1 50.00000000 W

F2 - Processing parameters  
SI 16384  
SF 160.4615997 MHz  
WDW EM  
SSB 0  
LB 1.00 Hz  
GB 0  
PC 1.40

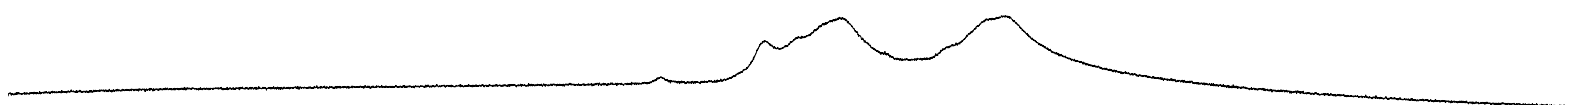

25 20 15 10 5 0 -5 -10 -15 -20 -25 -30 -35 ppm
